# Supplementary material for: Asymmetric organocatalytic cascade Michael/hemiketalization/retro-Henry reaction of β,γ-unsaturated ketoesters with α-nitroketones
Source: Royal Society of Chemistry journal article supplement (doi:10.1039/c1cc11124h), 2011-01-01
Supplement: c1cc11124h.pdf [file c1cc11124h.pdf]

# Asymmetric Organocatalytic Cascade Michael/Hemiketalization/retro-Henry Reaction of $\beta,\gamma$ -Unsaturated Ketoesters with $\alpha$ -Nitroketones

Yaojun Gao, Qiao Ren, Woon-Yew, Siau, and Jian Wang\*

Department of Chemistry, National University of Singapore

3 Science Drive 3, Singapore 117543

Email: [chmwangj@nus.edu.sg](mailto:chmwangj@nus.edu.sg)

## Supporting Information

### Contents:

|                                                                              |     |
|------------------------------------------------------------------------------|-----|
| 1. General information                                                       | S2  |
| 2. General procedure for preparation of the catalyst <b>IV</b>               | S3  |
| 3. Representative procedure for Michael addition reaction                    | S6  |
| 4. Analytical data of Michael addition reaction products                     | S6  |
| 5. Preparation of the Compound <b>3u</b> for X-ray Crystallographic Analysis | S16 |
| 6. HPLC chromatogram profile and NMR spectra of the products                 | S16 |

## 1. General information

Chemicals and solvents were purchased from commercial suppliers and used as received.  $^1\text{H}$  and  $^{13}\text{C}$  NMR spectra were recorded on a Bruker ACF300 (300 MHz) or AMX500 (500 MHz) spectrometer. Chemical shifts were reported in parts per million (ppm), and the residual solvent peak was used as an internal reference: proton (chloroform  $\delta$  7.26), carbon (chloroform  $\delta$  77.0) or tetramethylsilane (TMS  $\delta$  0.00) was used as a reference. Multiplicity was indicated as follows: s (singlet), d (doublet), t (triplet), q (quartet), m (multiplet), dd (doublet of doublet), bs (broad singlet). Coupling constants were reported in Hertz (Hz). Low resolution mass spectra were obtained on a Finnigan/MAT LCQ spectrometer in ESI mode, and a Finnigan/MAT 95XL-T mass spectrometer in EI mode. All high resolution mass spectra were obtained on a Finnigan/MAT 95XL-T mass spectrometer. For thin layer chromatography (TLC), Merck pre-coated TLC plates (Merck 60 F254) were used, and compounds were visualized with a UV light at 254 nm. Further visualization was achieved by staining with  $\text{KMnO}_4$  solution, or ninhydrin followed by heating using a heat gun. Flash chromatography separations were performed on Merck 60 (0.040-0.063 mm) mesh silica gel. The enantiomeric excesses of products were determined by chiral phase HPLC analysis. Optical rotations were recorded on Jasco DIP-1000 polarimeter.

## 2. General procedure for preparation of the catalyst IX.

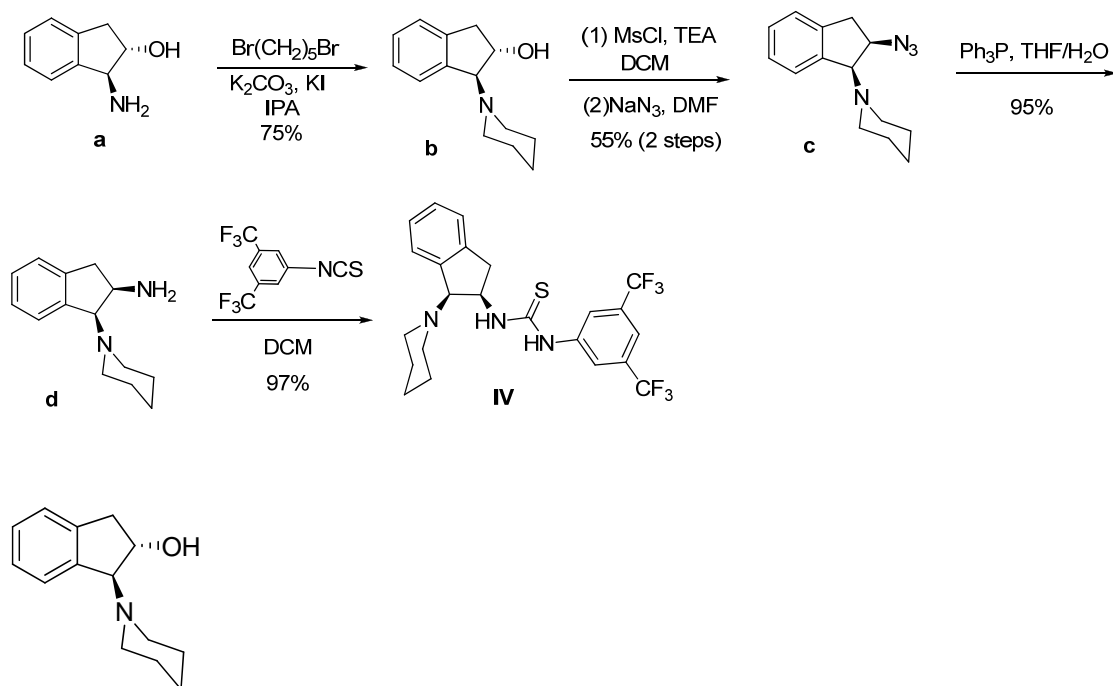

**(1S,2S)-1-(Piperidin-1-yl)-2,3-dihydro-1H-inden-2-ol (a)**. Compound **a** (0.75 g, 5 mmol), 1,5-dibromopentane (1.38 g, 6.0 mmol), potassium carbonate (1.80 g, 13 mmol), potassium iodide (0.17 g, 1.0 mmol) and 10 mL iso-propanol were added into a sealed tube. The mixture was heated at 80 °C for 48hrs and then allowed to cool to room temperature. The mixture was filtered and washing with DCM, the filtrate was concentrated and the resulting residue was purified by silica gel chromatography (eluting with 1 : 5 EtOAc- hexane then 1:10 methanol-DCM) to obtain the product **b** (0.82 g, 75% yield).  $^1\text{H}$  NMR (300 MHz,  $\text{CDCl}_3$ ):  $\delta$  = 7.36-7.33 (m, 1H), 7.12-7.16 (m, 3H), 4.66 (dd,  $J$  = 12.3, 5.3 Hz, 1H), 4.08 (d,  $J$  = 4.8 Hz, 1H), 3.25 (dd,  $J$  = 16.2, 7.1 Hz, 1H), 2.80 (dd,  $J$  = 16.2, 5.5 Hz, 1H), 2.62-2.61 (m, 4H), 1.58-1.54 (m, 4H), 1.46 (d,  $J$  = 5.3 Hz, 2H);  $^{13}\text{C}$  NMR (75 MHz,  $\text{CDCl}_3$ ):  $\delta$  = 140.62, 140.33, 127.66, 126.41, 125.82, 124.90, 78.49, 73.54, 50.79, 40.06, 26.51, 24.66; HRMS (ESI) calcd for  $\text{C}_{14}\text{H}_{20}\text{NO}$  ( $\text{M} + \text{H}^+$ ) 218.1545, found 218.1545.

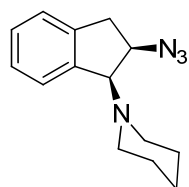

**1-((1S,2R)-2-Azido-2,3-dihydro-1H-inden-1-yl)piperidine (c)**. To a stirred solution of compound **b** (0.78

g, 3.6 mmol) and triethylamine (1.1 g, 10.8 mmol) in dry DCM (10 mL) at 0°C under nitrogen was added dropwise methanesulfonyl chloride (0.62 g, 5.4 mmol). The mixture was stirred for another 20 min at room temperature, and the solvent was evaporated under reduced pressure. The residue was extracted with DCM, washed successively with water, and brine, and dried over MgSO<sub>4</sub>. The organic layer was concentrated to afford crude mesylate intermediate. Then the crude mesylate intermediate was redissolved in DMF (10 mL), followed by adding NaN<sub>3</sub> (1.87 g, 28.8 mmol). The mixture was heated under nitrogen at 70°C for 6 hrs. After the mixture was cooled, the solvent was evaporated under reduced pressure and the residue was extracted with EtOAc (25 mL x 3) and dried over MgSO<sub>4</sub>. The organic layer was removed under reduced pressure, and the crude product was purified by silica gel chromatography (eluting with 1:10 EtOAc-hexane) to afford product **c** (0.48 g, 55% yield, two step). <sup>1</sup>H NMR (500 MHz, CDCl<sub>3</sub>): δ = 7.26-7.10 (m, 4H), 4.63 (d, *J* = 6.9 Hz, 1H), 3.17 (td, *J* = 8.0 Hz, 6.8, 1H), 3.03 (dd, *J* = 15.8, 7.9 Hz, 1H), 2.81 (dd, *J* = 15.8, 7.9 Hz, 1H), 2.48 (ddt, *J* = 38.5, 10.7, 5.2 Hz, 4H), 1.53 (dt, *J* = 11.3, 5.7 Hz, 4H), 1.39 (dd, *J* = 11.7, 6.0 Hz, 2H); <sup>13</sup>C NMR (125 MHz, CDCl<sub>3</sub>): δ = 140.43, 139.14, 128.56, 126.94, 124.71, 124.15, 72.82, 66.85, 51.91, 33.83, 25.94, 24.30; HRMS (ESI) calcd for C<sub>14</sub>H<sub>19</sub>N<sub>4</sub> (M + H<sup>+</sup>) 243.1610, found 243.1612.

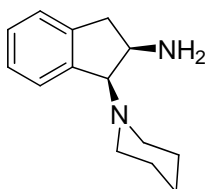

**(1S,2R)-1-(Piperidin-1-yl)-2,3-dihydro-1H-inden-2-amine (d).** To a solution of compound **c** (0.46 g, 1.9 mmol) in 10 mL THF was added triphenylphosphane (1.5 g, 5.7 mmol). The mixture was stirred at room temperature for 3h, then added 3 mL water, heated at 60°C for 4 hrs. The solvent was removed by reduced pressure, and the resulting residue was purified by a very short silica gel column (eluting with 1:10 to 1: 5 methanol-DCM) to afford compound **d** (0.39g, 95% yield). <sup>1</sup>H NMR (500 MHz, CDCl<sub>3</sub>): δ = 7.27 (t, *J* = 5.8 Hz, 1H), 7.19-7.11 (m, 3H), 4.31 (d, *J* = 6.9 Hz, 1H), 2.99-2.83 (m, 3H), 2.60-2.58(m, 4H), 2.45 (s, 2H), 1.64-1.59 (m, 4H), 1.45 (dt, *J* = 11.7, 5.8 Hz, 2H); <sup>13</sup>C NMR (125 MHz, CDCl<sub>3</sub>): δ = 144.92, 139.73, 127.18, 126.54, 124.36, 123.34, 77.45, 58.16, 51.84, 31.67, 25.82, 24.29; HRMS (ESI) calcd for C<sub>14</sub>H<sub>21</sub>N<sub>2</sub> (M + H<sup>+</sup>) 217.1705, found 217.1708.

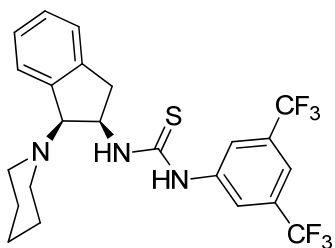

**1-(3,5-Bis(trifluoromethyl)phenyl)-3-((1S,2R)-1-(piperidin-1-yl)-2,3-dihydro-1H-inden-2-yl)thiourea**

**(IV)**. To a solution of compound **d** (0.39 g, 1.81 mmol) in 10 mL DCM was added 1-isothiocyanato-3,5-bis(trifluoromethyl)benzene (0.52 g, 1.90 mmol) dropwise. The mixture was stirred at room temperature for 30min, reaction completed. The solvent was removed by rotary evaporation and pure product **IV** (0.90 g, 97% yield) was obtained by silica gel chromatography (eluting with 1:10 EtOAc- hexane then 1: 10 methanol-DCM).  $^1\text{H}$  NMR (300 MHz,  $\text{CDCl}_3$ ):  $\delta$  = 12.14 (s, 1H), 7.98 (s, 2H), 7.61 (s, 1H), 7.27 (ddd,  $J$  = 20.9, 12.6, 4.3 Hz, 4H), 6.68 (s, 1H), 5.22 (m, 1H), 3.63 (dd,  $J$  = 6.2, 8.3 Hz, 1H), 3.13 (dd,  $J$  = 16.1, 8.6 Hz, 1H), 2.92 (dd,  $J$  = 16.2, 8.9 Hz, 1H), 2.68-2.60 (m, 4H), 1.56-1.44 (m, 6H);  $^{13}\text{C}$  NMR (75 MHz,  $\text{CDCl}_3$ ):  $\delta$  = 183.34, 141.50, 140.33, 137.67, 132.31, 131.87, 131.42, 130.98, 129.36, 127.78, 125.76, 125.53, 124.93, 123.58, 121.31, 118.75, 75.21, 62.01, 50.56, 26.29, 25.90, 23.78; HRMS (ESI) calcd for  $\text{C}_{23}\text{H}_{24}\text{F}_6\text{N}_3\text{S}$  ( $\text{M} + \text{H}^+$ ) 488.1595, found 488.1587.

**3. Representative procedure for Michael addition reaction**

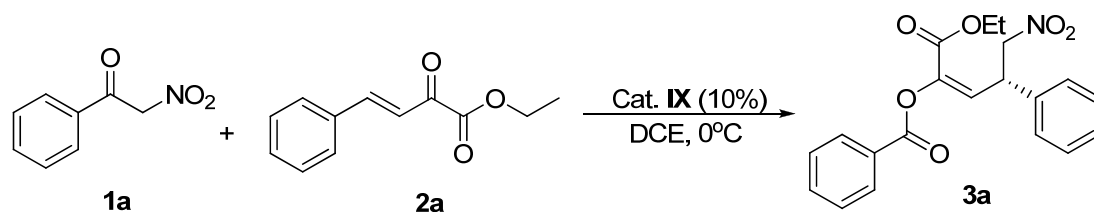

**General procedure:** To a solution of 2-Nitro-1-phenylethanone **1a** (16.5 mg, 0.1 mmol) in 0.45 mL DCE was added (*E*)-Ethyl 2-oxo-4-phenylbut-3-enoate **2a** (22.5 mg, 0.11 mmol) at 0°C, followed by adding of 50  $\mu$ L of pre-cooled catalyst **IV** solution (4.9 mg in 50  $\mu$ L DCE, 0.01 mmol). The mixture was stirred at 0°C for 24 h. The crude product was purified by column chromatography on silica gel, eluted by hexane/EtOAc= 5:1 to afford 35.1 mg (95% yield) of the desired product **3a** as colorless oil.

#### 4. Analytical data of Michael addition reaction products

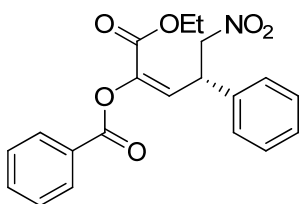

(*S,E*)-1-ethoxy-5-nitro-1-oxo-4-phenylpent-2-en-2-yl benzoate (**3a**) (Table 3, entry 1)  $^1\text{H}$  NMR (500 MHz,  $\text{CDCl}_3$ )  $\delta$  8.11 (dd,  $J = 8.4, 1.1$  Hz, 2H), 7.67-7.64 (m, 1H), 7.51 (t,  $J = 7.9$  Hz, 2H), 7.35-7.22 (m, 5H), 6.75 (d,  $J = 9.5$  Hz, 1H), 4.73 (d,  $J = 7.6$  Hz, 2H), 4.60 (dd,  $J = 17.2, 7.7$  Hz, 1H), 4.24 (q,  $J = 7.1$  Hz, 2H), 1.26 (t,  $J = 7.1$  Hz, 4H).  $^{13}\text{C}$  NMR (125 MHz,  $\text{CDCl}_3$ )  $\delta$  164.17, 161.19, 140.42, 136.56, 134.04, 130.37, 129.34, 128.67, 128.27, 128.16, 127.43, 127.17, 78.42, 61.99, 41.12, 14.02; HRMS (ESI) calcd for  $\text{C}_{20}\text{H}_{19}\text{NNaO}_6$  ( $\text{M} + \text{Na}^+$ ) 392.1110, found 392.1109; HPLC (Chiralpak IC, *i*-propanol/hexane = 20/80, flow rate 1.0 mL/min,  $\lambda = 254$  nm):  $t_{\text{major}} = 13.47$  min,  $t_{\text{minor}} = 17.81$  min,  $ee = 92\%$ ;  $[\alpha]_{\text{D}}^{25} = +111.5$  ( $c = 1.23$  in  $\text{CHCl}_3$ ).

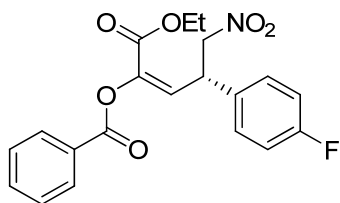

**(*S,E*)-1-ethoxy-4-(4-fluorophenyl)-5-nitro-1-oxopent-2-en-2-yl benzoate (3b)** (Table 3 , entry 2)  $^1\text{H}$  NMR (500 MHz,  $\text{CDCl}_3$ )  $\delta$  8.10 (dt,  $J = 8.5, 1.6$  Hz, 2H), 7.68-7.65 (m, 1H), 7.53-7.50 (m, 2H), 7.22-7.19 (m, 2H), 7.04-7.00 (m, 2H), 6.72 (d,  $J = 9.5$  Hz, 1H), 4.74-4.67 (m, 2H), 4.58 (dt,  $J = 15.4, 7.6$  Hz, 1H), 4.24 (qd,  $J = 7.1, 0.8$  Hz, 2H), 1.26 (t,  $J = 7.3$  Hz, 3H).  $^{13}\text{C}$  NMR (75 MHz,  $\text{CDCl}_3$ )  $\delta$  164.15, 164.07, 161.11, 160.78, 140.53, 134.14, 132.35, 132.31, 130.34, 129.19, 129.08, 128.71, 128.03, 126.80, 116.46, 116.16, 78.38, 62.07, 40.39, 14.00; HRMS (ESI) calcd for  $\text{C}_{20}\text{H}_{18}\text{FNNaO}_6$  ( $\text{M} + \text{Na}^+$ ) 410.1016, found 410.1012; HPLC (Chiralpak IC, *i*-propanol/hexane = 20/80, flow rate 1.0 mL/min,  $\lambda = 254$  nm):  $t_{\text{major}} = 11.59$  min,  $t_{\text{minor}} = 14.90$  min,  $ee = 90\%$ ;  $[\alpha]_{\text{D}}^{25} = +88.5$  ( $c = 1.13$  in  $\text{CHCl}_3$ ).

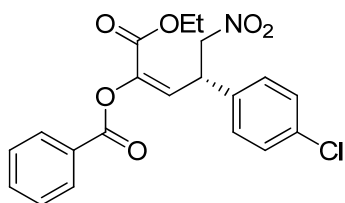

**(*S,E*)-4-(4-chlorophenyl)-1-ethoxy-5-nitro-1-oxopent-2-en-2-yl benzoate (3c)** (Table 3 , entry 3)  $^1\text{H}$  NMR (500 MHz,  $\text{CDCl}_3$ )  $\delta$  8.10-8.09 (m, 2H), 7.68-7.65 (m, 1H), 7.53-7.50 (m, 2H), 7.32-7.29 (m, 2H), 7.18-7.16 (m, 2H), 6.70 (d,  $J = 9.5$  Hz, 1H), 4.74-4.68 (m, 2H), 4.57 (dd,  $J = 17.0, 7.6$  Hz, 1H), 4.27-4.22 (m, 2H), 1.26 (t,  $J = 7.1$  Hz, 3H).  $^{13}\text{C}$  NMR (75 MHz,  $\text{CDCl}_3$ )  $\delta$  164.13, 161.06, 140.70, 135.05, 134.29, 134.17, 130.36, 129.53, 128.80, 128.73, 127.99, 126.49, 78.16, 62.10, 40.50, 14.01; HRMS (ESI) calcd for  $\text{C}_{20}\text{H}_{18}\text{ClNaO}_6$  ( $\text{M} + \text{Na}^+$ ) 426.0720, found 426.0718; HPLC (Chiralpak IC, *i*-propanol/hexane = 20/80, flow rate 1.0 mL/min,  $\lambda = 254$  nm):  $t_{\text{major}} = 12.02$  min,  $t_{\text{minor}} = 15.05$  min,  $ee = 90\%$ ;  $[\alpha]_{\text{D}}^{25} = +122.3$  ( $c = 1.13$  in  $\text{CHCl}_3$ ).

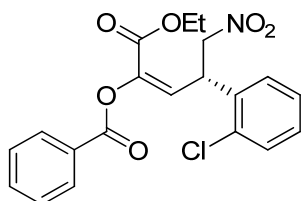

**(*S,E*)-4-(2-chlorophenyl)-1-ethoxy-5-nitro-1-oxopent-2-en-2-yl benzoate (3d)** (Table 3 , entry 4)  $^1\text{H}$  NMR (500 MHz,  $\text{CDCl}_3$ )  $\delta$  8.07-8.05 (m, 2H), 7.65-7.62 (m, 1H), 7.50-7.47 (m, 2H), 7.34 (dd,  $J = 7.7, 1.7$  Hz, 1H), 7.28-7.19 (m, 3H), 6.82 (d,  $J = 8.8$  Hz, 1H), 5.11 (td,  $J = 8.5, 6.9$  Hz, 1H), 4.80-4.72 (m, 2H), 4.25 (q,  $J = 6.9$  Hz, 2H), 1.27 (t,  $J = 7.1$  Hz, 3H).  $^{13}\text{C}$  NMR (125 MHz,  $\text{CDCl}_3$ )  $\delta$  163.98, 161.13, 140.98, 134.20, 133.96, 133.56, 130.44, 130.28, 129.44, 128.96, 128.56, 128.06, 127.63, 125.92, 77.03, 62.02, 38.08, 14.01; HRMS (ESI) calcd for  $\text{C}_{20}\text{H}_{18}\text{ClNNaO}_6$  ( $\text{M} + \text{Na}^+$ ) 426.0720, found 426.0714; HPLC (Chiralpak IC, *i*-propanol/hexane = 20/80, flow rate 1.0 mL/min,  $\lambda = 254$  nm):  $t_{\text{major}} = 12.67$  min,  $t_{\text{minor}} = 15.99$  min,  $ee = 97\%$ ;  $[\alpha]_{\text{D}}^{25} = +30.9$  ( $c = 1.2$  in  $\text{CHCl}_3$ ).

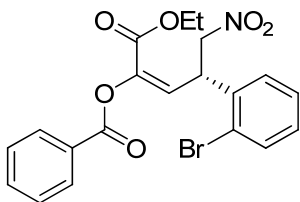

**(*S,E*)-4-(2-bromophenyl)-1-ethoxy-5-nitro-1-oxopent-2-en-2-yl benzoate (3e)** (Table 3 , entry 5)  $^1\text{H}$  NMR (500 MHz, MeOD)  $\delta$  8.06 (dd,  $J = 8.4, 1.1$  Hz, 2H), 7.63 (t,  $J = 7.4$  Hz, 1H), 7.53-7.46 (m, 3H), 7.29-7.26 (m, 2H), 7.14-7.10 (m, 1H), 6.82 (d,  $J = 8.8$  Hz, 1H), 5.15 (td,  $J = 8.7, 6.6$  Hz, 1H), 4.78-4.69 (m, 2H), 4.25 (q,  $J = 6.9$  Hz, 2H), 1.27 (t,  $J = 7.1$  Hz, 3H).  $^{13}\text{C}$  NMR (125 MHz,  $\text{CDCl}_3$ )  $\delta$  163.97, 161.14, 141.03, 135.96, 133.94, 133.74, 130.32, 129.67, 128.90, 128.54, 128.26, 128.09, 126.01, 124.04, 77.22, 62.02, 40.33, 14.02; HRMS (ESI) calcd for  $\text{C}_{20}\text{H}_{18}\text{BrNNaO}_6$  ( $\text{M} + \text{Na}^+$ ) 470.0215, found 470.0216; HPLC (Chiralpak IC, *i*-propanol/hexane = 20/80, flow rate 1.0 mL/min,  $\lambda = 254$  nm):  $t_{\text{major}} = 14.73$  min,  $t_{\text{minor}} = 15.90$  min,  $ee = 96\%$ ;  $[\alpha]_{\text{D}}^{25} = +0.8$  ( $c = 1.4$  in  $\text{CHCl}_3$ ).

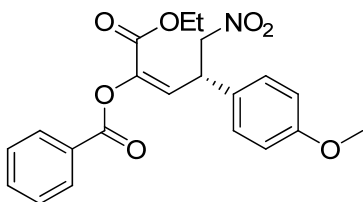

**(*S,E*)-1-ethoxy-4-(4-methoxyphenyl)-5-nitro-1-oxopent-2-en-2-yl benzoate (3f)** (Table 3 , entry 6)  $^1\text{H}$



NMR (500 MHz, CDCl<sub>3</sub>) δ 8.12-8.10 (m, 2H), 7.67-7.64 (m, 1H), 7.53-7.50 (m, 2H), 7.15-7.13 (m, 2H), 6.86-6.84 (m, 2H), 6.72 (d, *J* = 9.8 Hz, 1H), 4.70-4.68 (m, 2H), 4.54 (dt, *J* = 15.8, 7.9 Hz, 1H), 4.24 (q, *J* = 7.3 Hz, 2H), 3.77 (s, 3H), 1.26 (t, *J* = 7.1 Hz, 3H). <sup>13</sup>C NMR (125 MHz, CDCl<sub>3</sub>) δ 164.19, 161.25, 159.44, 140.11, 134.02, 130.37, 128.67, 128.51, 128.39, 128.20, 127.44, 114.73, 78.61, 61.96, 55.28, 40.45, 14.02; HRMS (ESI) calcd for C<sub>21</sub>H<sub>21</sub>NNaO<sub>7</sub> (M + Na<sup>+</sup>) 422.1216, found 422.1213; HPLC (Chiralpak IC, *i*-propanol/hexane = 20/80, flow rate 1.0 mL/min, λ = 254 nm): *t*<sub>major</sub> = 18.39 min, *t*<sub>minor</sub> = 24.11 min, *ee* = 93%; [α]<sub>D</sub><sup>25</sup> = +113.3 (*c* = 1.07 in CHCl<sub>3</sub>).

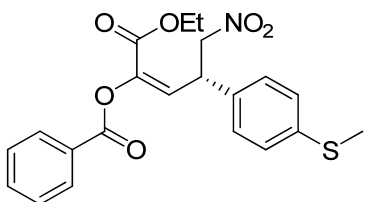

**(*S,E*)-1-ethoxy-4-(4-(methylthio)phenyl)-5-nitro-1-oxopent-2-en-2-yl benzoate (3g)** (Table 3, entry 7)

<sup>1</sup>H NMR (500 MHz, CDCl<sub>3</sub>) δ 8.11-8.09 (m, 2H), 7.66 (t, *J* = 7.6 Hz, 1H), 7.51 (t, *J* = 7.9 Hz, 2H), 7.21-7.19 (m, 2H), 7.15-7.13 (m, 2H), 6.71 (d, *J* = 9.5 Hz, 1H), 4.70 (d, *J* = 7.9 Hz, 2H), 4.55 (dd, *J* = 17.0, 7.9 Hz, 1H), 4.24 (q, *J* = 7.1 Hz, 2H), 2.44 (s, 3H), 1.26 (t, *J* = 7.1 Hz, 3H). <sup>13</sup>C NMR (125 MHz, CDCl<sub>3</sub>) δ 164.15, 161.16, 140.38, 139.02, 134.07, 133.08, 130.35, 128.68, 128.11, 127.84, 127.18, 126.97, 78.30, 62.01, 40.64, 15.59, 14.01; HRMS (ESI) calcd for C<sub>21</sub>H<sub>21</sub>NNaO<sub>6</sub>S (M + Na<sup>+</sup>) 438.0987, found 438.0960; HPLC (Chiralpak IC, *i*-propanol/hexane = 20/80, flow rate 1.0 mL/min, λ = 254 nm): *t*<sub>major</sub> = 18.50 min, *t*<sub>minor</sub> = 23.57 min, *ee* = 91%; [α]<sub>D</sub><sup>25</sup> = +157.6 (*c* = 1.13 in CHCl<sub>3</sub>).

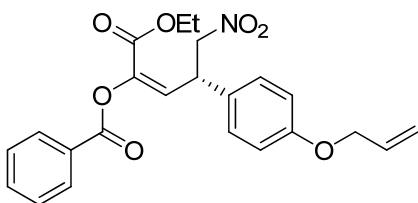

**(*S,E*)-4-(4-(allyloxy)phenyl)-1-ethoxy-5-nitro-1-oxopent-2-en-2-yl benzoate (3h)** (Table 3, entry 8)

<sup>1</sup>H NMR (500 MHz, CDCl<sub>3</sub>) δ 8.12-8.10 (m, 2H), 7.67-7.64 (m, 1H), 7.53-7.50 (m, 2H), 7.14-7.13 (m, 2H), 6.88-6.85 (m, 2H), 6.72 (d, *J* = 9.8 Hz, 1H), 6.05-5.98 (m, 1H), 5.39 (ddd, *J* = 17.3, 3.2, 1.6 Hz, 1H), 5.28 (ddd, *J* = 10.4, 2.7, 1.3 Hz, 1H), 4.69 (d, *J* = 7.9 Hz, 2H), 4.53-4.49 (m, 3H), 4.26-4.22 (m, 2H), 1.26 (t, *J* =

7.1 Hz, 3H);  $^{13}\text{C}$  NMR (125 MHz,  $\text{CDCl}_3$ )  $\delta$  164.19, 161.25, 158.45, 140.11, 134.03, 132.97, 130.37, 128.67, 128.53, 128.50, 128.17, 127.42, 117.82, 115.52, 78.59, 68.82, 61.97, 40.43, 14.02; HRMS (ESI) calcd for  $\text{C}_{23}\text{H}_{23}\text{NNaO}_7$  ( $\text{M} + \text{Na}^+$ ) 448.1372, found 448.1345; HPLC (Chiralpak IC, *i*-propanol/hexane = 20/80, flow rate 1.0 mL/min,  $\lambda = 254$  nm):  $t_{\text{major}} = 15.71$  min,  $t_{\text{minor}} = 20.80$  min,  $ee = 93\%$ ;  $[\alpha]_{\text{D}}^{25} = +99.8$  ( $c = 1.0$  in  $\text{CHCl}_3$ ).

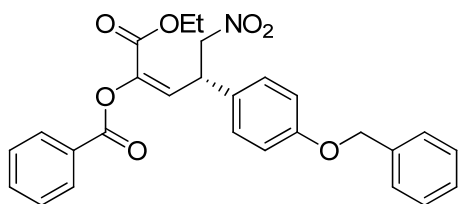

**(*S,E*)-4-(4-(benzyloxy)phenyl)-1-ethoxy-5-nitro-1-oxopent-2-en-2-yl benzoate (3i)** (Table 3 , entry 9)  $^1\text{H}$  NMR (500 MHz,  $\text{CDCl}_3$ )  $\delta$  8.11 (dd,  $J = 8.4, 1.1$  Hz, 2H), 7.66 (t,  $J = 6.8$  Hz, 1H), 7.51 (t,  $J = 7.7$  Hz, 2H), 7.42-7.31 (m, 5H), 7.15-7.13 (m, 2H), 6.93-6.92 (m, 2H), 6.72 (d,  $J = 9.5$  Hz, 1H), 5.02 (s, 2H), 4.69 (d,  $J = 7.9$  Hz, 2H), 4.54 (dd,  $J = 17.2, 7.7$  Hz, 1H), 4.24 (q,  $J = 6.8$  Hz, 2H), 1.26 (t,  $J = 7.1$  Hz, 4H).  $^{13}\text{C}$  NMR (125 MHz,  $\text{CDCl}_3$ )  $\delta$  164.21, 161.25, 158.67, 140.15, 136.69, 134.03, 130.38, 128.68, 128.63, 128.56, 128.20, 128.06, 127.43, 127.40, 127.20, 115.66, 78.59, 70.08, 61.98, 40.46, 14.04; HRMS (ESI) calcd for  $\text{C}_{27}\text{H}_{25}\text{NNaO}_7$  ( $\text{M} + \text{Na}^+$ ) 498.1529, found 498.1508; HPLC (Chiralpak IC, *i*-propanol/hexane = 20/80, flow rate 1.0 mL/min,  $\lambda = 254$  nm):  $t_{\text{major}} = 19.08$  min,  $t_{\text{minor}} = 29.83$  min,  $ee = 93\%$ ;  $[\alpha]_{\text{D}}^{25} = +97.4$  ( $c = 1.17$  in  $\text{CHCl}_3$ ).

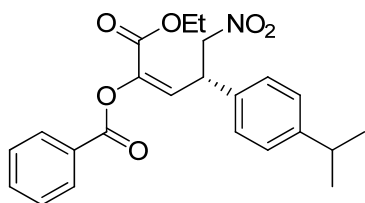

**(*S,E*)-1-ethoxy-4-(4-isopropylphenyl)-5-nitro-1-oxopent-2-en-2-yl benzoate (3j)** (Table 3 , entry 10)  $^1\text{H}$  NMR (500 MHz,  $\text{CDCl}_3$ )  $\delta$  8.11 (dd,  $J = 8.4, 1.1$  Hz, 2H), 7.67-7.64 (m, 1H), 7.51 (dd,  $J = 10.7, 4.7$  Hz, 2H), 7.19-7.14 (m, 4H), 6.74 (d,  $J = 9.5$  Hz, 1H), 4.72 (d,  $J = 7.9$  Hz, 2H), 4.57 (dt,  $J = 15.8, 7.7$  Hz, 1H), 4.26-4.21 (m, 2H), 2.86 (dt,  $J = 13.9, 6.9$  Hz, 1H), 1.26 (t,  $J = 7.1$  Hz, 3H), 1.21 (d,  $J = 6.9$  Hz, 6H).  $^{13}\text{C}$

NMR (125 MHz, CDCl<sub>3</sub>)  $\delta$  164.17, 161.24, 148.99, 140.19, 134.00, 133.73, 130.36, 128.65, 128.18, 127.44, 127.37, 127.35, 78.48, 61.95, 40.79, 33.72, 23.82, 14.02; HRMS (ESI) calcd for C<sub>23</sub>H<sub>25</sub>NNaO<sub>6</sub> (M + Na<sup>+</sup>) 434.1580, found 434.1570; HPLC (Chiralpak IC, *i*-propanol/hexane = 20/80, flow rate 1.0 mL/min,  $\lambda$  = 254 nm):  $t_{\text{major}}$  = 10.87 min,  $t_{\text{minor}}$  = 14.86 min,  $ee$  = 92%;  $[\alpha]_{\text{D}}^{25}$  = +108.6 ( $c$  = 0.93 in CHCl<sub>3</sub>).

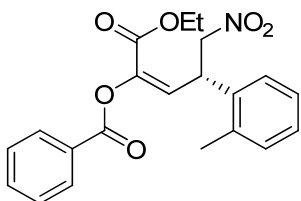

**(*S,E*)-1-ethoxy-5-nitro-1-oxo-4-o-tolylpent-2-en-2-yl benzoate (3k)** (Table 3 , entry 11) <sup>1</sup>H NMR (500 MHz, CDCl<sub>3</sub>)  $\delta$  8.10-8.08 (m, 2H), 7.67-7.64 (m, 1H), 7.52-7.49 (m, 2H), 7.22-7.13 (m, 4H), 6.68 (d,  $J$  = 9.5 Hz, 1H), 4.89 (dt,  $J$  = 9.5, 7.7 Hz, 1H), 4.72 (dd,  $J$  = 7.6, 2.5 Hz, 2H), 4.24 (tt,  $J$  = 7.3, 3.6 Hz, 2H), 2.31 (s, 3H), 1.26 (t,  $J$  = 7.1 Hz, 3H). <sup>13</sup>C NMR (125 MHz, CDCl<sub>3</sub>)  $\delta$  164.17, 161.18, 140.26, 136.21, 134.96, 134.04, 131.32, 130.29, 128.66, 128.11, 128.00, 127.35, 126.97, 126.13, 77.90, 61.99, 36.90, 19.34, 14.02; HRMS (ESI) calcd for C<sub>21</sub>H<sub>21</sub>NNaO<sub>6</sub> (M + Na<sup>+</sup>) 406.1267, found 406.1251; HPLC (Chiralpak IC, *i*-propanol/hexane = 20/80, flow rate 1.0 mL/min,  $\lambda$  = 254 nm):  $t_{\text{major}}$  = 12.90 min,  $t_{\text{minor}}$  = 12.61 min,  $ee$  = 92%;  $[\alpha]_{\text{D}}^{25}$  = +67.5 ( $c$  = 0.93 in CHCl<sub>3</sub>).

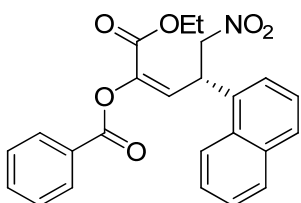

**(*S,E*)-1-ethoxy-4-(naphthalen-1-yl)-5-nitro-1-oxopent-2-en-2-yl benzoate (3l)** (Table 3 , entry 12) <sup>1</sup>H NMR (500 MHz, CDCl<sub>3</sub>)  $\delta$  8.06-8.01 (m, 3H), 7.86-7.84 (m, 1H), 7.79 (dd,  $J$  = 6.3, 3.2 Hz, 1H), 7.63 (t,  $J$  = 7.6 Hz, 1H), 7.50-7.42 (m, 6H), 6.87 (d,  $J$  = 8.8 Hz, 1H), 5.49 (dd,  $J$  = 15.8, 8.5 Hz, 1H), 4.92-4.85 (m, 2H), 4.23 (q,  $J$  = 7.1 Hz, 2H), 1.25 (t,  $J$  = 7.1 Hz, 3H). <sup>13</sup>C NMR (125 MHz, CDCl<sub>3</sub>)  $\delta$  164.08, 161.18, 140.64, 134.18, 133.96, 132.76, 130.79, 130.32, 129.25, 128.95, 128.59, 128.08, 127.42, 127.01, 126.17, 125.45, 124.59, 122.24, 78.03, 62.01, 36.45, 14.02; HRMS (ESI) calcd for C<sub>24</sub>H<sub>21</sub>NNaO<sub>6</sub> (M + Na<sup>+</sup>) 442.1267, found 442.1260; HPLC (Chiralpak IC, *i*-propanol/hexane = 20/80, flow rate 1.0 mL/min,  $\lambda$  = 254

nm):  $t_{\text{major}} = 17.03$  min,  $t_{\text{minor}} = 27.08$  min,  $ee = 94\%$ ;  $[\alpha]_{\text{D}}^{25} = +2.6$  ( $c = 1.1$  in  $\text{CHCl}_3$ ).

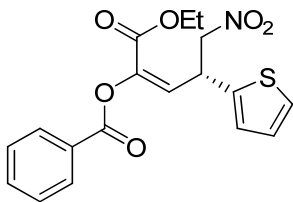

**(*R,E*)-1-ethoxy-5-nitro-1-oxo-4-(thiophen-2-yl)pent-2-en-2-yl benzoate (3m)** (Table 3 , entry 13)  $^1\text{H}$  NMR (500 MHz,  $\text{CDCl}_3$ )  $\delta$  8.14 (dd,  $J = 8.4, 1.1$  Hz, 2H), 7.68-7.65 (m, 1H), 7.52 (t,  $J = 7.9$  Hz, 2H), 7.25 (dd,  $J = 5.4, 1.6$  Hz, 1H), 6.96 (dt,  $J = 7.6, 3.5$  Hz, 2H), 6.72 (d,  $J = 9.8$  Hz, 1H), 4.92-4.89 (m, 1H), 4.74 (qd,  $J = 12.6, 7.4$  Hz, 2H), 4.26 (q,  $J = 7.1$  Hz, 2H), 1.28 (t,  $J = 7.1$  Hz, 3H).  $^{13}\text{C}$  NMR (125 MHz,  $\text{CDCl}_3$ )  $\delta$  164.16, 161.09, 140.64, 138.65, 134.13, 130.43, 128.71, 128.06, 127.38, 126.36, 125.71, 125.45, 78.68, 62.11, 36.33, 14.02; HRMS (ESI) calcd for  $\text{C}_{18}\text{H}_{17}\text{NNaO}_6\text{S}$  ( $\text{M} + \text{Na}^+$ ) 398.0674, found 398.0669; HPLC (Chiralpak IC, *i*-propanol/hexane = 20/80, flow rate 1.0 mL/min,  $\lambda = 254$  nm):  $t_{\text{major}} = 14.01$  min,  $t_{\text{minor}} = 17.58$  min,  $ee = 91\%$ ;  $[\alpha]_{\text{D}}^{25} = +57.6$  ( $c = 0.97$  in  $\text{CHCl}_3$ ).

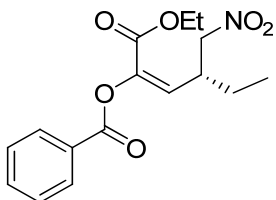

**(*R,E*)-1-ethoxy-4-(nitromethyl)-1-oxohex-2-en-2-yl benzoate (3n)** (Table 3 , entry 14)  $^1\text{H}$  NMR (500 MHz,  $\text{CDCl}_3$ )  $\delta$  8.13 (dd,  $J = 8.4, 1.1$  Hz, 2H), 7.66-7.63 (m, 1H), 7.51 (t,  $J = 7.9$  Hz, 2H), 6.43 (d,  $J = 10.1$  Hz, 1H), 4.42 (qd,  $J = 12.3, 7.1$  Hz, 2H), 4.26 (q,  $J = 7.1$  Hz, 2H), 3.31-3.23 (m, 1H), 1.66-1.58 (m, 2H), 1.55-1.46 (m, 1H), 1.28 (t,  $J = 7.1$  Hz, 3H), 0.97 (t,  $J = 7.4$  Hz, 3H).  $^{13}\text{C}$  NMR (125 MHz,  $\text{CDCl}_3$ )  $\delta$  164.36, 161.19, 141.25, 133.97, 130.33, 128.67, 128.29, 128.27, 78.18, 61.89, 37.11, 24.75, 14.03, 11.22; HRMS (ESI) calcd for  $\text{C}_{16}\text{H}_{19}\text{NNaO}_6$  ( $\text{M} + \text{Na}^+$ ) 344.1110, found 344.1108; HPLC (Chiralpak IC, *i*-propanol/hexane = 20/80, flow rate 1.0 mL/min,  $\lambda = 254$  nm):  $t_{\text{major}} = 16.27$  min,  $t_{\text{minor}} = 16.10$  min,  $ee = 92\%$ ;  $[\alpha]_{\text{D}}^{25} = +9.9$  ( $c = 1.1$  in  $\text{CHCl}_3$ ).

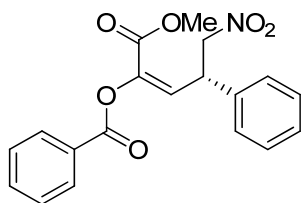

**(*S,E*)-1-methoxy-5-nitro-1-oxo-4-phenylpent-2-en-2-yl benzoate (3o)** (Table 3 , entry 15)  $^1\text{H}$  NMR (500 MHz,  $\text{CDCl}_3$ )  $\delta$  8.11 (dd,  $J = 8.4, 1.4$  Hz, 2H), 7.68-7.64 (m, 1H), 7.52 (t,  $J = 7.7$  Hz, 2H), 7.35-7.22 (m, 5H), 6.78 (d,  $J = 9.5$  Hz, 1H), 4.73 (d,  $J = 7.9$  Hz, 2H), 4.62-4.57 (m, 1H), 3.78 (s, 3H).  $^{13}\text{C}$  NMR (125 MHz,  $\text{CDCl}_3$ )  $\delta$  164.12, 161.69, 140.08, 136.44, 134.11, 130.40, 129.35, 128.69, 128.30, 128.04, 127.63, 127.40, 78.42, 52.72, 41.11; HRMS (ESI) calcd for  $\text{C}_{19}\text{H}_{17}\text{NNaO}_6$  ( $\text{M} + \text{Na}^+$ ) 378.0954, found 378.0950; HPLC (Chiralpak IC, *i*-propanol/hexane = 20/80, flow rate 1.0 mL/min,  $\lambda = 254$  nm):  $t_{\text{major}} = 18.81$  min,  $t_{\text{minor}} = 23.65$  min,  $ee = 92\%$ ;  $[\alpha]_{\text{D}}^{25} = +94.8$  ( $c = 1.0$  in  $\text{CHCl}_3$ ).

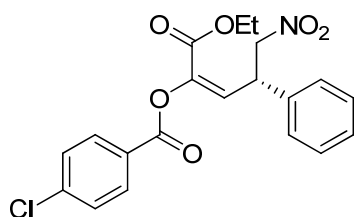

**(*S,E*)-1-ethoxy-5-nitro-1-oxo-4-phenylpent-2-en-2-yl 4-chlorobenzoate (3p)** (Table 3 , entry 16)  $^1\text{H}$  NMR (500 MHz,  $\text{CDCl}_3$ )  $\delta$  8.05-8.02 (m, 2H), 7.48 (dd,  $J = 8.8, 1.9$  Hz, 2H), 7.35-7.26 (m, 3H), 7.23-7.21 (m, 2H), 6.76 (d,  $J = 9.5$  Hz, 1H), 4.72 (d,  $J = 7.6$  Hz, 2H), 4.57 (dd,  $J = 17.2, 7.7$  Hz, 1H), 4.26-4.22 (m, 2H), 1.26 (t,  $J = 7.1$  Hz, 3H).  $^{13}\text{C}$  NMR (125 MHz,  $\text{CDCl}_3$ )  $\delta$  163.32, 161.02, 140.71, 140.30, 136.45, 131.71, 129.38, 129.09, 128.33, 127.41, 127.37, 126.59, 78.47, 62.08, 41.16, 14.02; HRMS (ESI) calcd for  $\text{C}_{20}\text{H}_{18}\text{ClNNaO}_6$  ( $\text{M} + \text{Na}^+$ ) 426.0720, found 426.0718; HPLC (Chiralpak IC, *i*-propanol/hexane = 20/80, flow rate 1.0 mL/min,  $\lambda = 254$  nm):  $t_{\text{major}} = 12.85$  min,  $t_{\text{minor}} = 17.95$  min,  $ee = 90\%$ ;  $[\alpha]_{\text{D}}^{25} = +93.2$  ( $c = 1.15$  in  $\text{CHCl}_3$ ).

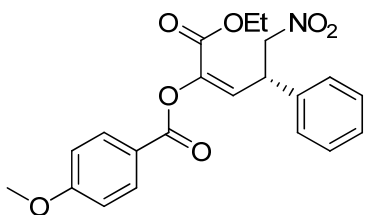

**(*S,E*)-1-ethoxy-5-nitro-1-oxo-4-phenylpent-2-en-2-yl 4-methoxybenzoate (3q)** (Table 3 , entry 17)  $^1\text{H}$  NMR (500 MHz,  $\text{CDCl}_3$ )  $\delta$  8.07 (d,  $J = 8.8$  Hz, 2H), 7.35-7.22 (m, 7H), 6.98 (d,  $J = 9.1$  Hz, 2H), 6.72 (d,  $J = 9.5$  Hz, 1H), 4.73 (d,  $J = 7.6$  Hz, 2H), 4.62-4.56 (m, 1H), 4.25-4.21 (m, 2H), 3.90 (s, 3H), 1.26 (t,  $J = 7.1$  Hz, 3H);  $^{13}\text{C}$  NMR (125 MHz,  $\text{CDCl}_3$ )  $\delta$  164.28, 163.86, 161.36, 140.44, 136.64, 132.56, 129.30, 128.21, 127.42, 126.95, 120.36, 114.36, 113.98, 78.40, 61.92, 55.53, 41.10, 14.01. HRMS (ESI) calcd for  $\text{C}_{21}\text{H}_{21}\text{NNaO}_7$  ( $\text{M} + \text{Na}^+$ ) 422.1216, found 422.1212; HPLC (Chiralpak IC, *i*-propanol/hexane = 20/80, flow rate 1.0 mL/min,  $\lambda = 254$  nm):  $t_{\text{major}} = 25.21$  min,  $t_{\text{minor}} = 41.90$  min,  $ee = 94\%$ ;  $[\alpha]_{\text{D}}^{25} = +84.1$  ( $c = 1.03$  in  $\text{CHCl}_3$ ).

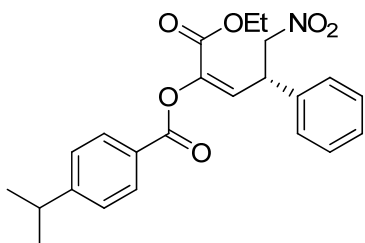

**(*S,E*)-1-ethoxy-5-nitro-1-oxo-4-phenylpent-2-en-2-yl 4-isopropylbenzoate (3r)** (Table 3 , entry 18)  $^1\text{H}$  NMR (500 MHz,  $\text{CDCl}_3$ )  $\delta$  8.05-8.04 (m, 2H), 7.32 (dddd,  $J = 35.0, 29.0, 9.8, 4.9$  Hz, 7H), 6.73 (d,  $J = 9.5$  Hz, 1H), 4.73 (d,  $J = 7.9$  Hz, 2H), 4.62-4.57 (m, 1H), 4.25-4.21 (m, 2H), 3.01 (dt,  $J = 13.6, 6.8$  Hz, 1H), 1.30 (d,  $J = 6.9$  Hz, 6H), 1.25 (t,  $J = 7.1$  Hz, 3H);  $^{13}\text{C}$  NMR (125 MHz,  $\text{CDCl}_3$ )  $\delta$  164.18, 161.27, 155.71, 140.40, 136.59, 130.57, 129.30, 129.06, 129.01, 128.22, 127.41, 127.01, 126.82, 125.67, 78.37, 61.92, 41.08, 34.36, 23.62, 14.01; HRMS (ESI) calcd for  $\text{C}_{23}\text{H}_{25}\text{NNaO}_6$  ( $\text{M} + \text{Na}^+$ ) 434.1580, found 434.1571; HPLC (Chiralpak IC, *i*-propanol/hexane = 20/80, flow rate 1.0 mL/min,  $\lambda = 254$  nm):  $t_{\text{major}} = 12.98$  min,  $t_{\text{minor}} = 21.56$  min,  $ee = 92\%$ ;  $[\alpha]_{\text{D}}^{25} = +113.2$  ( $c = 1.07$  in  $\text{CHCl}_3$ ).

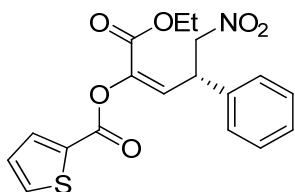

**(*S,E*)-1-ethoxy-5-nitro-1-oxo-4-phenylpent-2-en-2-yl thiophene-2-carboxylate (3s)** (Table 3 , entry 19)

$^1\text{H}$  NMR (500 MHz,  $\text{CDCl}_3$ )  $\delta$  7.94 (dd,  $J = 3.8, 1.3$  Hz, 1H), 7.70 (dd,  $J = 4.9, 1.1$  Hz, 1H), 7.36-7.23 (m, 6H), 7.19 (dd,  $J = 4.9, 3.9$  Hz, 1H), 6.74 (d,  $J = 9.5$  Hz, 1H), 4.74 (d,  $J = 7.6$  Hz, 2H), 4.60 (dd,  $J = 17.2, 7.7$  Hz, 1H), 4.24 (q,  $J = 7.3$  Hz, 2H), 1.27 (t,  $J = 7.1$  Hz, 3H);  $^{13}\text{C}$  NMR (125 MHz,  $\text{CDCl}_3$ )  $\delta$  161.07, 159.39, 139.96, 136.46, 135.47, 134.31, 131.09, 129.34, 129.15, 128.30, 128.21, 127.50, 127.45, 78.30, 62.06, 41.12, 14.02; HRMS (ESI) calcd for  $\text{C}_{18}\text{H}_{17}\text{NNaO}_6\text{S}$  ( $\text{M} + \text{Na}^+$ ) 398.0674, found 398.0668; HPLC (Chiralpak IC, *i*-propanol/hexane = 20/80, flow rate 1.0 mL/min,  $\lambda = 254$  nm):  $t_{\text{major}} = 18.82$  min,  $t_{\text{minor}} = 13.03$  min,  $ee = 90\%$ ;  $[\alpha]_{\text{D}}^{25} = +10.4$  ( $c = 0.33$  in  $\text{CHCl}_3$ ).

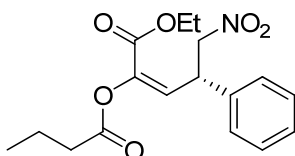

**(*S,E*)-ethyl 2-(butyryloxy)-5-nitro-4-phenylpent-2-enoate (3t)** (Table 3 , entry 20)  $^1\text{H}$  NMR (500 MHz,  $\text{CDCl}_3$ )  $\delta$  7.38-7.22 (m, 5H), 6.62 (d,  $J = 9.5$  Hz, 1H), 4.68 (qd,  $J = 12.6, 7.6$  Hz, 2H), 4.54-5.49 (m, 1H), 4.22 (q,  $J = 7.1$  Hz, 2H), 2.55-2.45 (m, 2H), 1.75 (h,  $J = 7.4$  Hz, 2H), 1.28 (t,  $J = 7.1$  Hz, 3H), 1.03 (t,  $J = 7.4$  Hz, 3H);  $^{13}\text{C}$  NMR (125 MHz,  $\text{CDCl}_3$ )  $\delta$  171.10, 161.23, 140.21, 136.63, 129.34, 128.28, 127.39, 126.75, 78.39, 61.92, 41.04, 35.46, 18.25, 14.02, 13.57. HRMS (ESI) calcd for  $\text{C}_{17}\text{H}_{21}\text{NNaO}_6$  ( $\text{M} + \text{Na}^+$ ) 358.1267, found 358.1259; HPLC (Chiralpak IC, *i*-propanol/hexane = 20/80, flow rate 1.0 mL/min,  $\lambda = 254$  nm):  $t_{\text{major}} = 17.98$  min,  $t_{\text{minor}} = 21.03$  min,  $ee = 75\%$ ;  $[\alpha]_{\text{D}}^{25} = +36.6$  ( $c = 0.9$  in  $\text{CHCl}_3$ ).

## 5. Preparation of the Compound 3u for X-ray Crystallographic Analysis

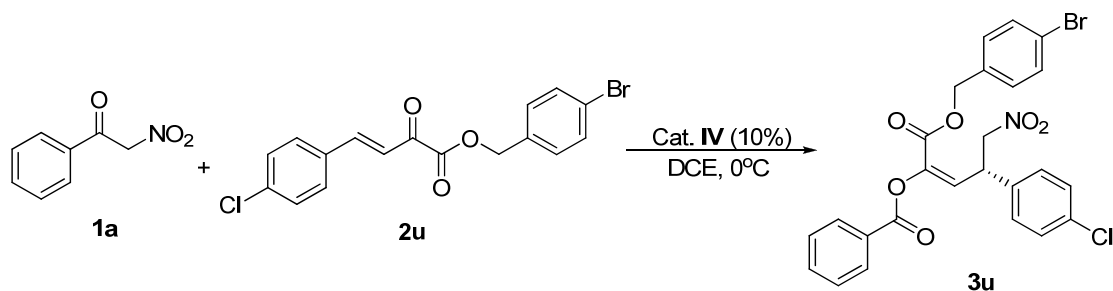

To a solution of Benzoylnitromethane **1a** (33.0 mg, 0.2 mmol) in 0.90 mL DCE was added (*E*)-4-bromobenzyl 4-(4-chlorophenyl)-2-oxobut-3-enoate **2u** (83.5 mg, 0.22 mmol) at 0°C, followed by adding of 100 μL of pre-cooled catalyst **IV** solution (9.8 mg in 100 μL DCE, 0.02 mmol). The mixture was stirred at 0°C for 24 h. The crude product was purified by column chromatography on silica gel, eluted by hexane/EtOAc= 5:1 to afford 88.3 mg (81% yield) of the desired product **3u** as white solid. <sup>1</sup>H NMR (500 MHz, CDCl<sub>3</sub>) δ 8.08 (dd, *J* = 8.3, 1.2 Hz, 2H), 7.66 (d, *J* = 7.5 Hz, 1H), 7.52 (t, *J* = 7.8 Hz, 2H), 7.47 - 7.41 (m, 2H), 7.32 - 7.27 (m, 2H), 7.21 - 7.11 (m, 4H), 6.73 (d, *J* = 9.4 Hz, 1H), 5.21 - 5.10 (m, 2H), 4.72 - 4.68 (m, 2H), 4.61 - 4.54 (m, 1H); <sup>13</sup>C NMR (75 MHz, CDCl<sub>3</sub>) δ 164.13, 160.85, 140.27, 134.80, 134.33, 134.29, 133.86, 131.72, 130.34, 129.88, 129.55, 128.77, 127.77, 127.32, 122.57, 78.05, 66.83, 40.50.

#### 6. HPLC chromatogram profile and NMR spectra of the products



Compound **b**

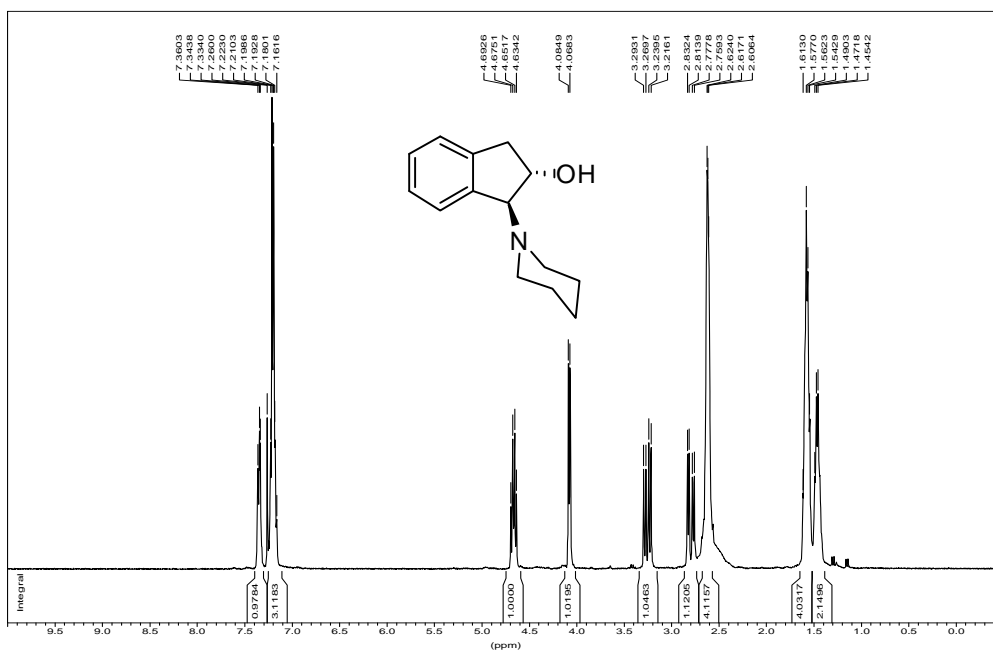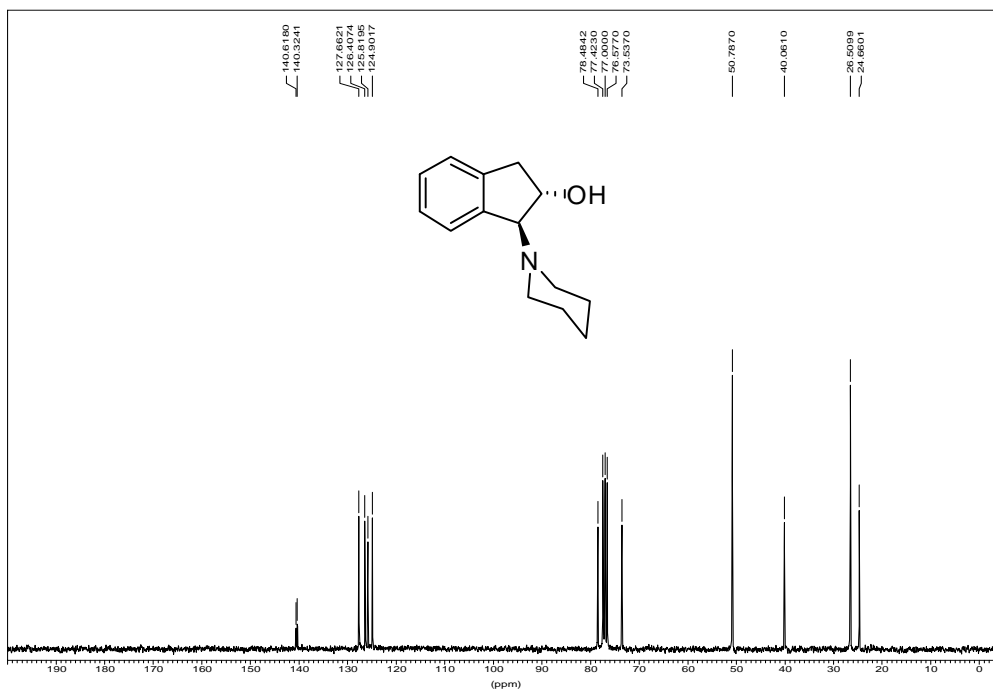

Compound **c**

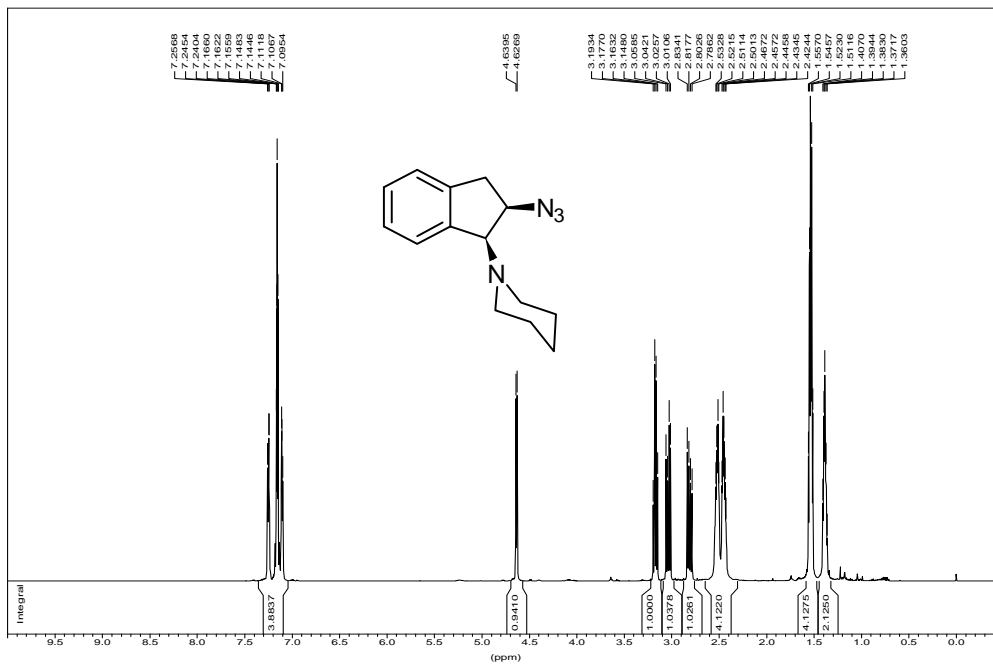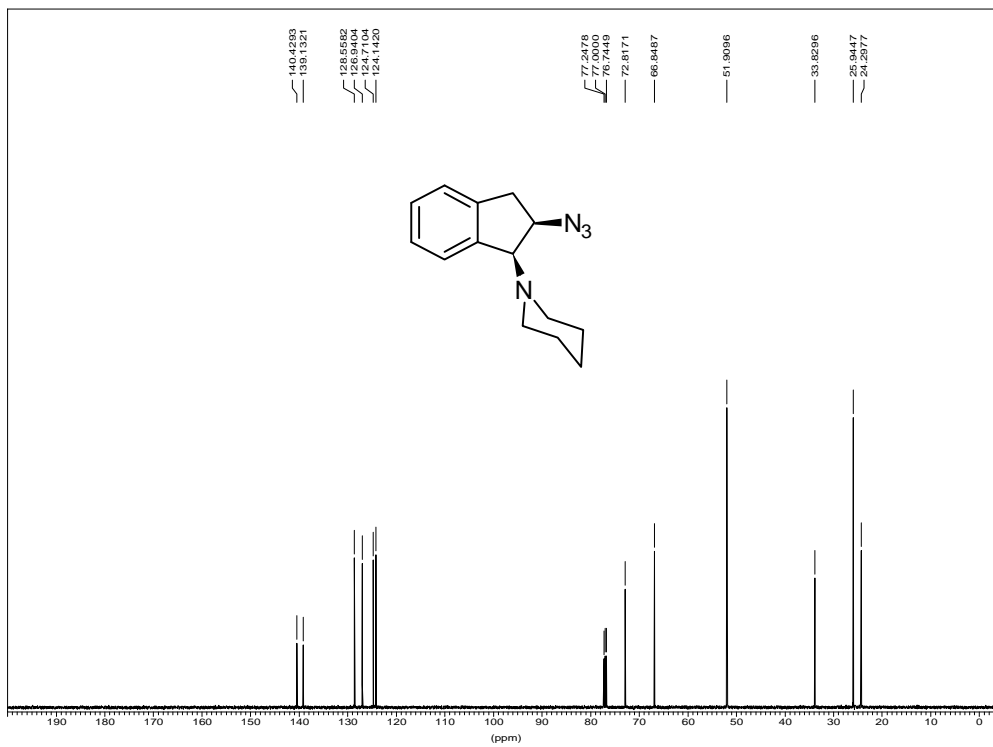

Compound **d**

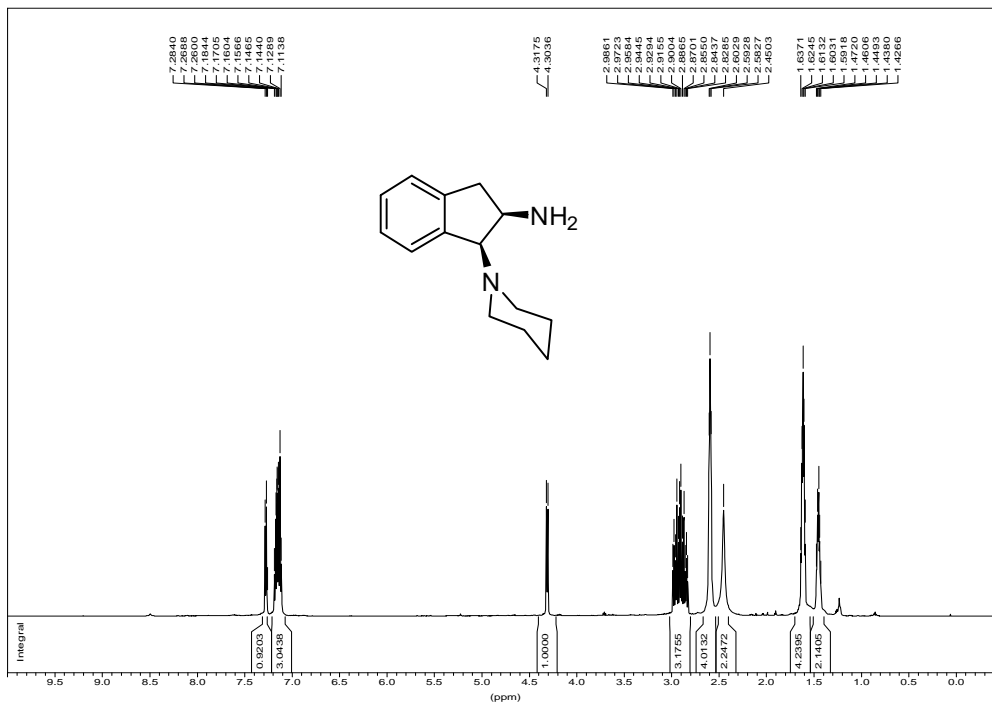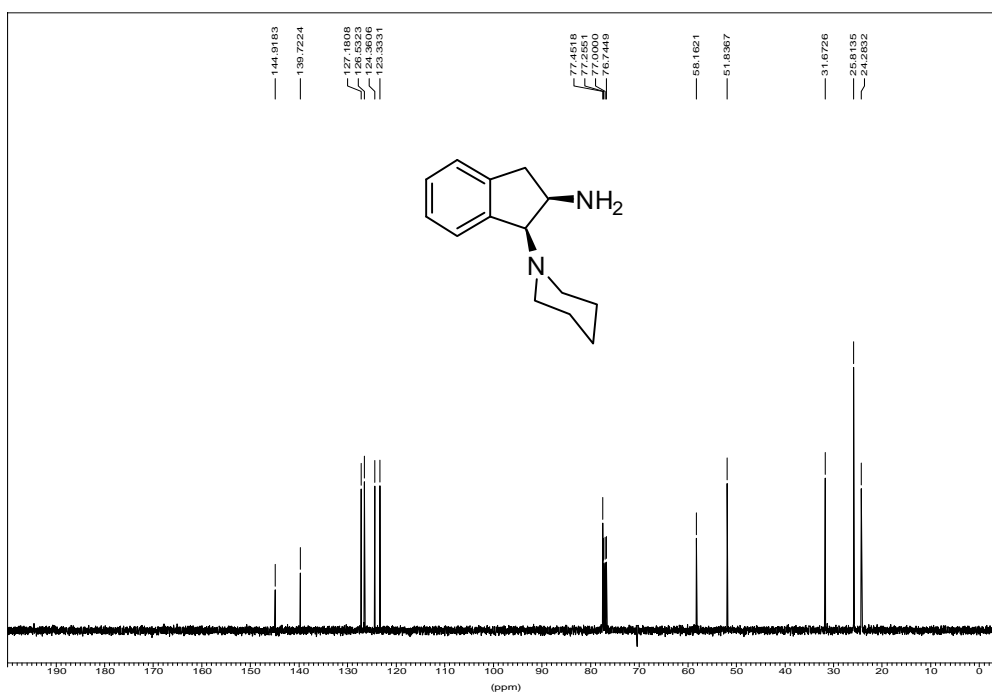

Compound IV

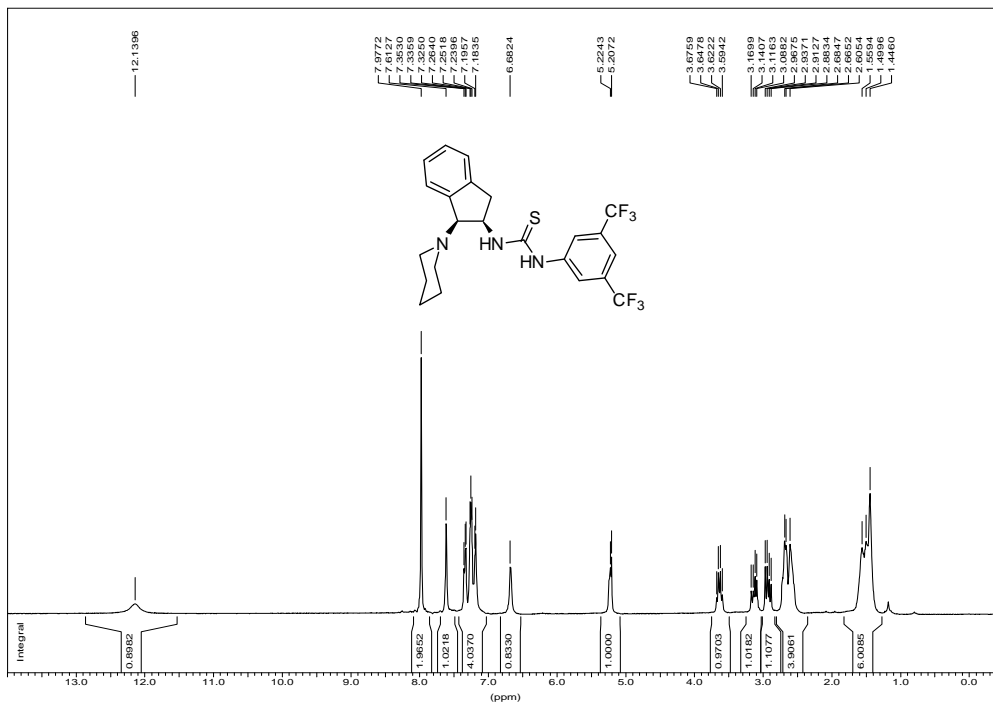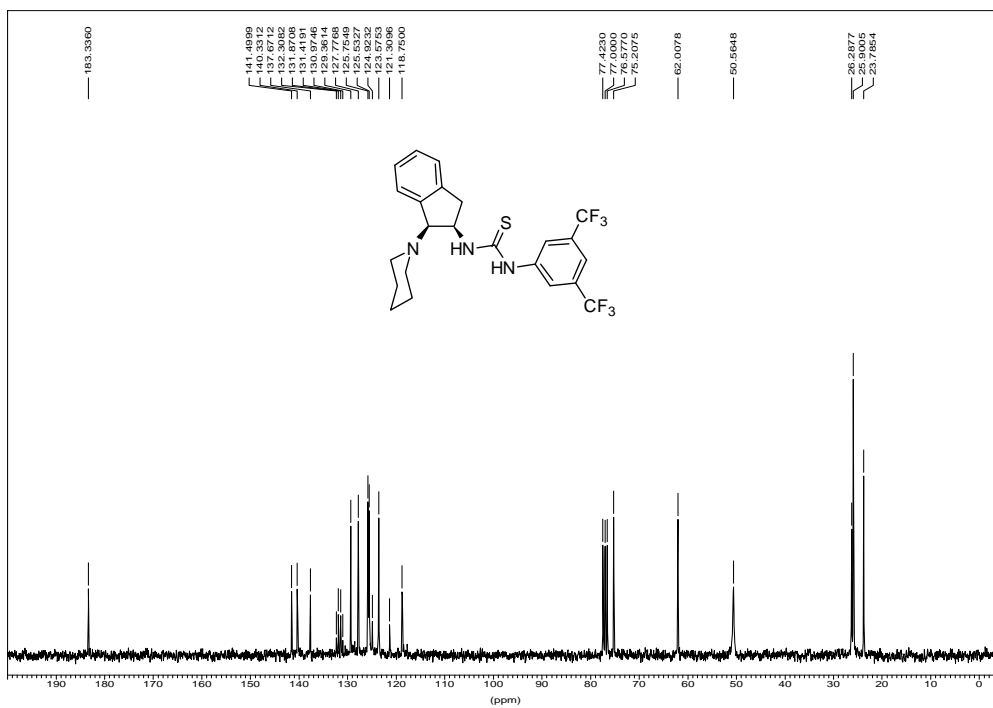

Compound **3a**

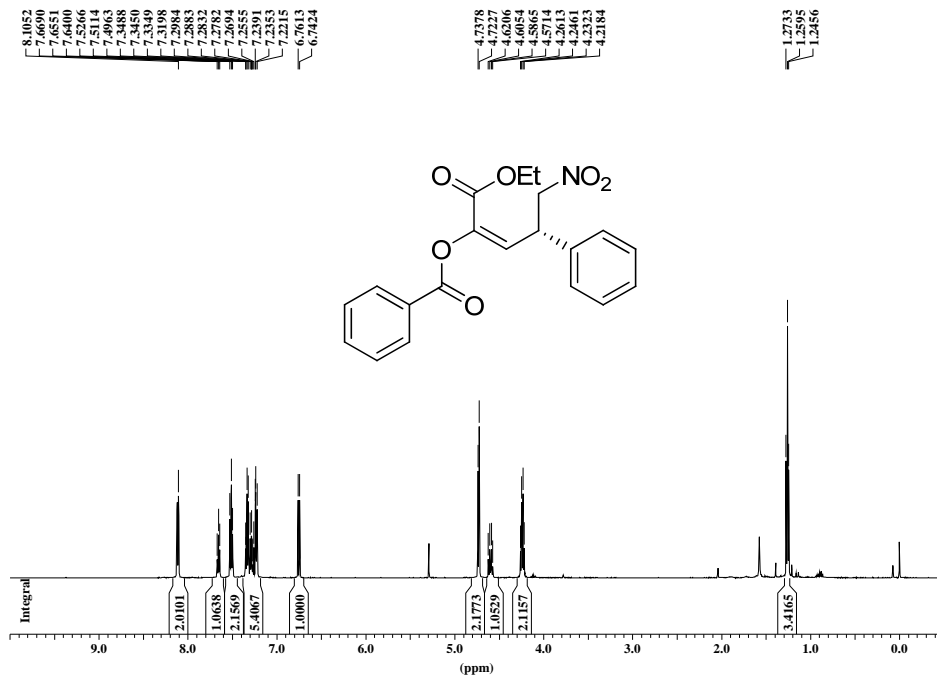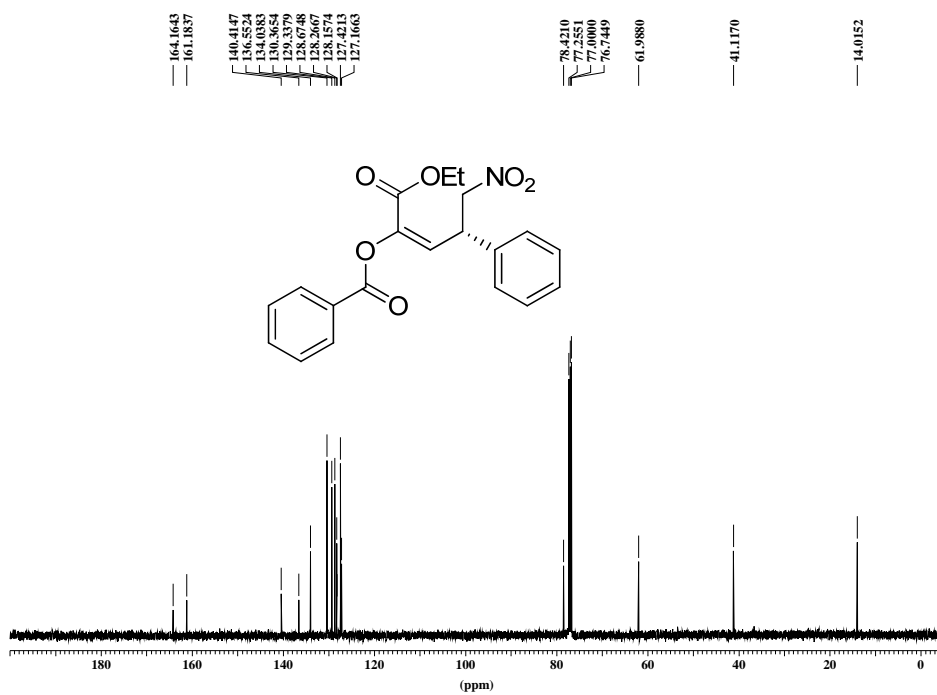

Compound **3b**

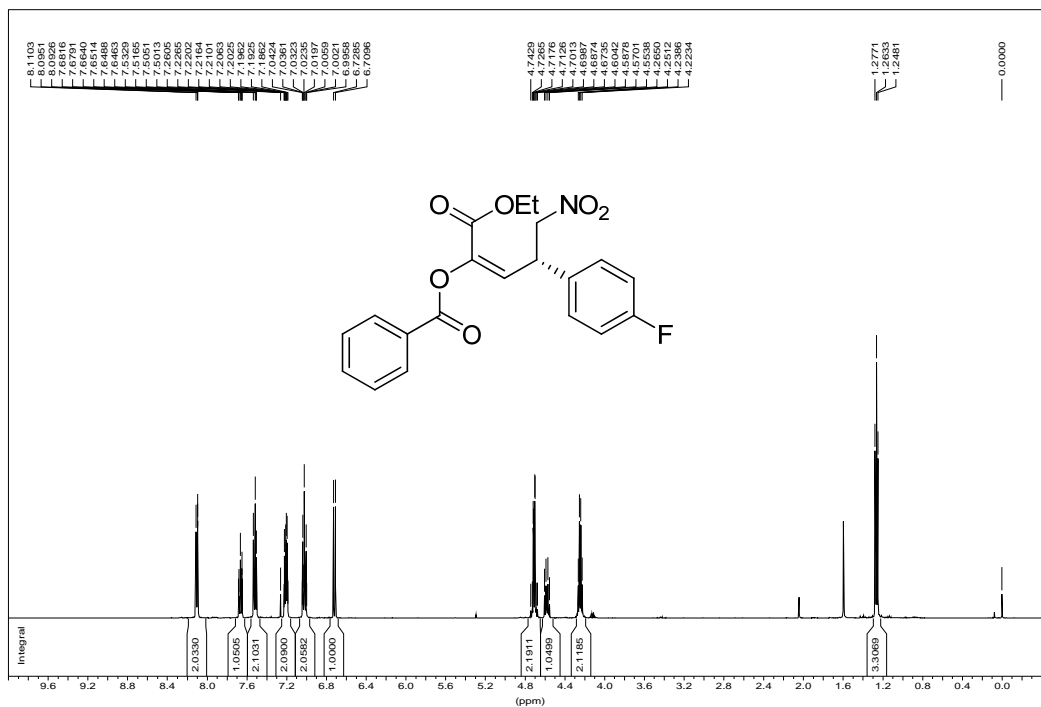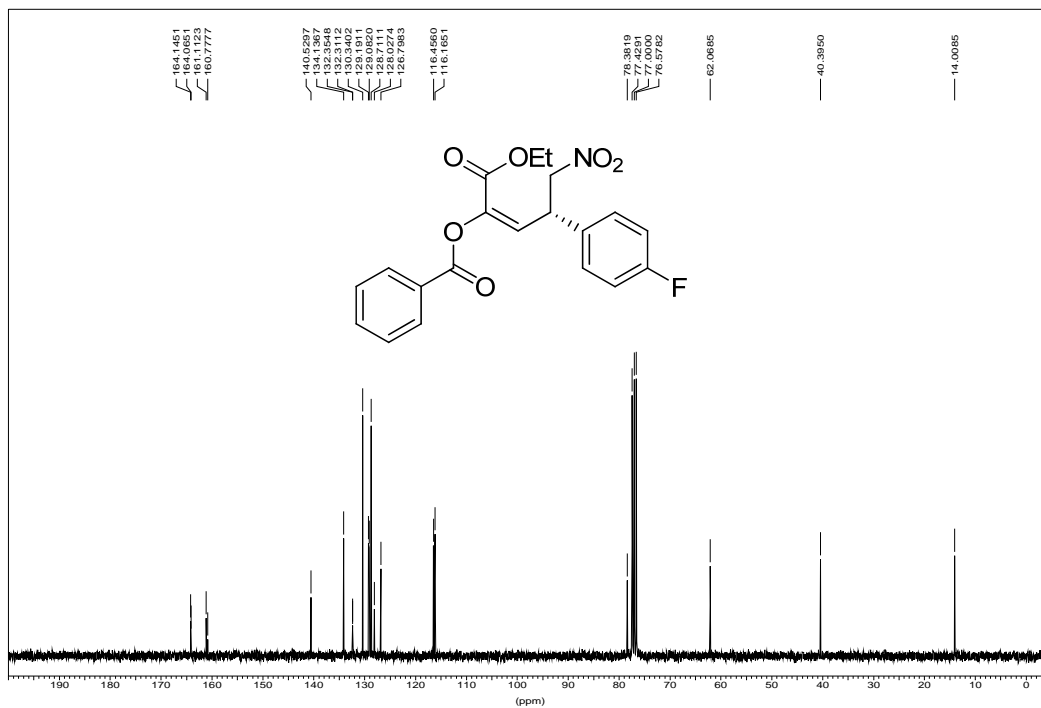

Compound **3c**

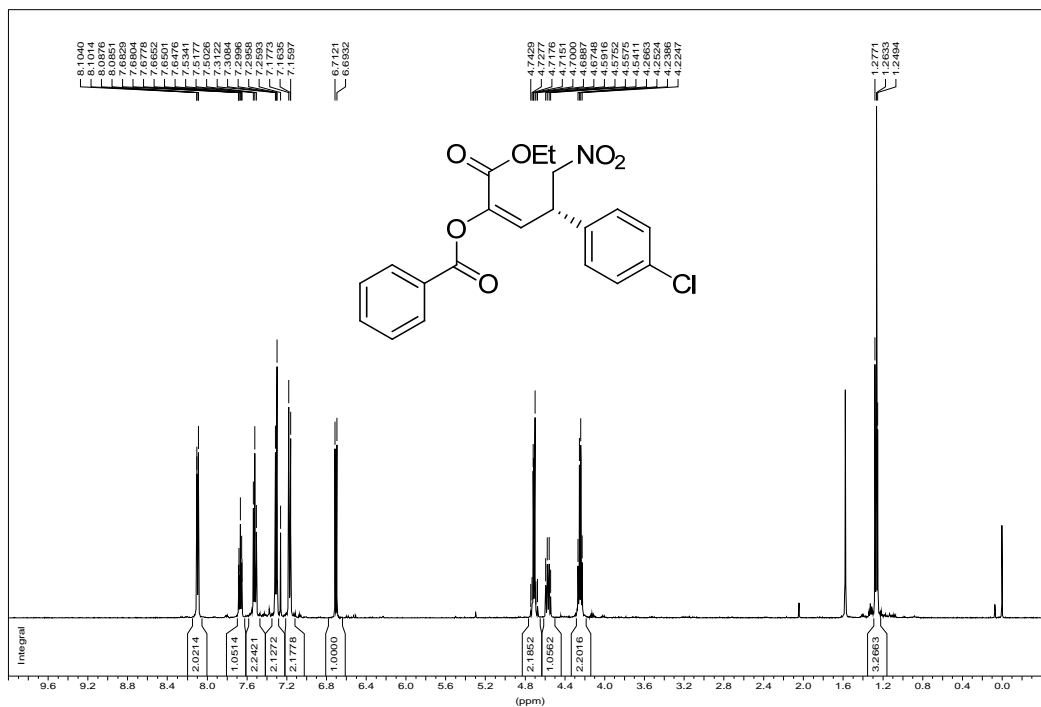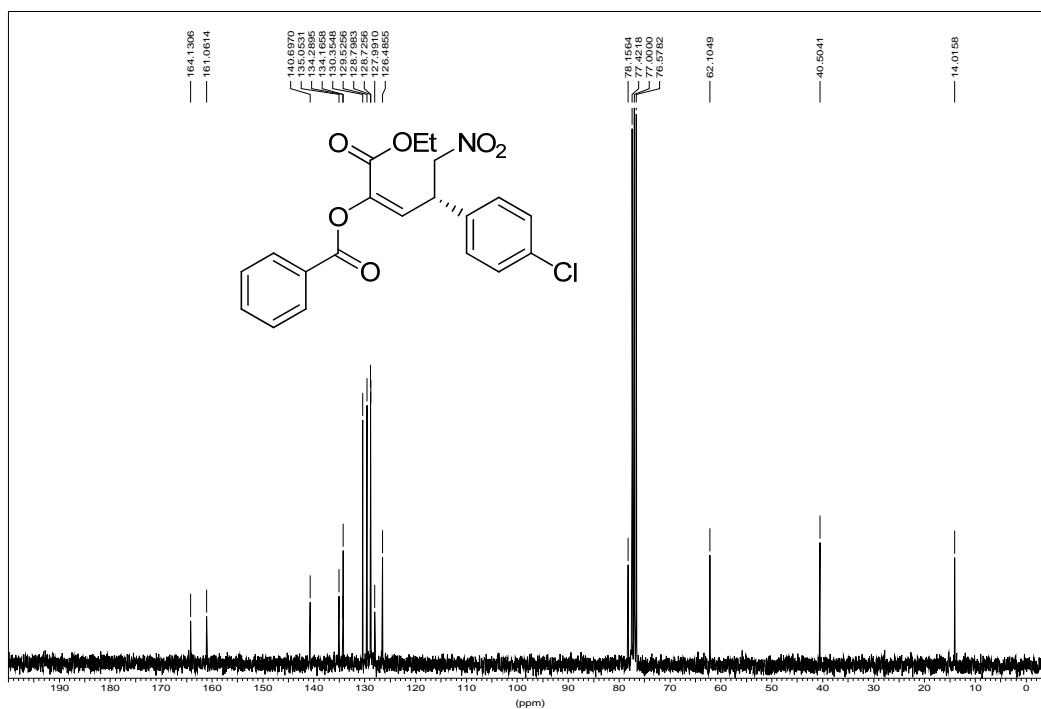

Compound **3d**

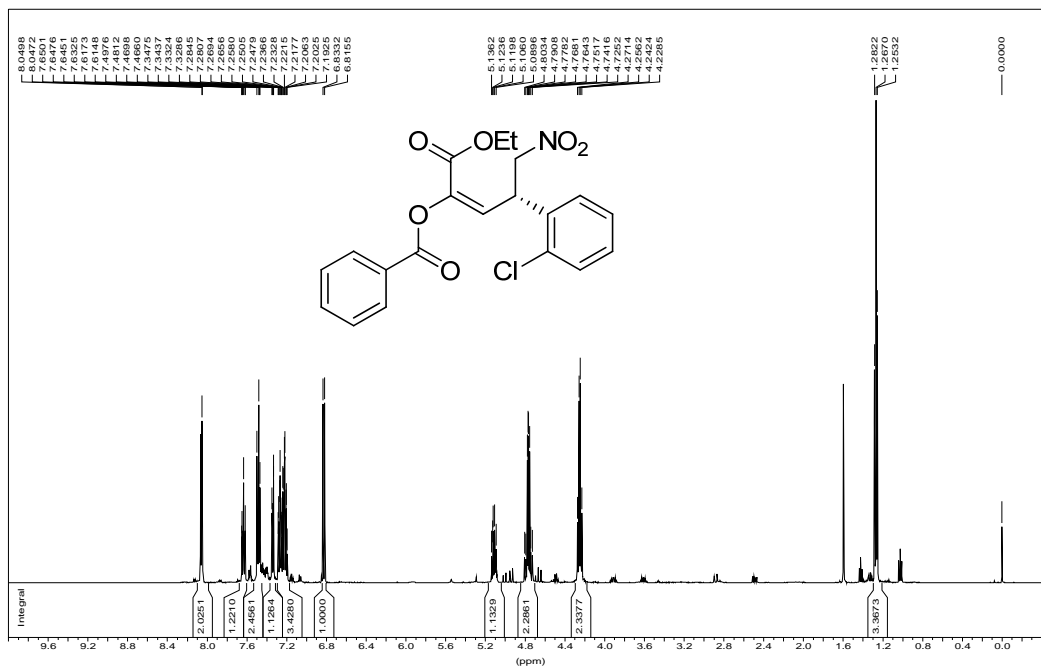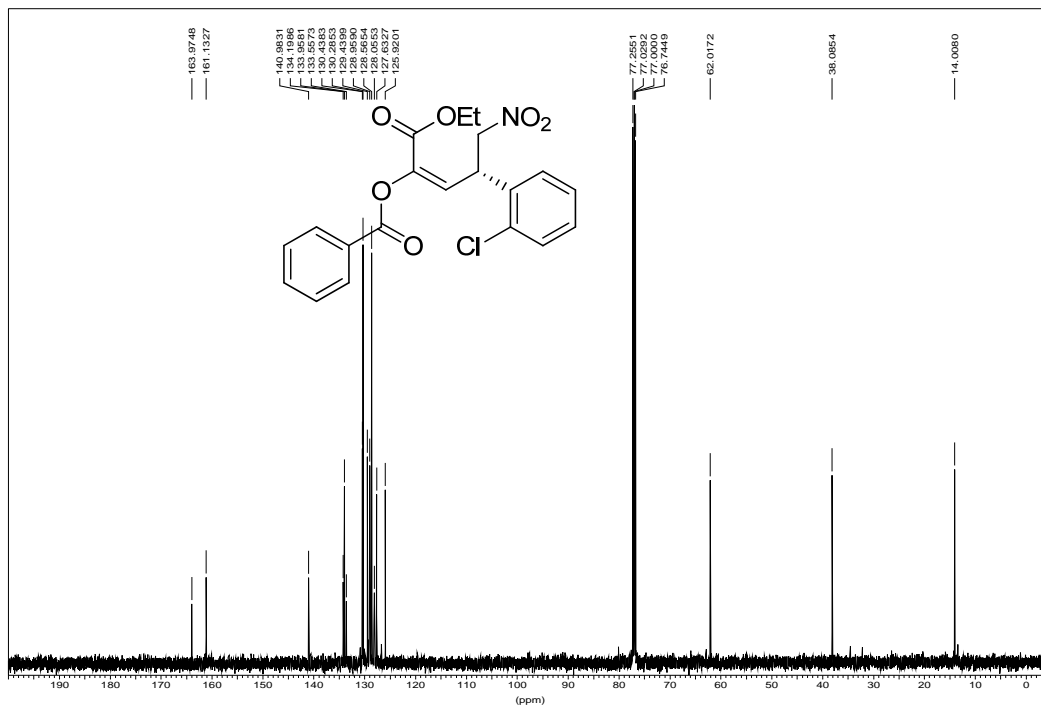



Compound **3e**

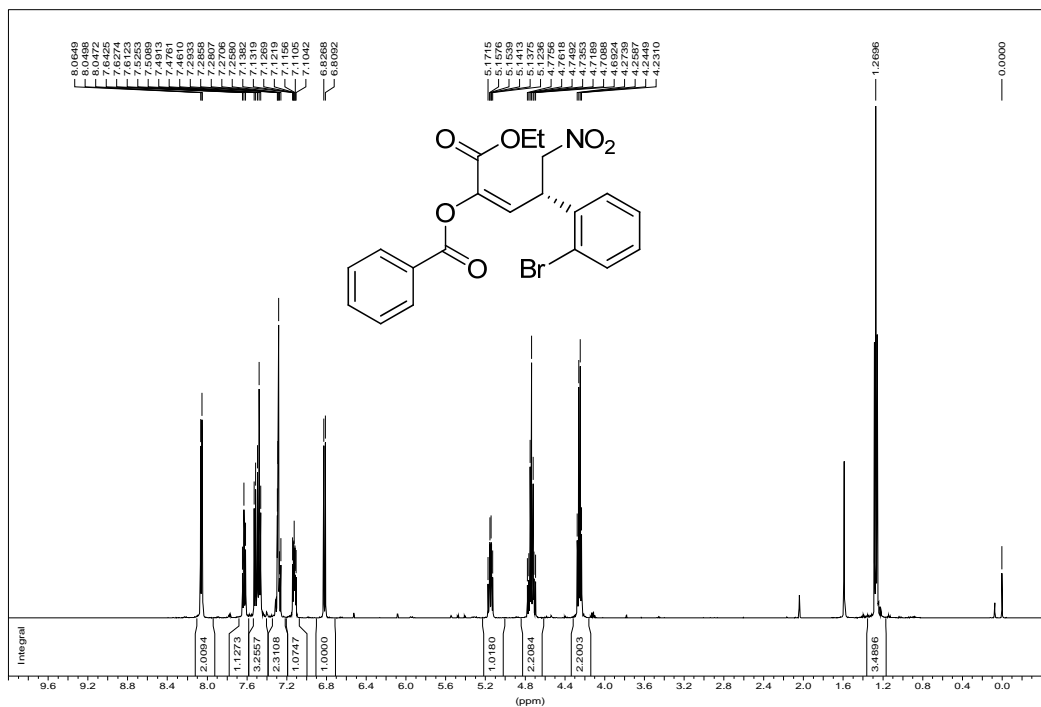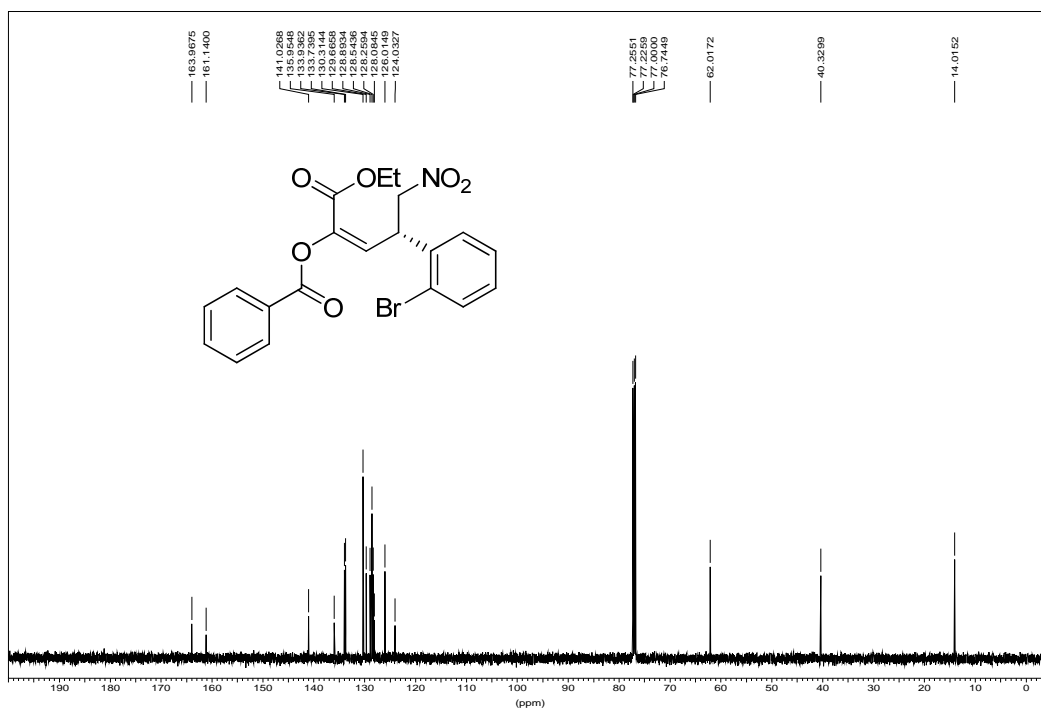

Compound **3f**

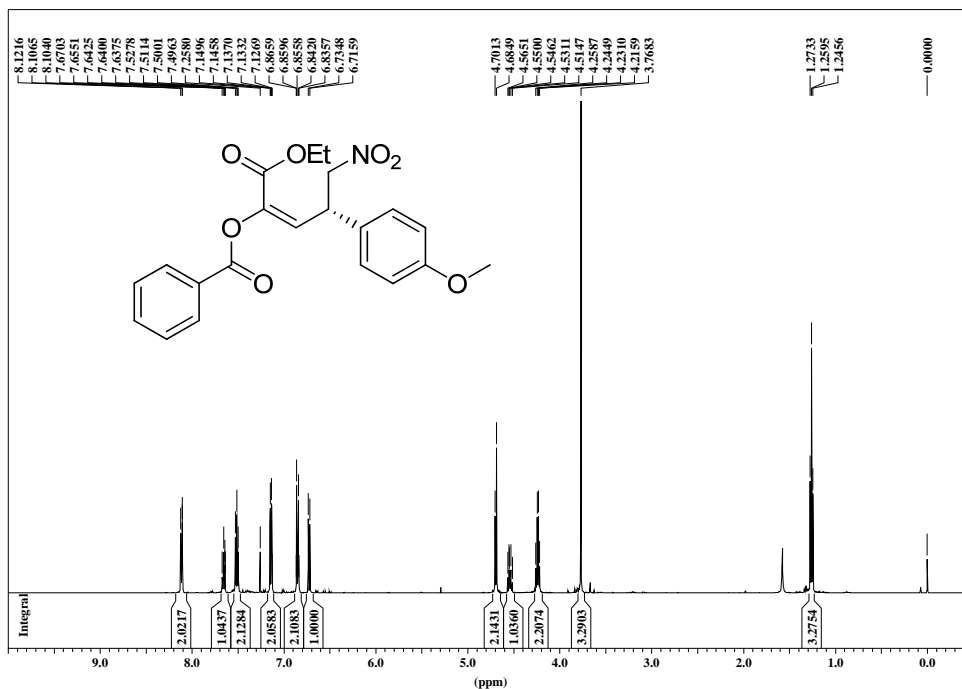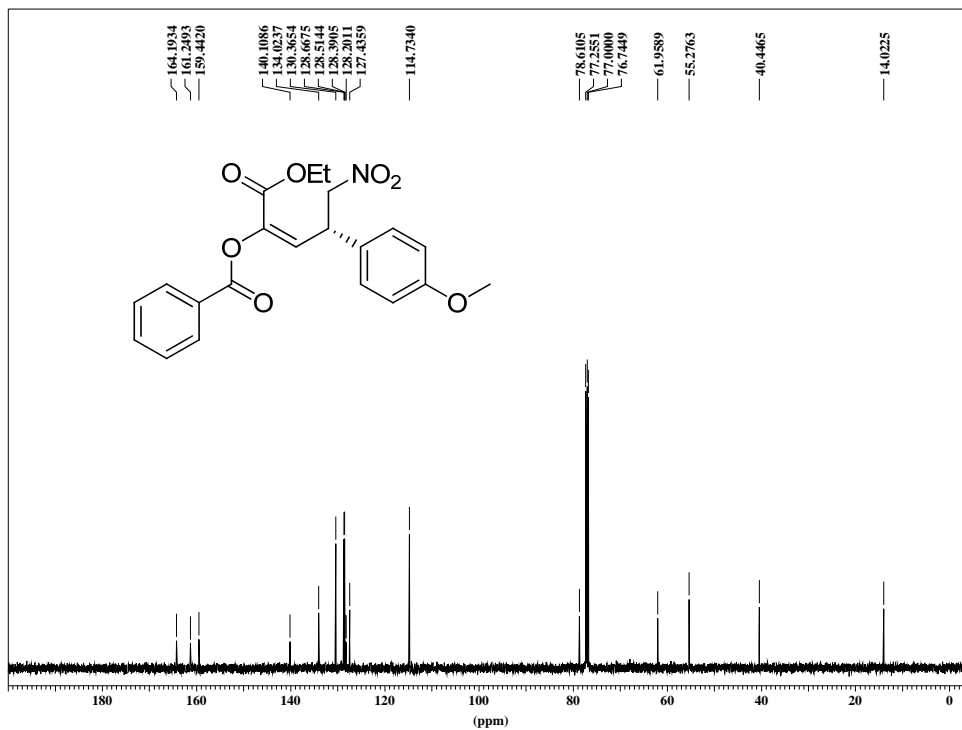

Compound **3g**

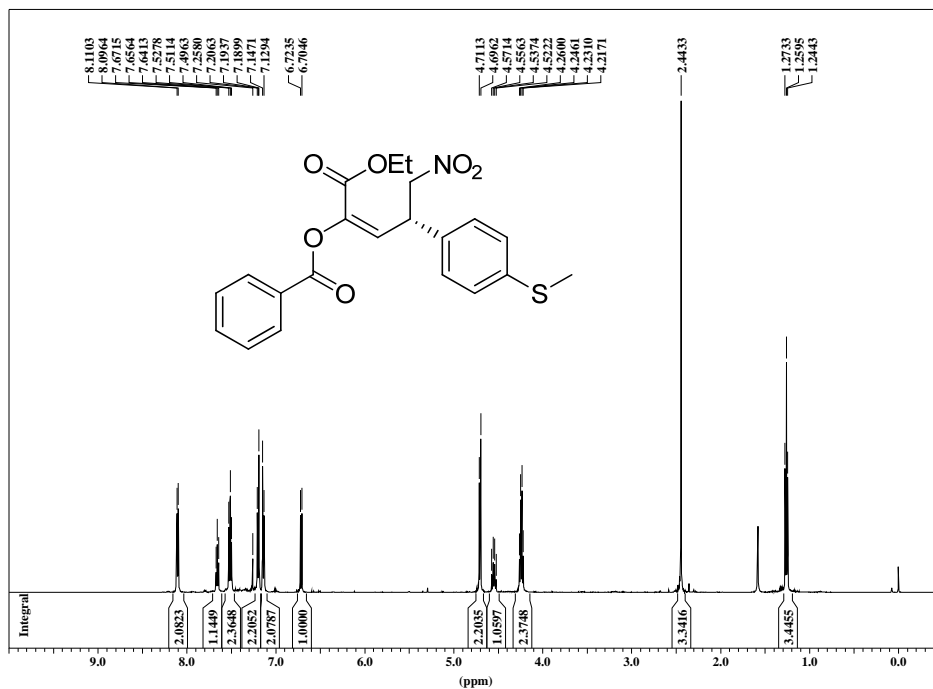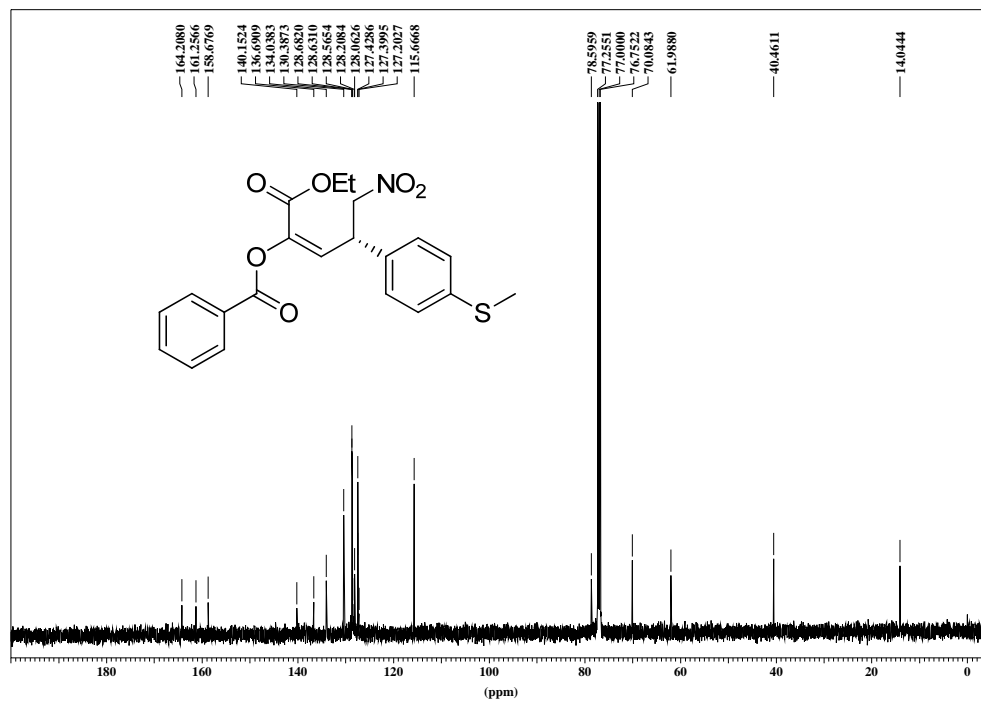

Compound **3h**

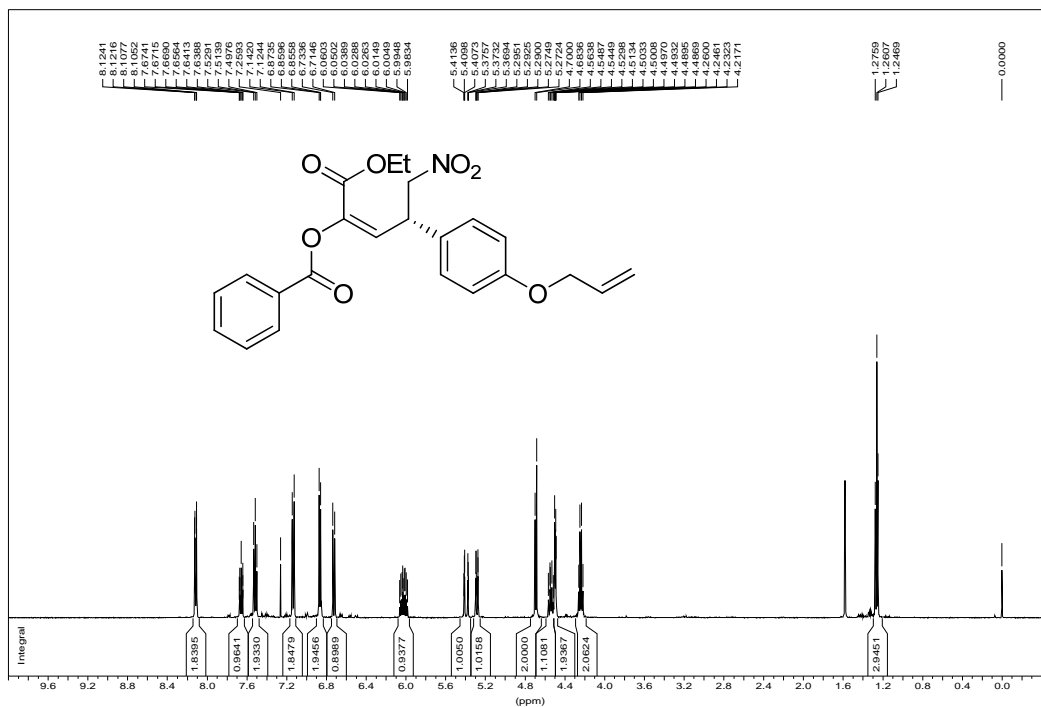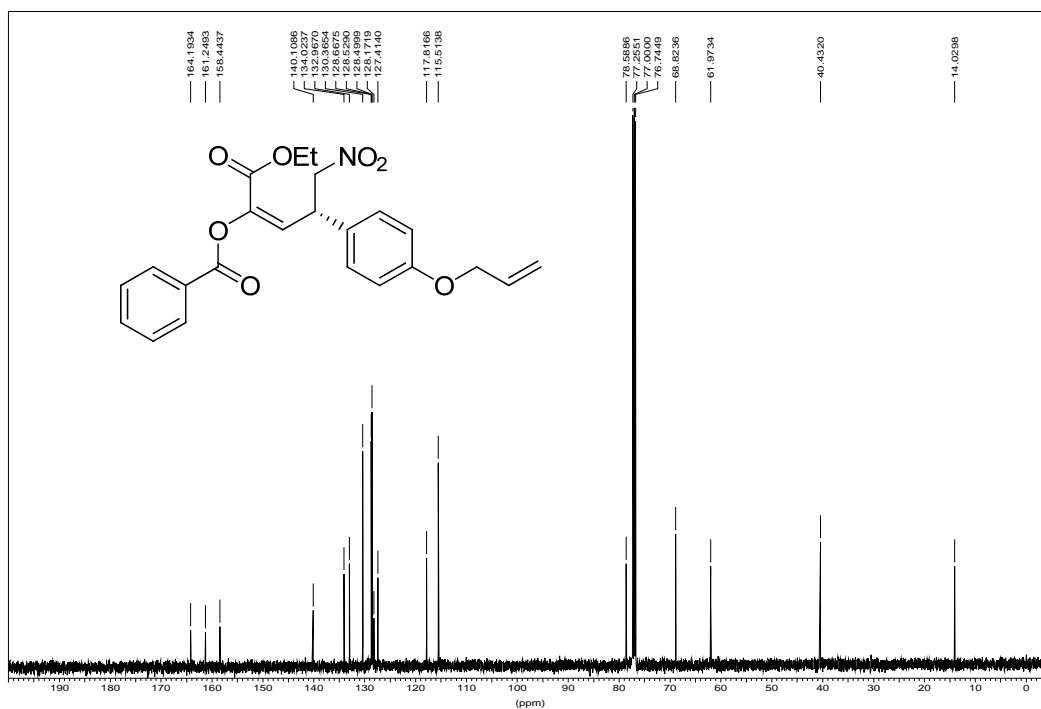

Compound **3i**

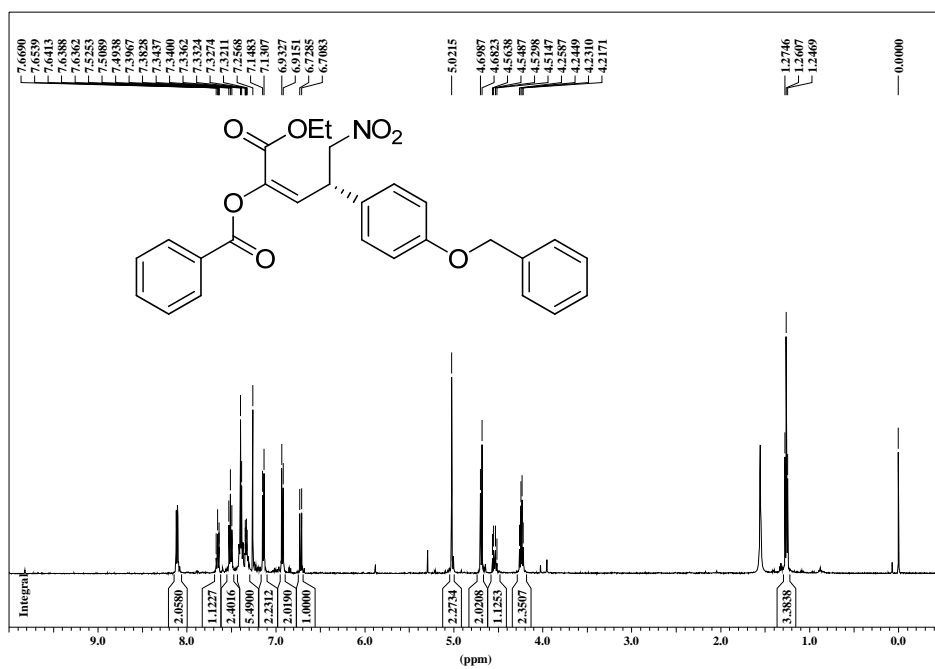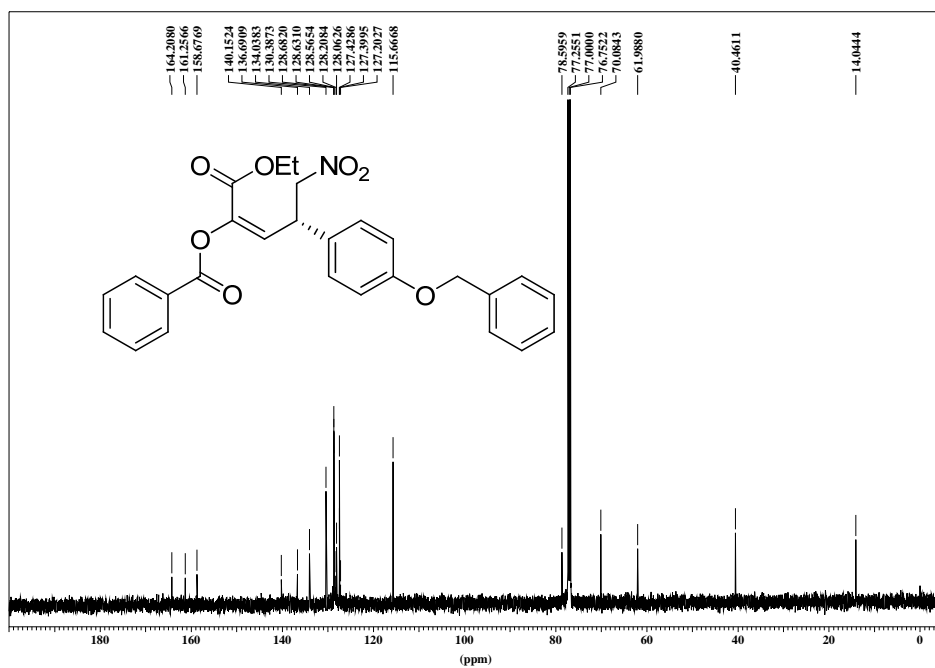

Compound **3j**

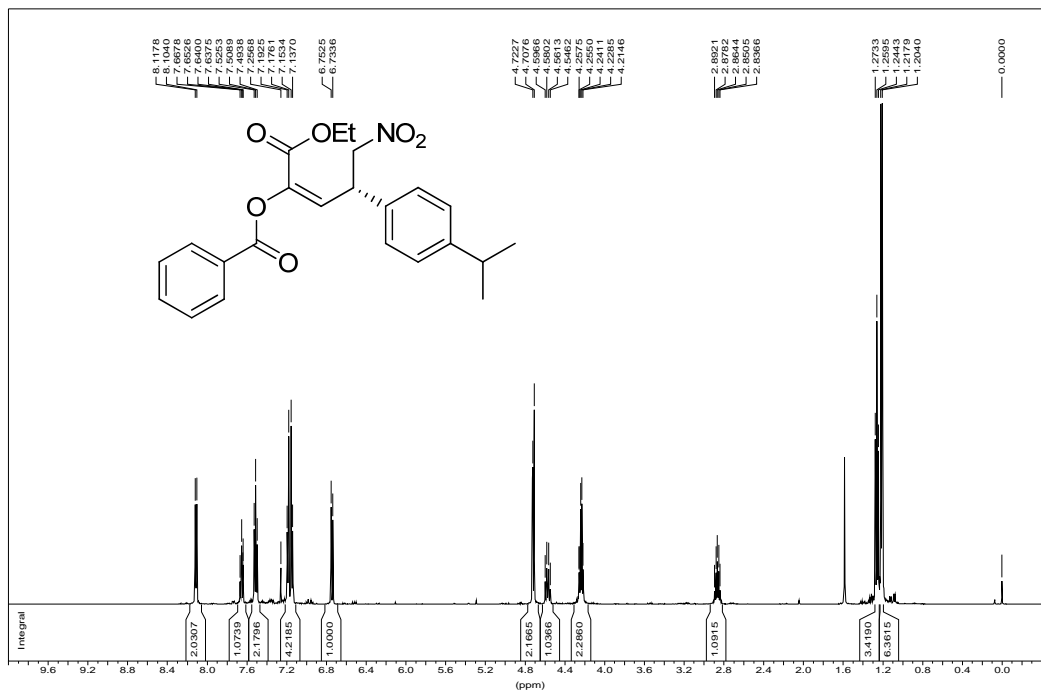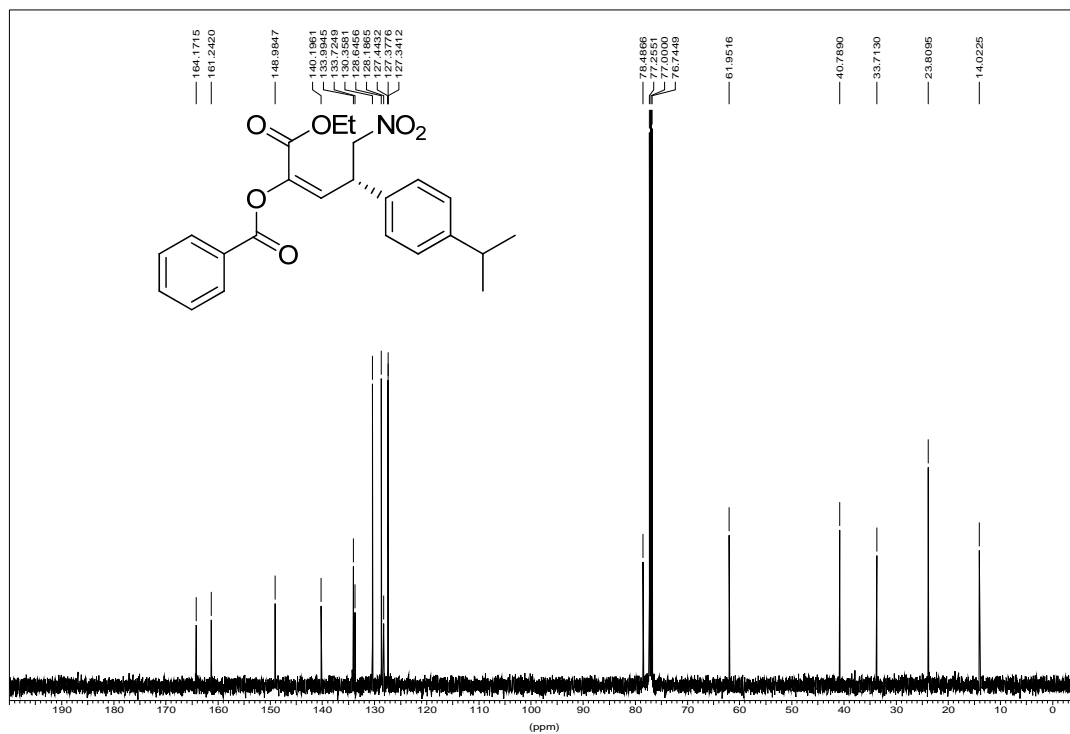

Compound **3k**

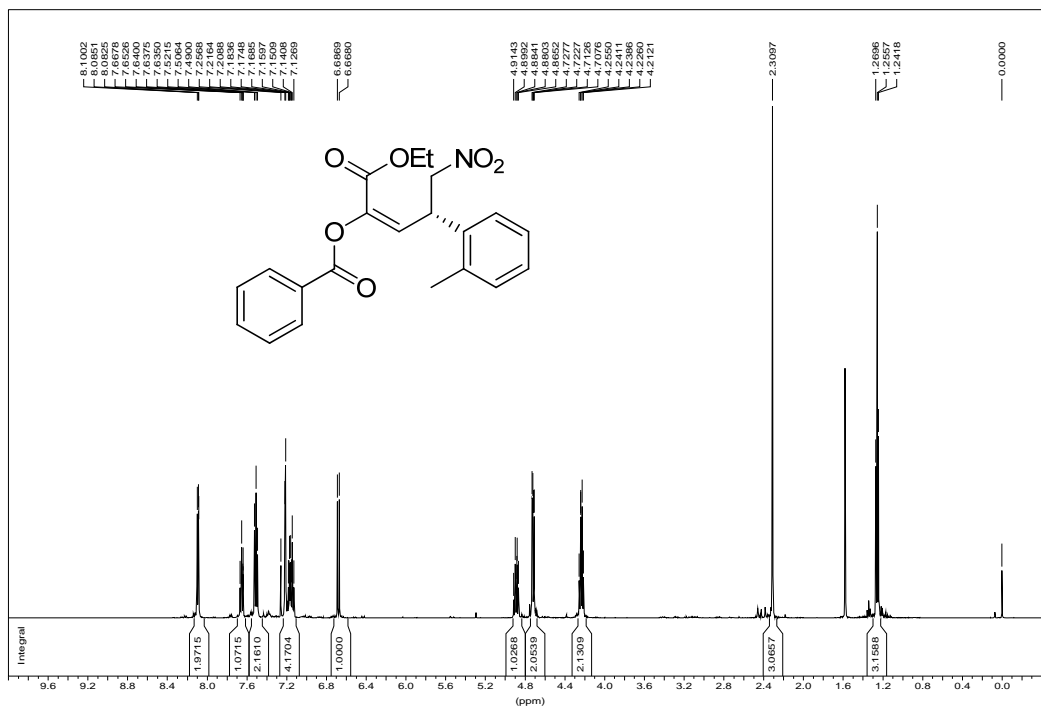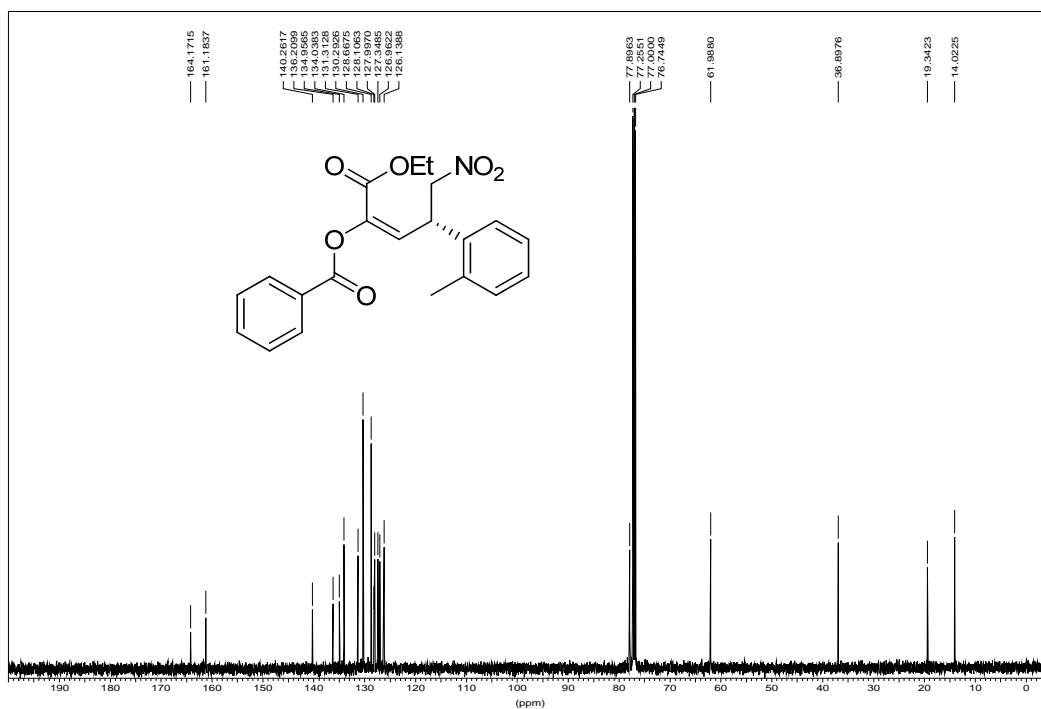

Compound **3I**

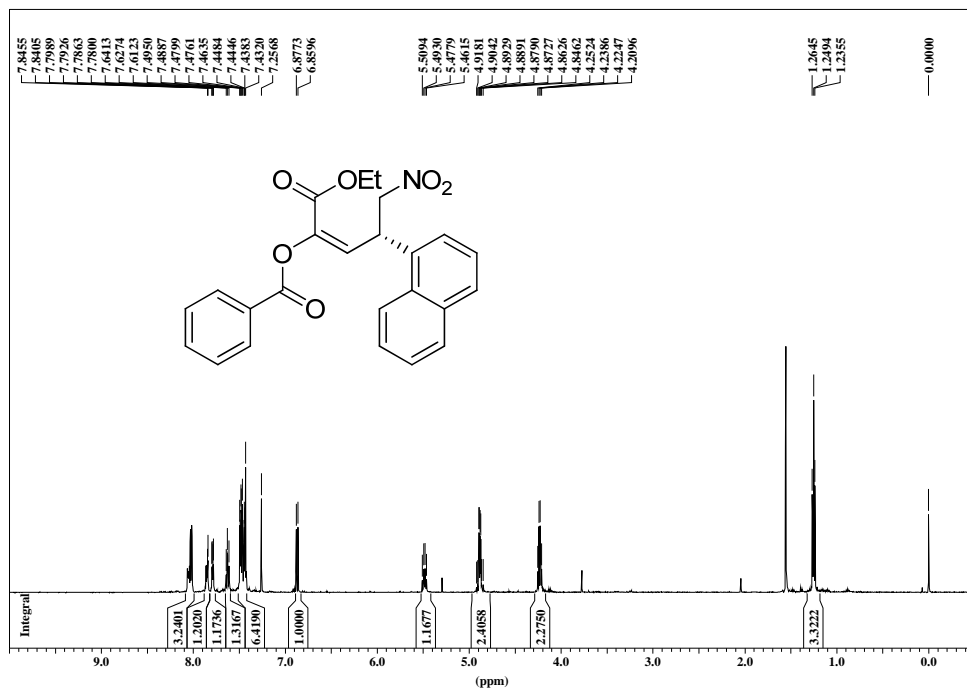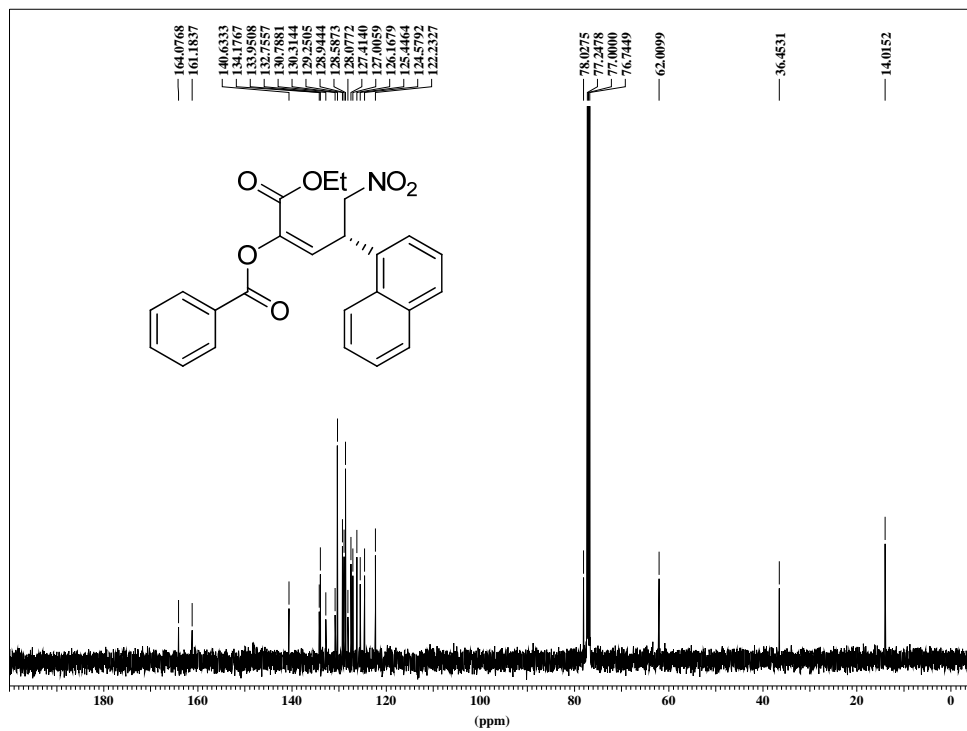



Compound **3m**

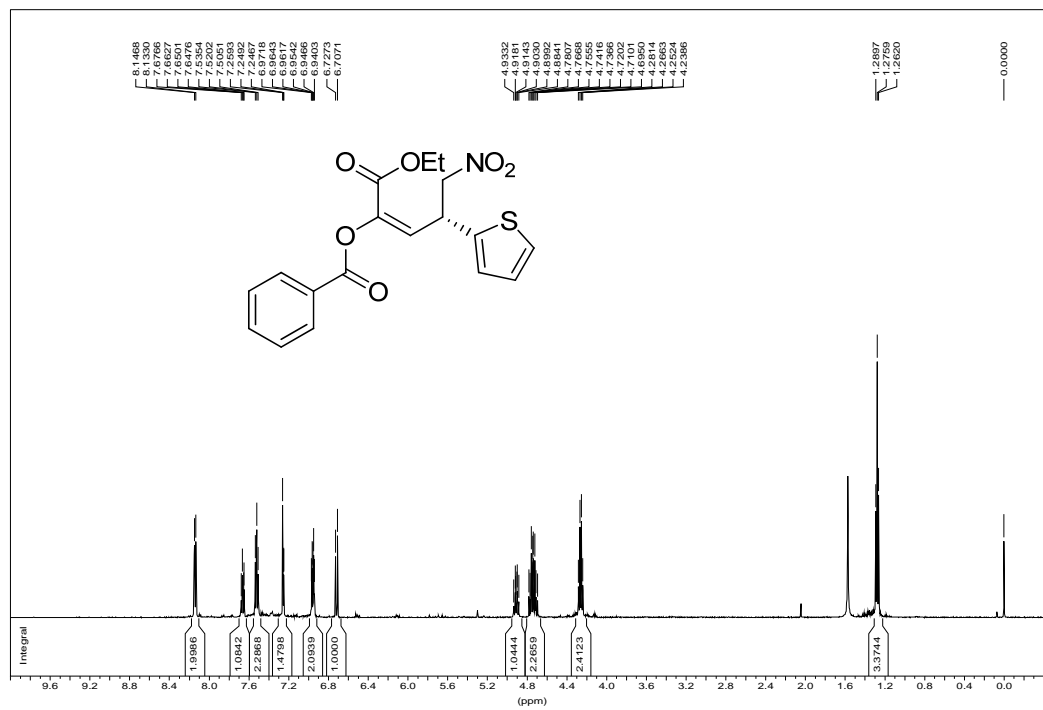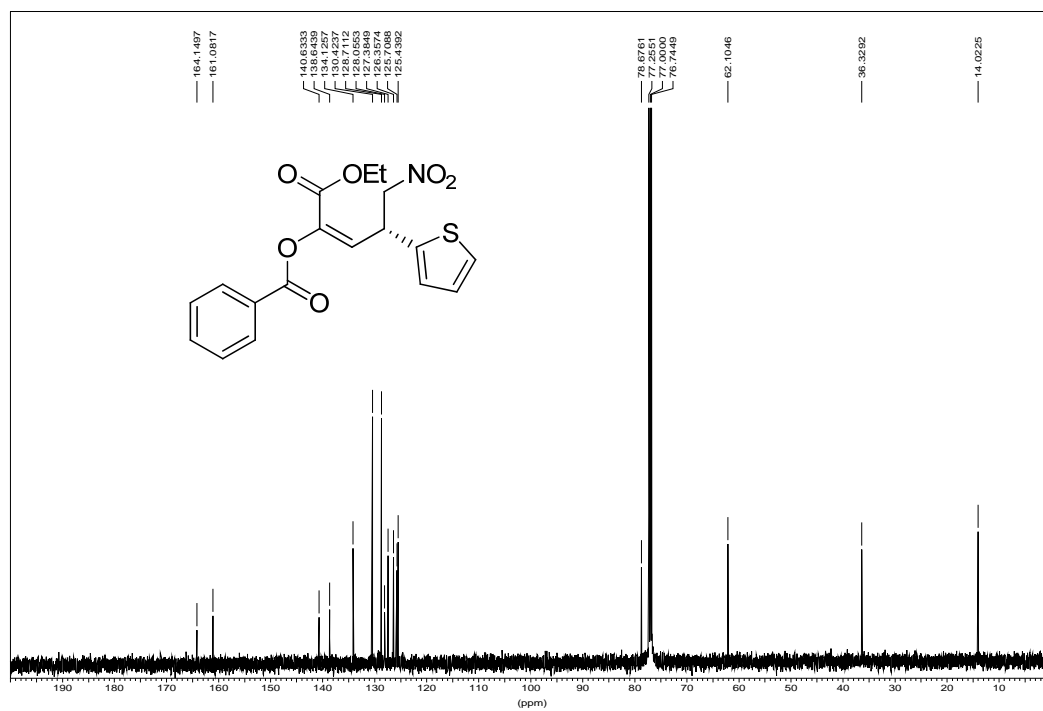

Compound **3n**

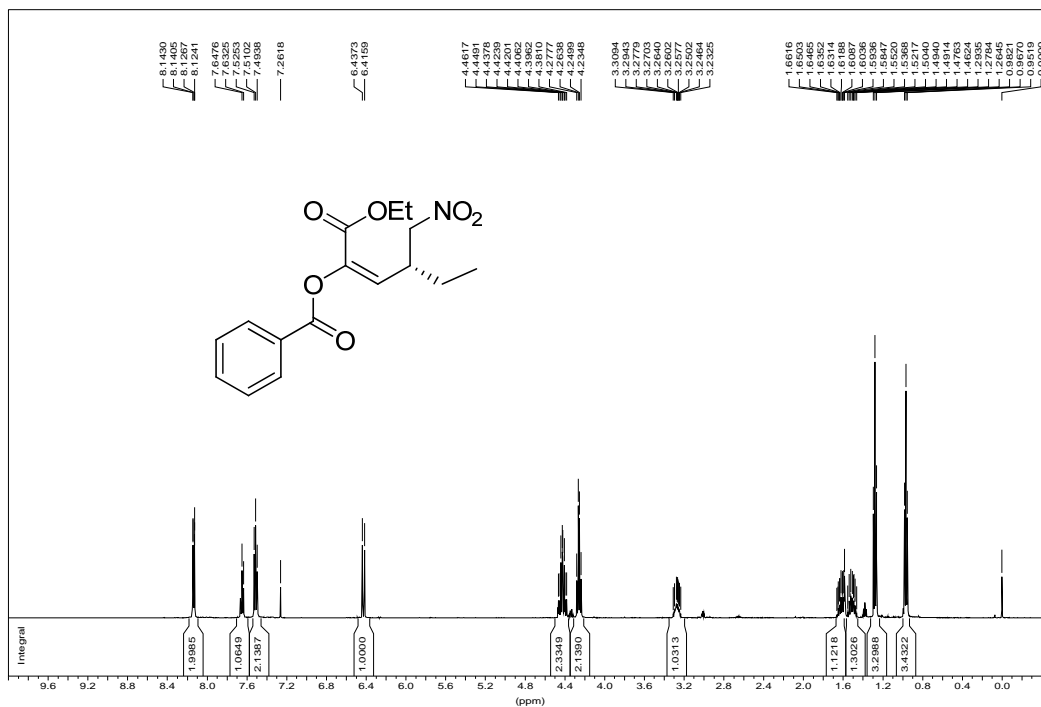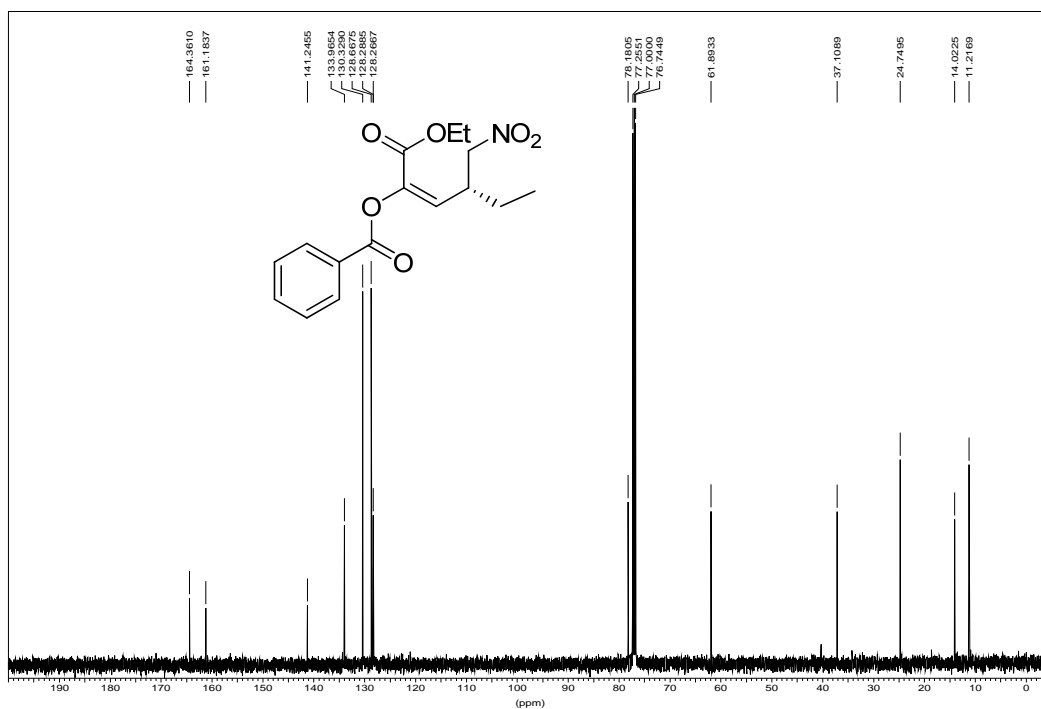

Compound **3o**

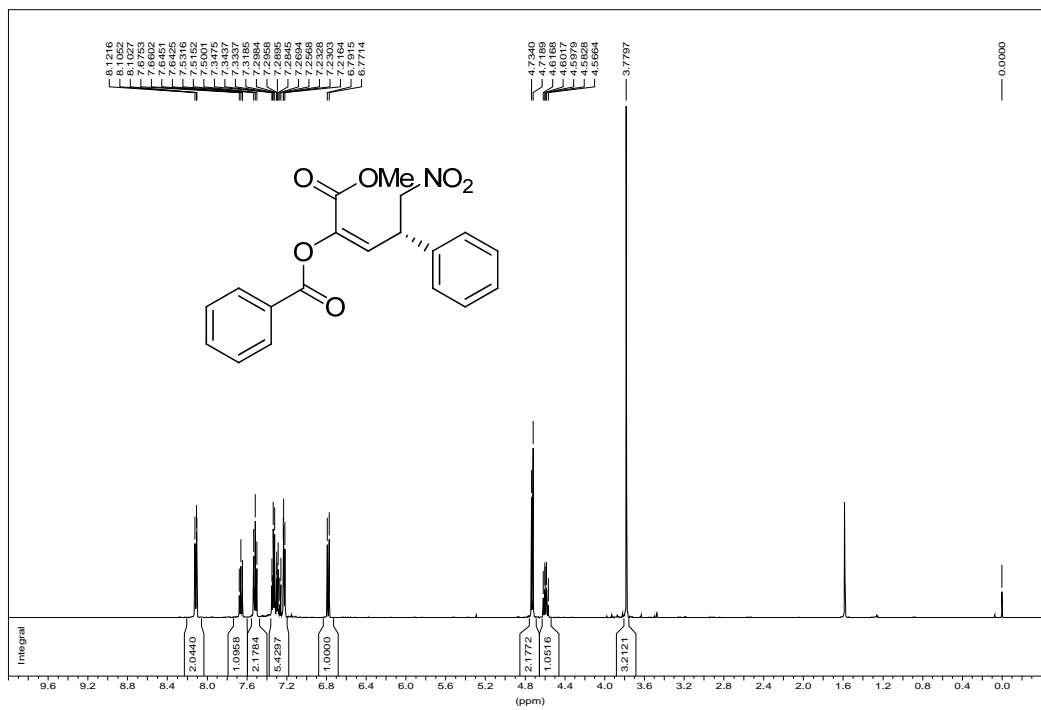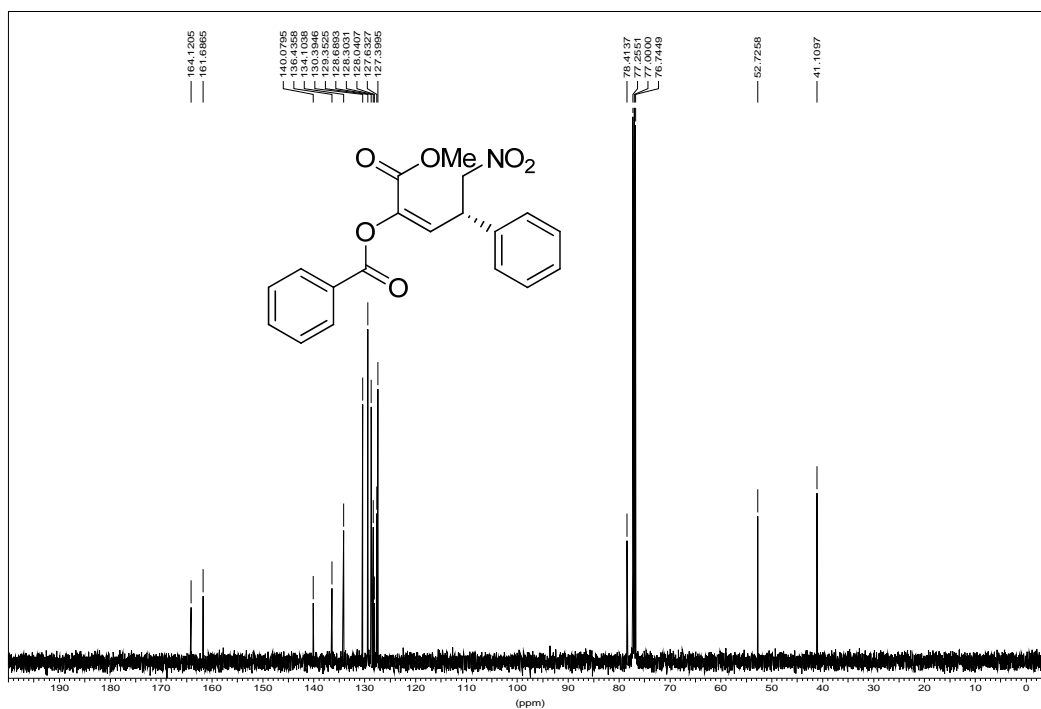

Compound **3p**

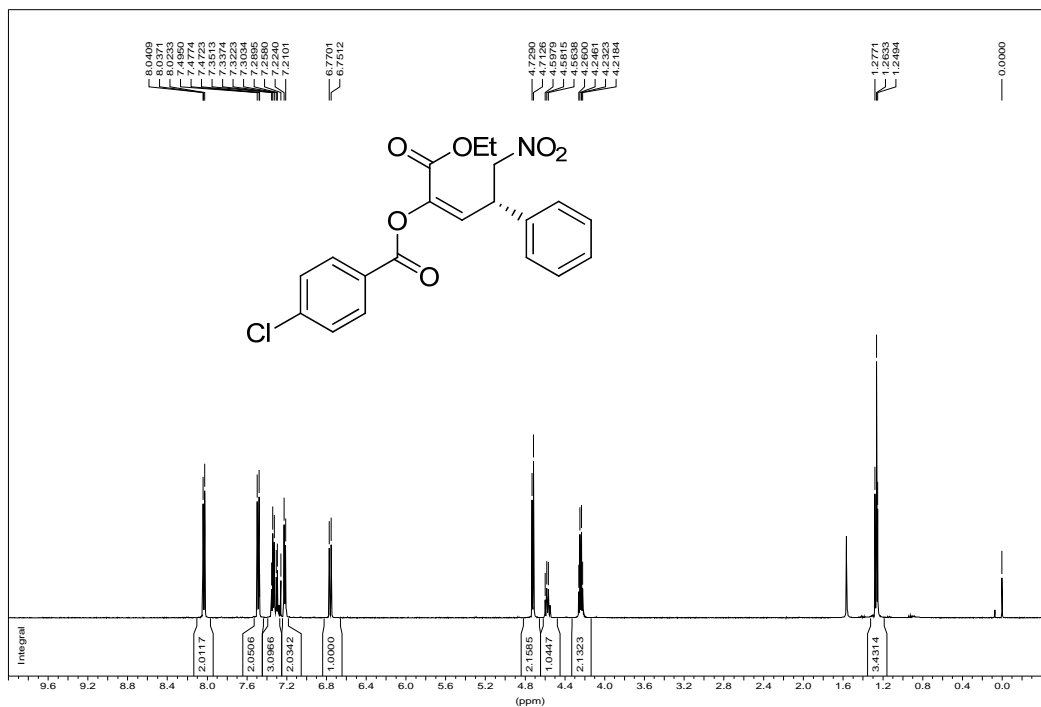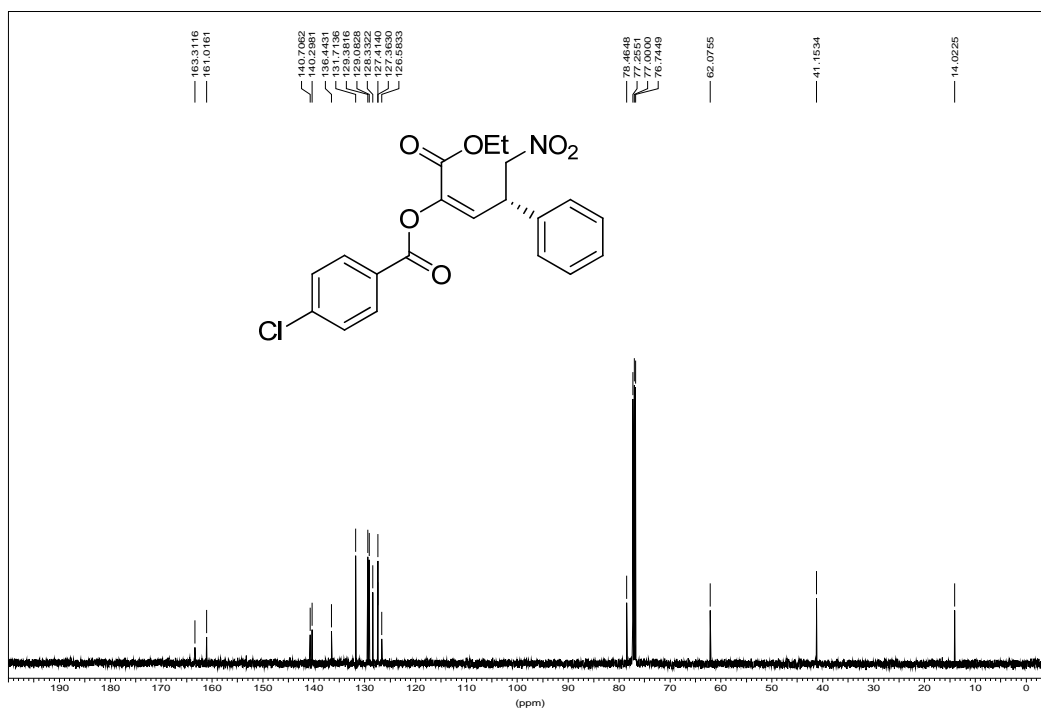

Compound **3q**

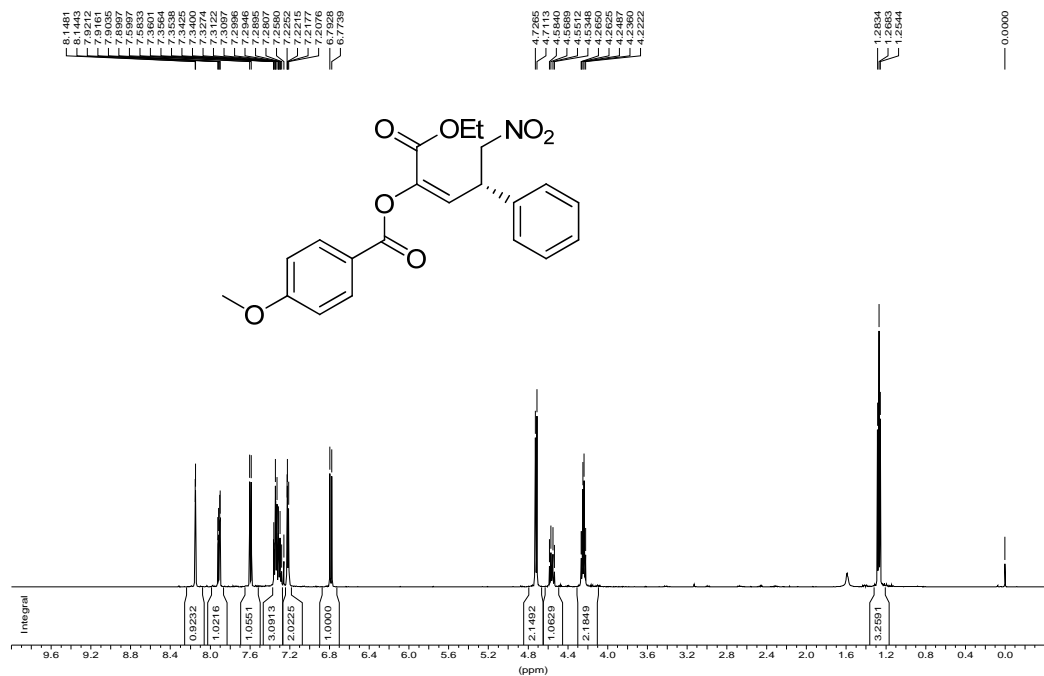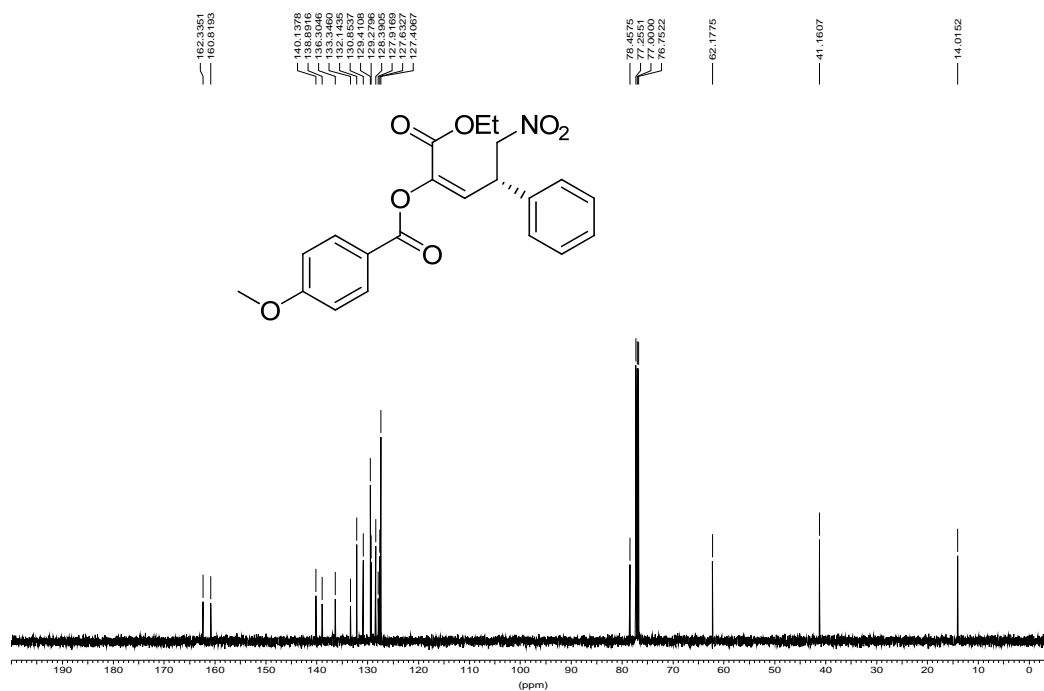

Compound **3r**

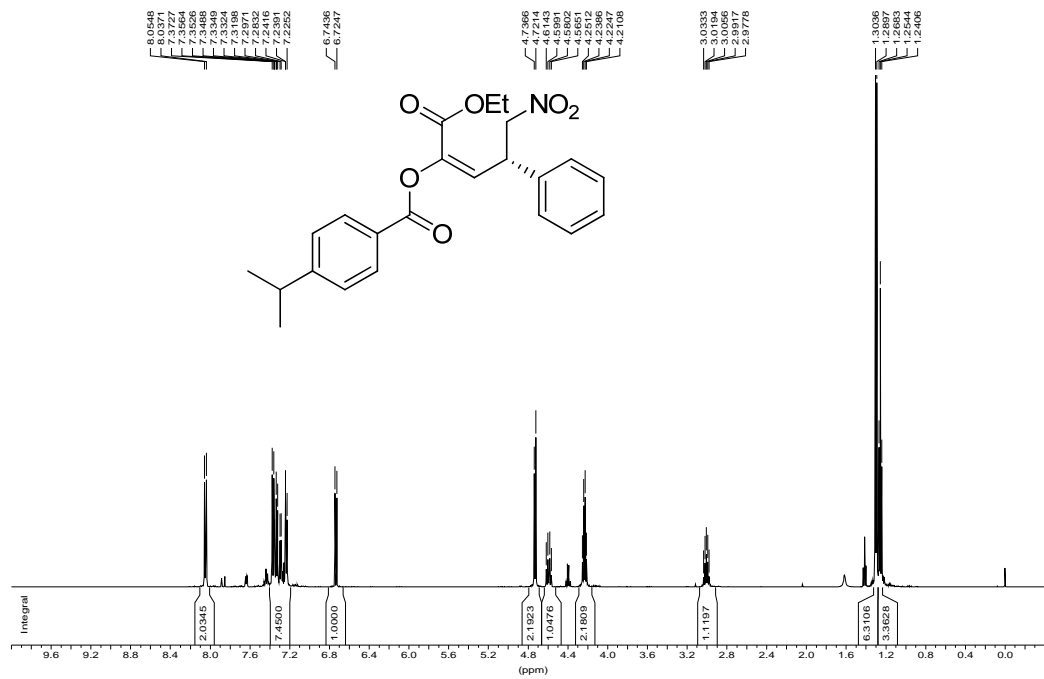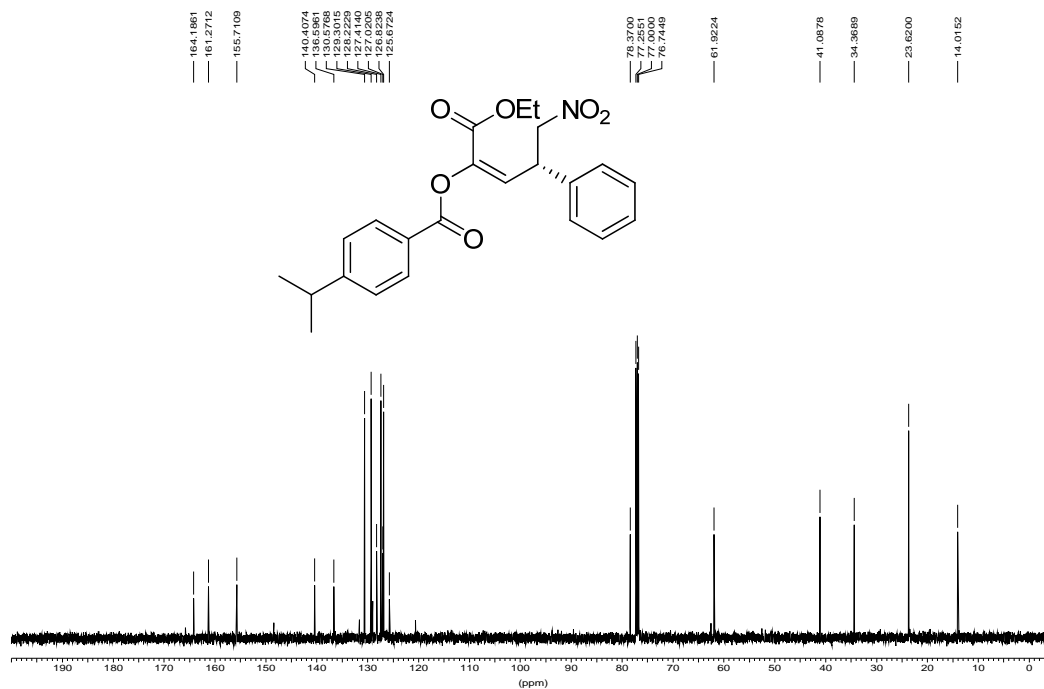

### Compound 3s

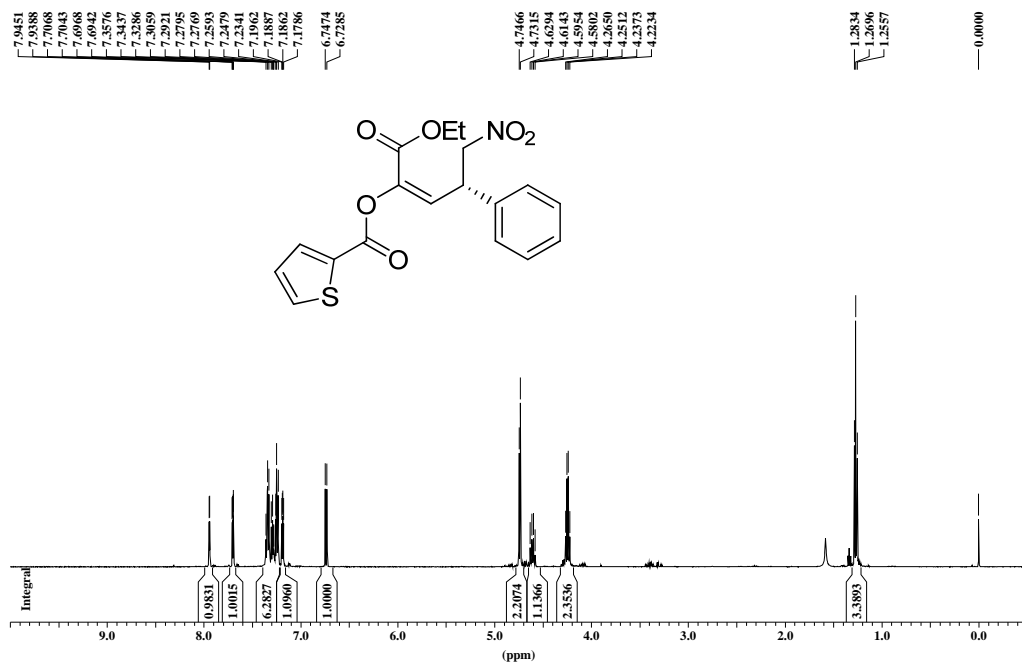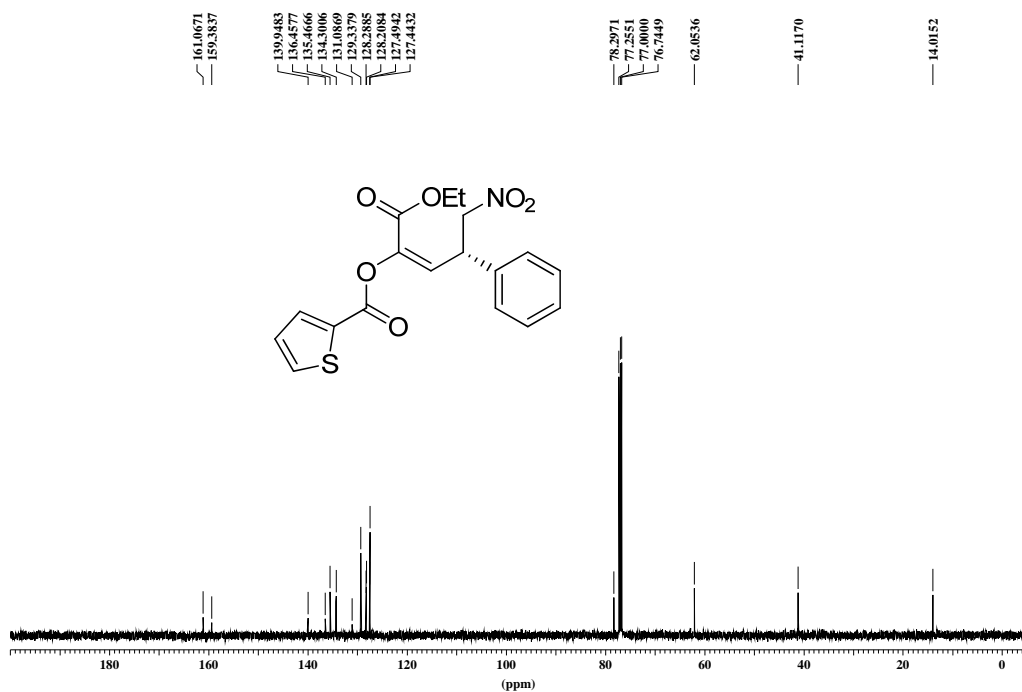

Compound **3t**

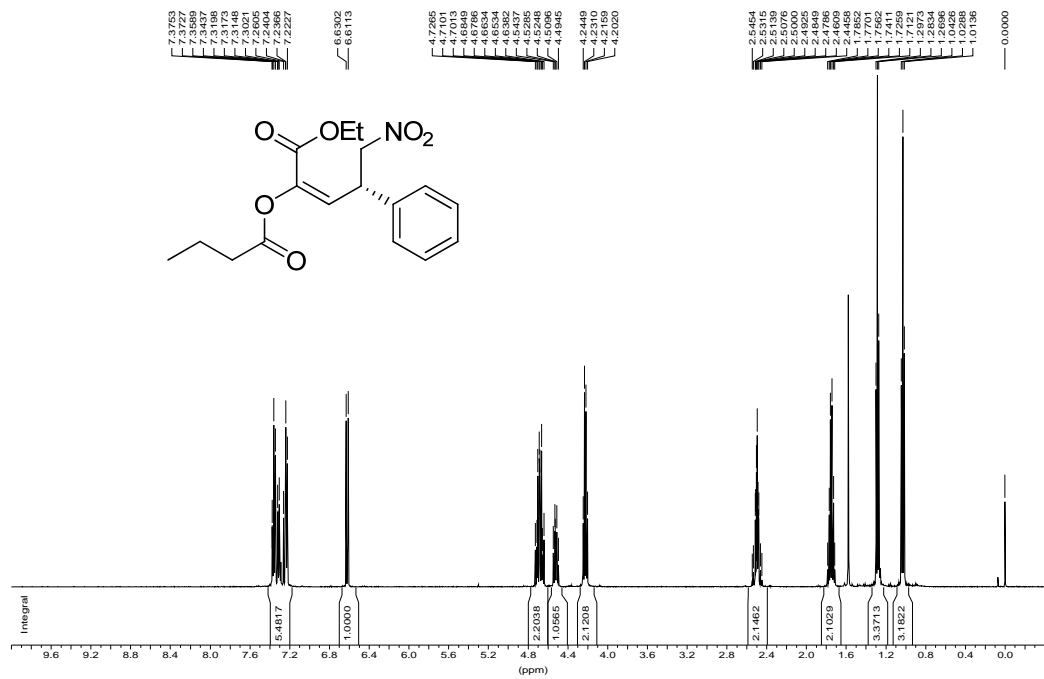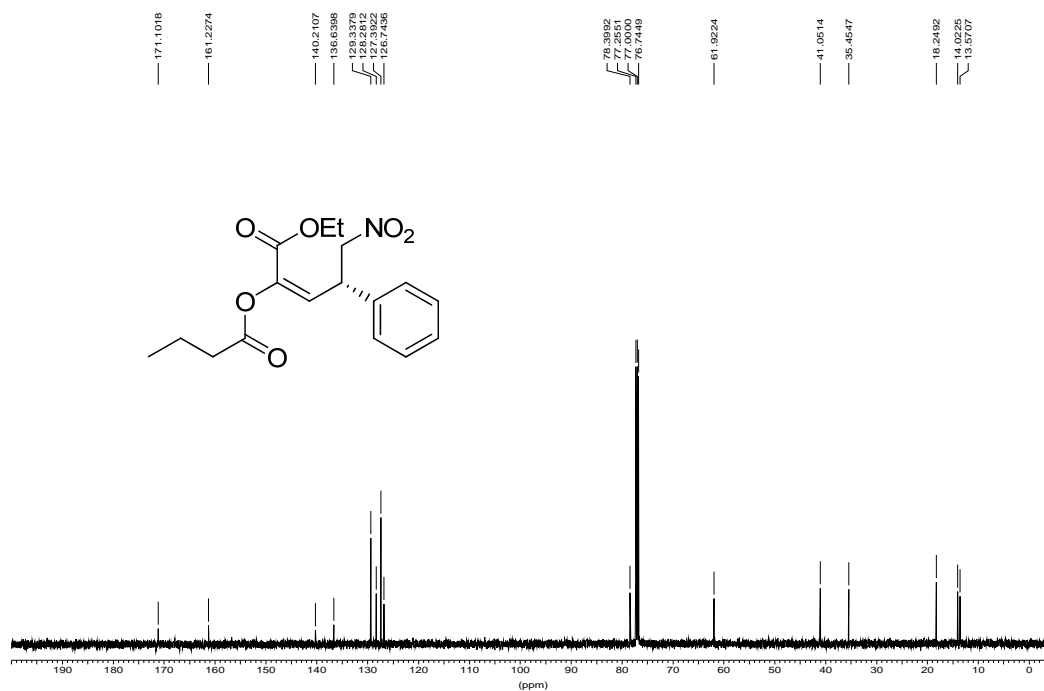



Compound **3u**

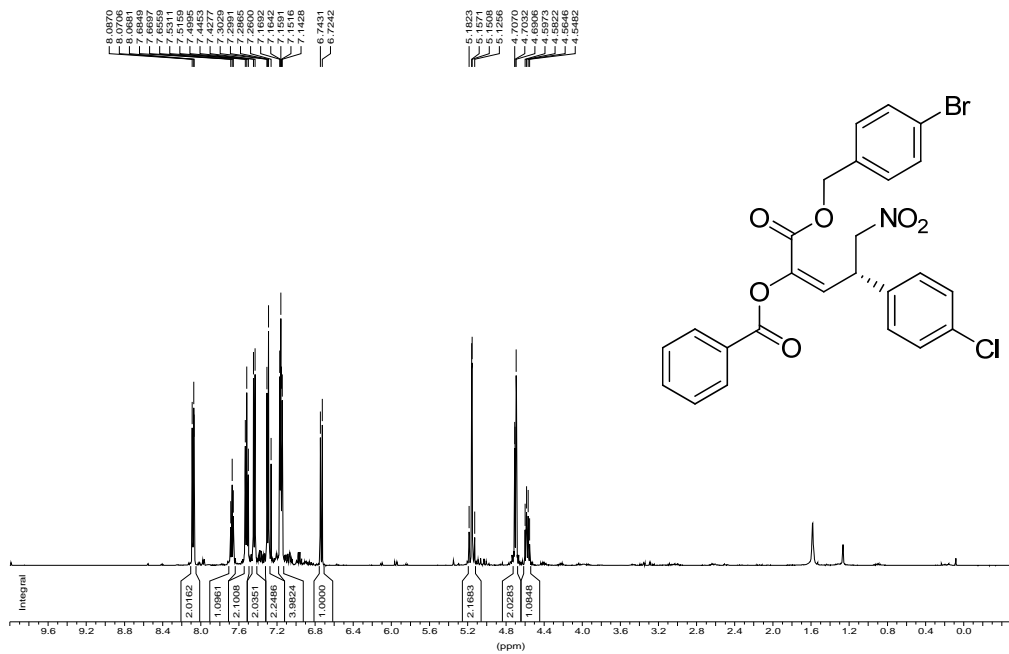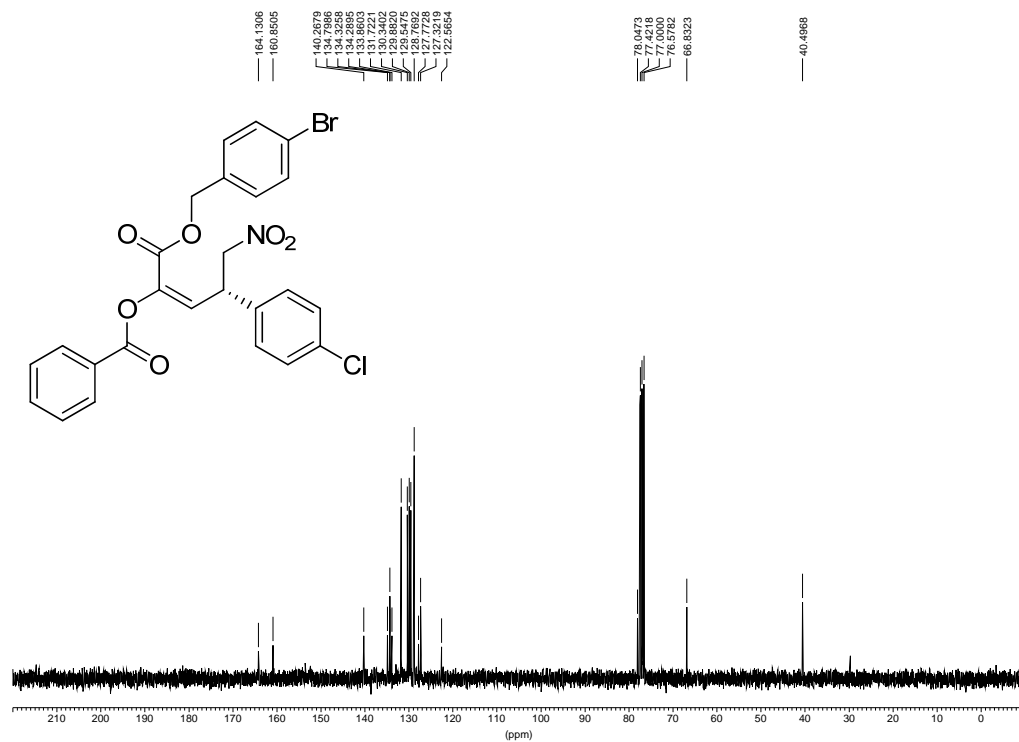

Compound 3a

==== Shimadzu LCsolution Analysis Report ====

Acquired by : Admin  
Sample Name : GE049  
Sample ID : GYJ  
Data File Name : G524.lcd  
Method File Name : 20%IPA, 1ml-min, 40min.lcm  
Batch File Name :  
Report File Name : Default.lcr  
Description : IC column with guard column 20%IPA

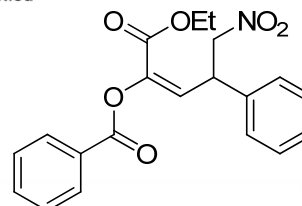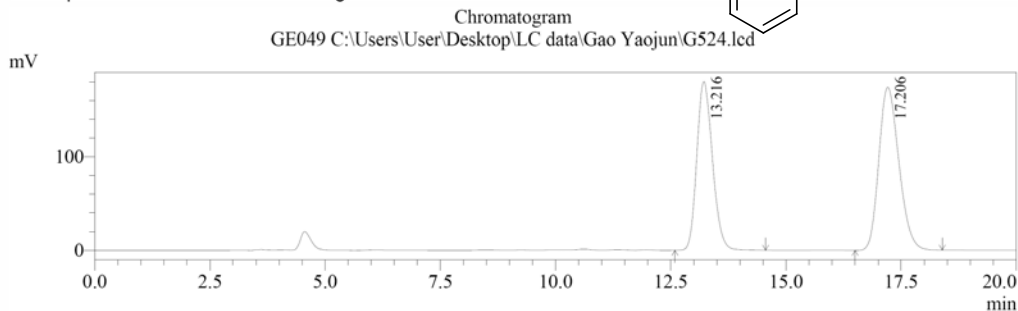

PeakTable

SPD-20A Ch1 254nm

| Peak# | Ret. Time | Area    | Height | Area %  | Height % |
|-------|-----------|---------|--------|---------|----------|
| 1     | 13.216    | 4268077 | 180252 | 44.718  | 50.830   |
| 2     | 17.206    | 5276367 | 174367 | 55.282  | 49.170   |
| Total |           | 9544443 | 354619 | 100.000 | 100.000  |

==== Shimadzu LCsolution Analysis Report ====

Acquired by : Admin  
Sample Name : GE075  
Sample ID : GYJ  
Data File Name : G545.lcd  
Method File Name : 20%IPA, 1ml-min, 40min.lcm  
Batch File Name :  
Report File Name : Default.lcr  
Description : IC column with guard column 20%IPA

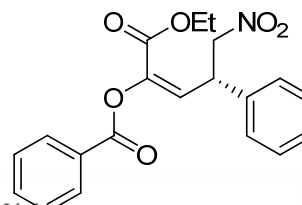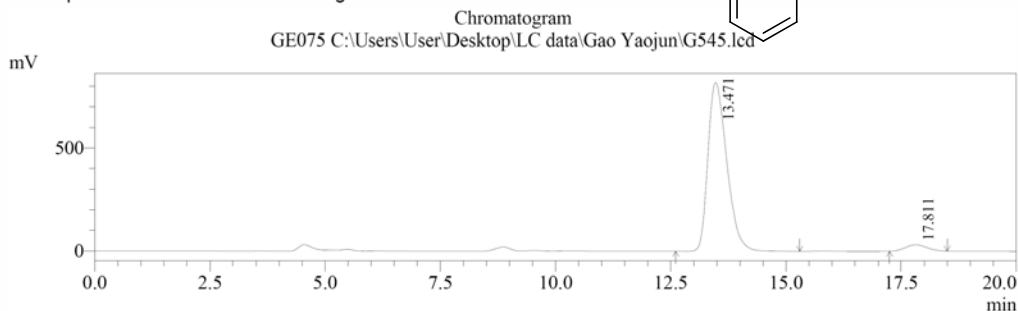

PeakTable

SPD-20A Ch1 254nm

| Peak# | Ret. Time | Area     | Height | Area %  | Height % |
|-------|-----------|----------|--------|---------|----------|
| 1     | 13.471    | 23325204 | 818742 | 95.911  | 96.340   |
| 2     | 17.811    | 994469   | 31105  | 4.089   | 3.660    |
| Total |           | 24319673 | 849847 | 100.000 | 100.000  |

Compound 3b

==== Shimadzu LCsolution Analysis Report ====

C:\Users\User\Desktop\LC data\Gao Yaojun\G546.lcd  
 Acquired by : Admin  
 Sample Name : GE079  
 Sample ID : GYJ  
 Data File Name : G546.lcd  
 Method File Name : 20%IPA, 1ml-min, 40min.lcm  
 Batch File Name :  
 Report File Name : Default.lcr  
 Description : IC column with guard column 20%IPA

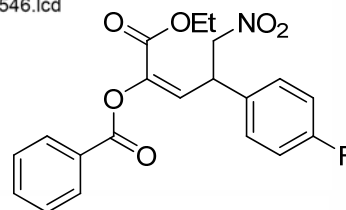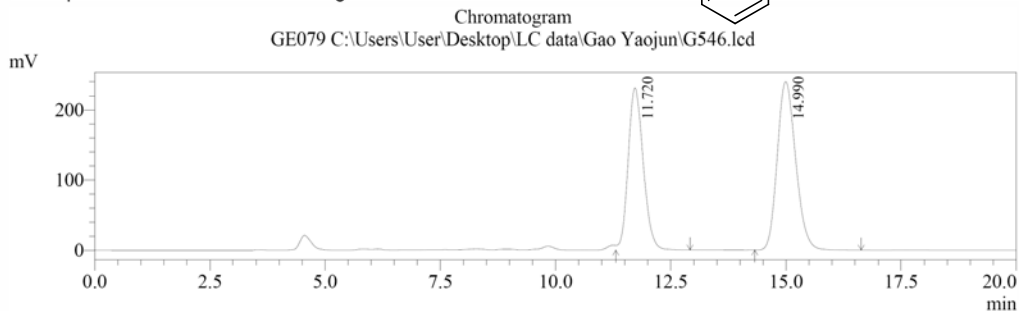

PeakTable

SPD-20A Ch1 254nm

| Peak# | Ret. Time | Area     | Height | Area %  | Height % |
|-------|-----------|----------|--------|---------|----------|
| 1     | 11.720    | 5286614  | 230995 | 44.185  | 49.052   |
| 2     | 14.990    | 6678117  | 239926 | 55.815  | 50.948   |
| Total |           | 11964731 | 470921 | 100.000 | 100.000  |

==== Shimadzu LCsolution Analysis Report ====

C:\Users\User\Desktop\LC data\Gao Yaojun\G563.lcd  
 Acquired by : Admin  
 Sample Name : GE110  
 Sample ID : GYJ  
 Data File Name : G563.lcd  
 Method File Name : 20%IPA, 1ml-min, 40min.lcm  
 Batch File Name :  
 Report File Name : Default.lcr  
 Description : IC column with guard column 20%IPA

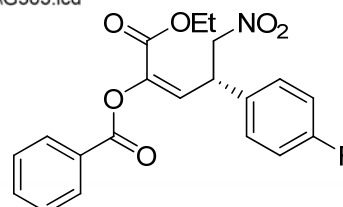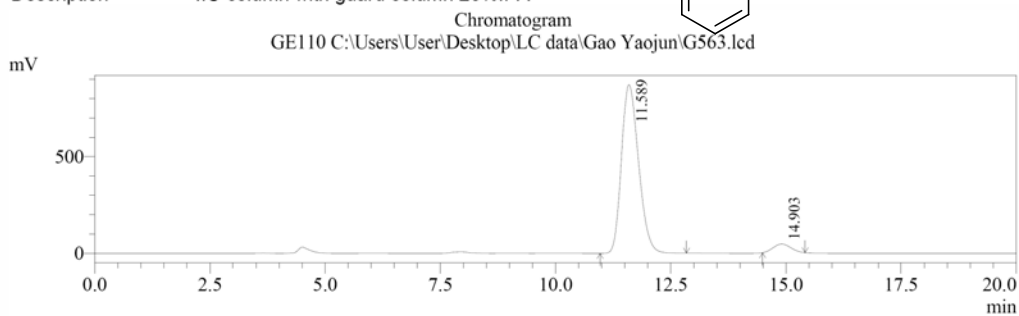

PeakTable

SPD-20A Ch1 254nm

| Peak# | Ret. Time | Area     | Height | Area %  | Height % |
|-------|-----------|----------|--------|---------|----------|
| 1     | 11.589    | 22517790 | 871552 | 94.992  | 95.114   |
| 2     | 14.903    | 1187202  | 44771  | 5.008   | 4.886    |
| Total |           | 23704992 | 916323 | 100.000 | 100.000  |

Compound 3c

==== Shimadzu LCsolution Analysis Report ====

C:\Users\User\Desktop\LC data\Gao Yaojun\G547.lcd  
Acquired by : Admin  
Sample Name : GE080  
Sample ID : GYJ  
Data File Name : G547.lcd  
Method File Name : 20%IPA, 1ml-min, 40min.lcm  
Batch File Name :  
Report File Name : Default.lcr  
Description : IC column with guard column 20%IPA

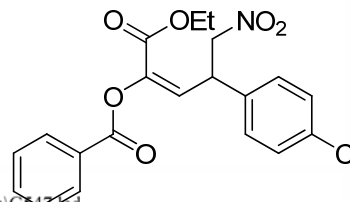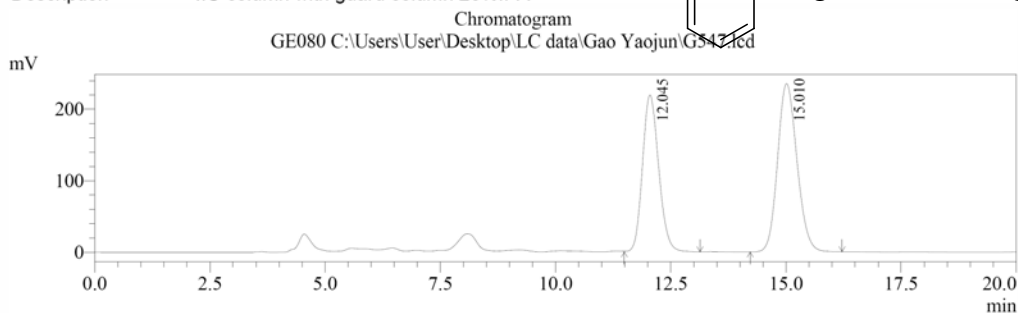

PeakTable

SPD-20A Ch1 254nm

| Peak# | Ret. Time | Area     | Height | Area %  | Height % |
|-------|-----------|----------|--------|---------|----------|
| 1     | 12.045    | 5366953  | 219299 | 43.823  | 48.244   |
| 2     | 15.010    | 6879846  | 235265 | 56.177  | 51.756   |
| Total |           | 12246799 | 454563 | 100.000 | 100.000  |

==== Shimadzu LCsolution Analysis Report ====

C:\Users\User\Desktop\LC data\Gao Yaojun\G564.lcd  
Acquired by : Admin  
Sample Name : GE111  
Sample ID : GYJ  
Data File Name : G564.lcd  
Method File Name : 20%IPA, 1ml-min, 40min.lcm  
Batch File Name :  
Report File Name : Default.lcr  
Description : IC column with guard column 20%IPA

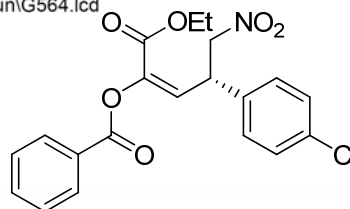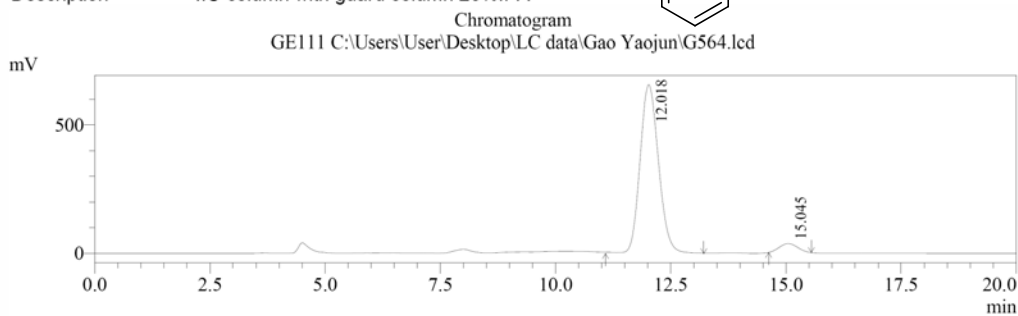

PeakTable

SPD-20A Ch1 254nm

| Peak# | Ret. Time | Area     | Height | Area %  | Height % |
|-------|-----------|----------|--------|---------|----------|
| 1     | 12.018    | 18491790 | 658078 | 95.080  | 94.960   |
| 2     | 15.045    | 956830   | 34927  | 4.920   | 5.040    |
| Total |           | 19448620 | 693005 | 100.000 | 100.000  |

Compound 3d

==== Shimadzu LCsolution Analysis Report ====

Acquired by : Admin  
Sample Name : GE081  
Sample ID : GYJ  
Data File Name : G548.lcd  
Method File Name : 20%IPA, 1ml-min, 40min.lcm  
Batch File Name :  
Report File Name : Default.lcr  
Description : IC column with guard column 20%IPA

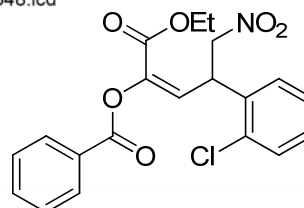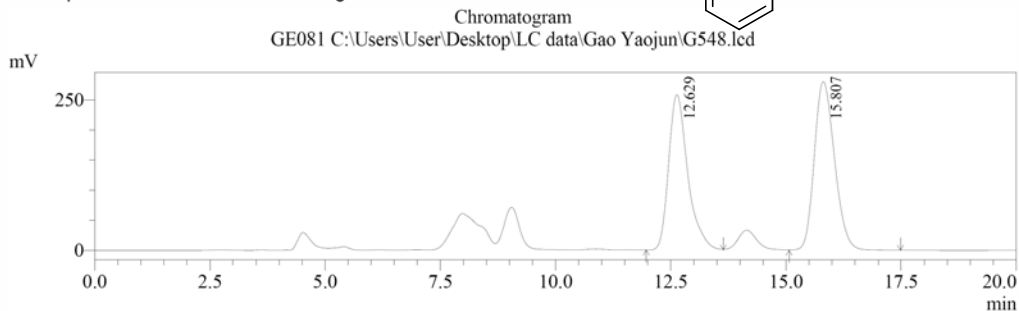

PeakTable

SPD-20A Ch1 254nm

| Peak# | Ret. Time | Area     | Height | Area %  | Height % |
|-------|-----------|----------|--------|---------|----------|
| 1     | 12.629    | 7485549  | 258343 | 46.707  | 47.973   |
| 2     | 15.807    | 8541082  | 280171 | 53.293  | 52.027   |
| Total |           | 16026630 | 538514 | 100.000 | 100.000  |

==== Shimadzu LCsolution Analysis Report ====

Acquired by : Admin  
Sample Name : GE112  
Sample ID : GYJ  
Data File Name : G565.lcd  
Method File Name : 20%IPA, 1ml-min, 40min.lcm  
Batch File Name :  
Report File Name : Default.lcr  
Description : IC column with guard column 20%IPA

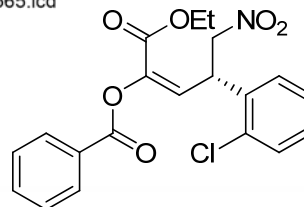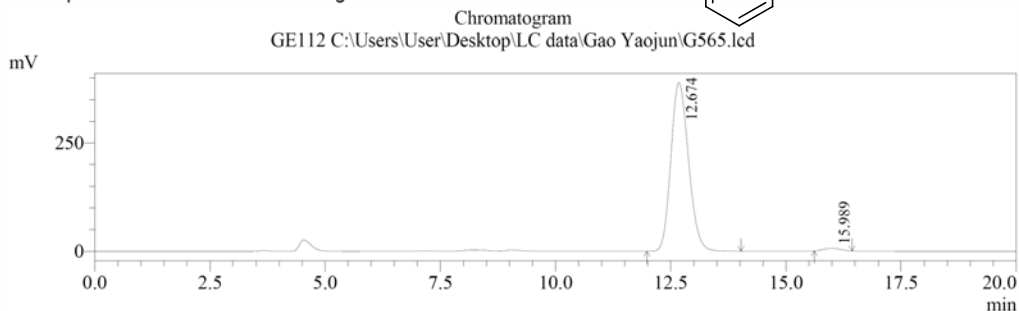

PeakTable

SPD-20A Ch1 254nm

| Peak# | Ret. Time | Area     | Height | Area %  | Height % |
|-------|-----------|----------|--------|---------|----------|
| 1     | 12.674    | 10361018 | 389086 | 98.513  | 98.456   |
| 2     | 15.989    | 156389   | 6104   | 1.487   | 1.544    |
| Total |           | 10517407 | 395190 | 100.000 | 100.000  |

Compound 3e

==== Shimadzu LCsolution Analysis Report ====

C:\Users\User\Desktop\LC data\Gao Yaojun\G577.lcd  
Acquired by : Admin  
Sample Name : GE127  
Sample ID : GYJ  
Data File Name : G577.lcd  
Method File Name : 20%IPA, 1ml-min, 40min.lcm  
Batch File Name :  
Report File Name : Default.lcr  
Description : IC column with guard column 20%IPA

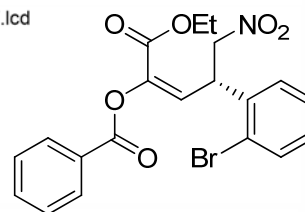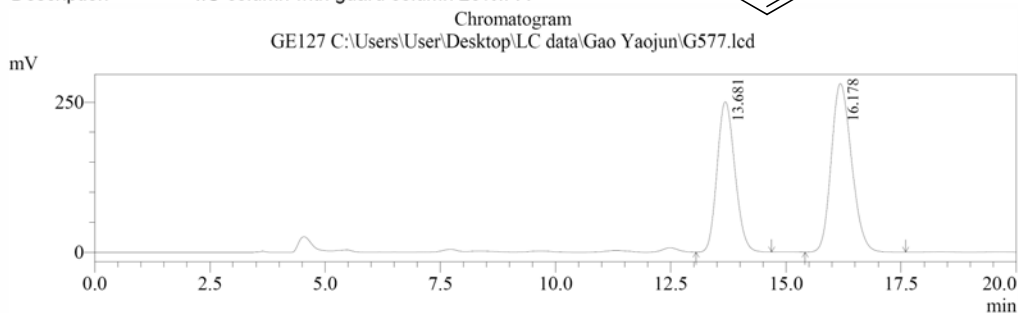

PeakTable

SPD-20A Ch1 254nm

| Peak# | Ret. Time | Area     | Height | Area %  | Height % |
|-------|-----------|----------|--------|---------|----------|
| 1     | 13.681    | 6722981  | 250142 | 43.832  | 47.152   |
| 2     | 16.178    | 8614980  | 280362 | 56.168  | 52.848   |
| Total |           | 15337961 | 530505 | 100.000 | 100.000  |

==== Shimadzu LCsolution Analysis Report ====

C:\Users\User\Desktop\LC data\Gao Yaojun\G582.lcd  
Acquired by : Admin  
Sample Name : GE129  
Sample ID : RQ  
Data File Name : G582.lcd  
Method File Name : 20%IPA, 1ml-min, 40min.lcm  
Batch File Name :  
Report File Name : Default.lcr  
Description : IC column with guard column 20%IPA

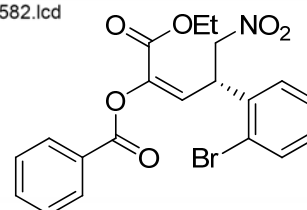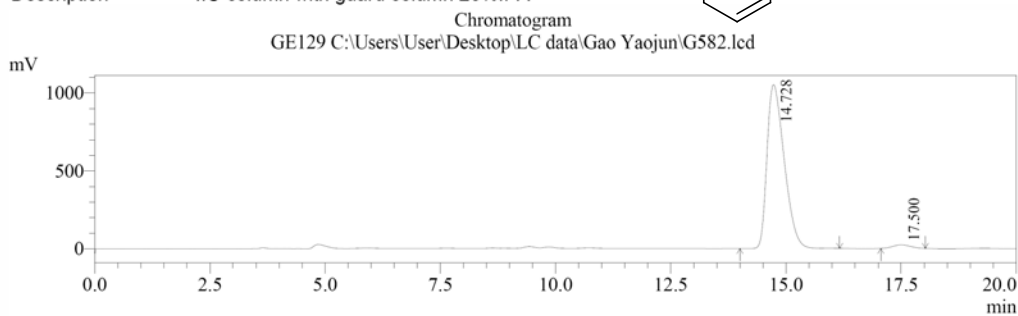

PeakTable

SPD-20A Ch1 254nm

| Peak# | Ret. Time | Area     | Height  | Area %  | Height % |
|-------|-----------|----------|---------|---------|----------|
| 1     | 14.728    | 27294759 | 1052924 | 97.814  | 97.876   |
| 2     | 17.500    | 610127   | 22848   | 2.186   | 2.124    |
| Total |           | 27904886 | 1075772 | 100.000 | 100.000  |

Compound 3f

==== Shimadzu LCsolution Analysis Report ====

C:\Users\User\Desktop\LC data\Gao Yaojun\G555.lcd  
 Acquired by : Admin  
 Sample Name : GE082  
 Sample ID : GYJ  
 Data File Name : G555.lcd  
 Method File Name : 20%IPA, 1ml-min, 40min.lcm  
 Batch File Name :  
 Report File Name : Default.lcr  
 Description : IC column with guard column 20%IPA

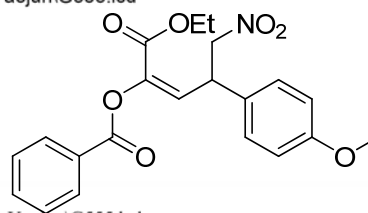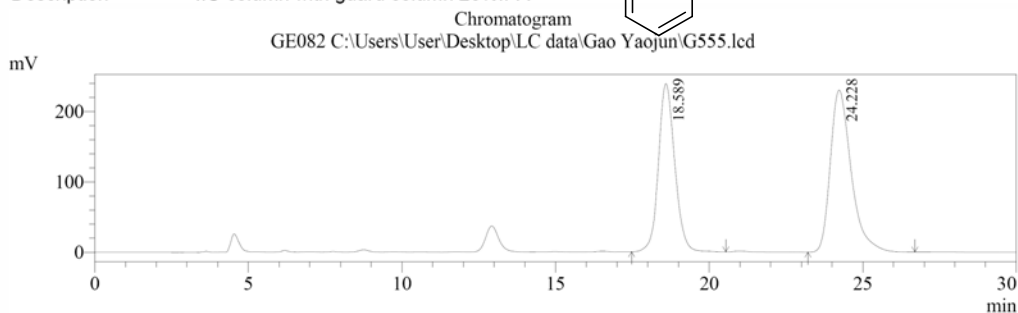

PeakTable

SPD-20A Ch1 254nm

| Peak# | Ret. Time | Area     | Height | Area %  | Height % |
|-------|-----------|----------|--------|---------|----------|
| 1     | 18.589    | 8818254  | 238947 | 44.794  | 50.932   |
| 2     | 24.228    | 10868066 | 230199 | 55.206  | 49.068   |
| Total |           | 19686320 | 469146 | 100.000 | 100.000  |

==== Shimadzu LCsolution Analysis Report ====

C:\Users\User\Desktop\LC data\Gao Yaojun\G566.lcd  
 Acquired by : Admin  
 Sample Name : GE113  
 Sample ID : GYJ  
 Data File Name : G566.lcd  
 Method File Name : 20%IPA, 1ml-min, 40min.lcm  
 Batch File Name :  
 Report File Name : Default.lcr  
 Description : IC column with guard column 20%IPA

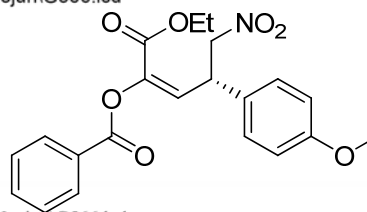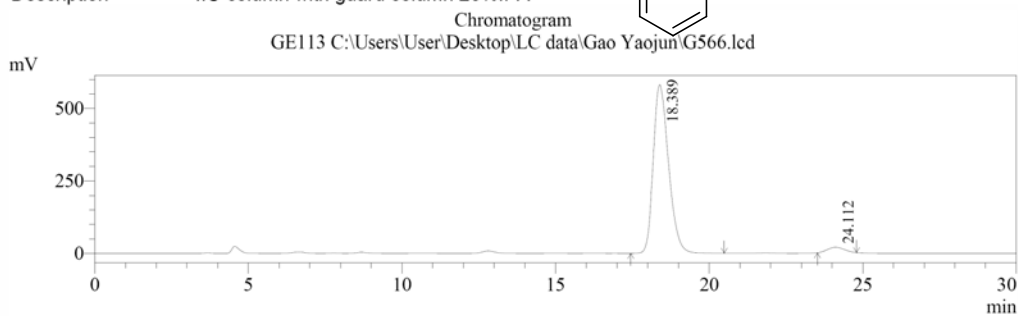

PeakTable

SPD-20A Ch1 254nm

| Peak# | Ret. Time | Area     | Height | Area %  | Height % |
|-------|-----------|----------|--------|---------|----------|
| 1     | 18.389    | 20172737 | 582016 | 96.549  | 96.876   |
| 2     | 24.112    | 721068   | 18768  | 3.451   | 3.124    |
| Total |           | 20893805 | 600784 | 100.000 | 100.000  |

Compound **3g**

==== Shimadzu LCsolution Analysis Report ====

C:\Users\User\Desktop\LC data\Gao Yaojun\G556.lcd  
 Acquired by : Admin  
 Sample Name : GE083  
 Sample ID : GYJ  
 Data File Name : G556.lcd  
 Method File Name : 20%IPA, 1ml-min, 40min.lcm  
 Batch File Name :  
 Report File Name : Default.lcr  
 Description : IC column with guard column 20%IPA

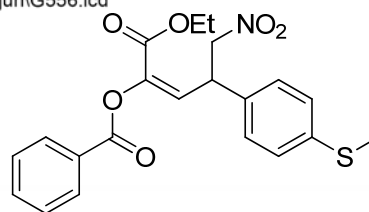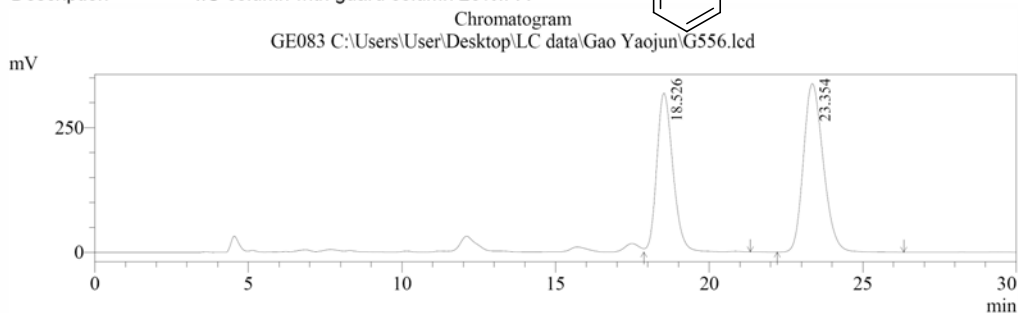

PeakTable

SPD-20A Ch1 254nm

| Peak# | Ret. Time | Area     | Height | Area %  | Height % |
|-------|-----------|----------|--------|---------|----------|
| 1     | 18.526    | 11665509 | 318648 | 43.366  | 48.518   |
| 2     | 23.354    | 15234917 | 338115 | 56.634  | 51.482   |
| Total |           | 26900426 | 656762 | 100.000 | 100.000  |

==== Shimadzu LCsolution Analysis Report ====

C:\Users\User\Desktop\LC data\Gao Yaojun\G567.lcd  
 Acquired by : Admin  
 Sample Name : GE114  
 Sample ID : GYJ  
 Data File Name : G567.lcd  
 Method File Name : 20%IPA, 1ml-min, 40min.lcm  
 Batch File Name :  
 Report File Name : Default.lcr  
 Description : IC column with guard column 20%IPA

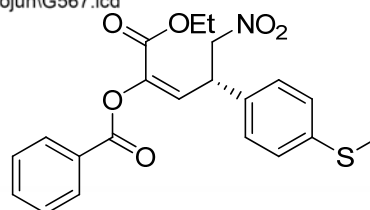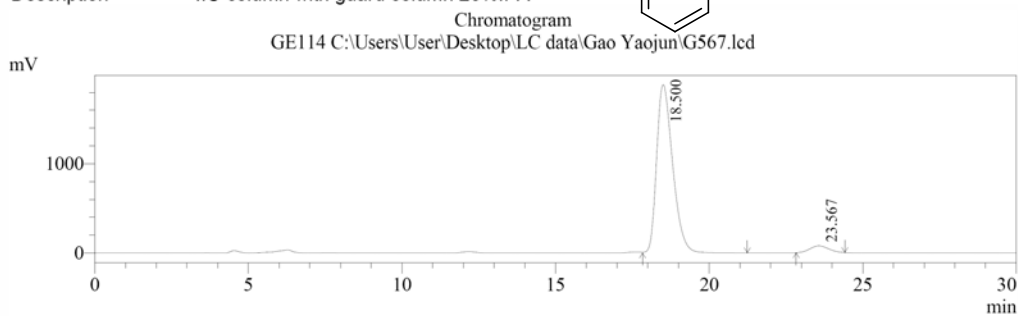

PeakTable

SPD-20A Ch1 254nm

| Peak# | Ret. Time | Area     | Height  | Area %  | Height % |
|-------|-----------|----------|---------|---------|----------|
| 1     | 18.500    | 68239449 | 1886380 | 95.533  | 96.127   |
| 2     | 23.567    | 3190712  | 75999   | 4.467   | 3.873    |
| Total |           | 71430161 | 1962379 | 100.000 | 100.000  |



Compound 3h

==== Shimadzu LCsolution Analysis Report ====

Acquired by : Admin  
Sample Name : GE085  
Sample ID : GYJ  
Data File Name : G549.lcd  
Method File Name : 20%IPA, 1ml-min, 40min.lcm  
Batch File Name :  
Report File Name : Default.lcr  
Description : IC column with guard column 20%IPA

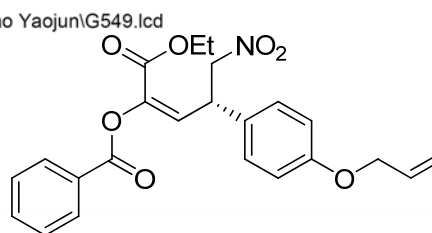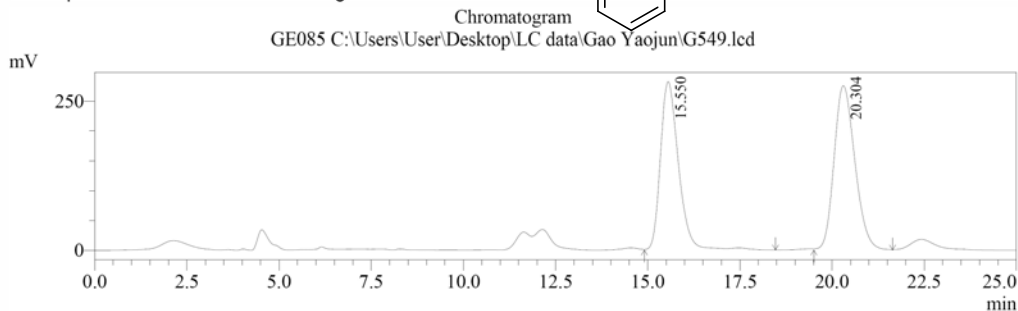

PeakTable

SPD-20A Ch1 254nm

| Peak# | Ret. Time | Area     | Height | Area %  | Height % |
|-------|-----------|----------|--------|---------|----------|
| 1     | 15.550    | 9622614  | 282276 | 47.007  | 50.595   |
| 2     | 20.304    | 10847795 | 275637 | 52.993  | 49.405   |
| Total |           | 20470409 | 557913 | 100.000 | 100.000  |

==== Shimadzu LCsolution Analysis Report ====

Acquired by : Admin  
Sample Name : GE116  
Sample ID : GYJ  
Data File Name : G568.lcd  
Method File Name : 20%IPA, 1ml-min, 40min.lcm  
Batch File Name :  
Report File Name : Default.lcr  
Description : IC column with guard column 20%IPA

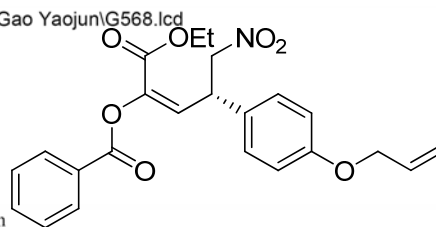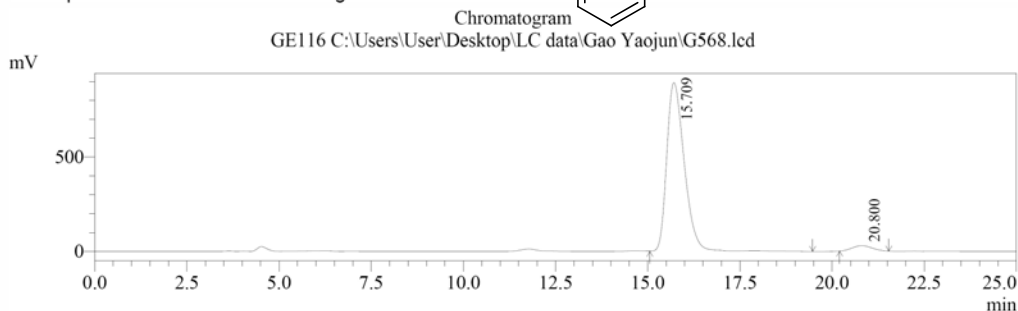

PeakTable

SPD-20A Ch1 254nm

| Peak# | Ret. Time | Area     | Height | Area %  | Height % |
|-------|-----------|----------|--------|---------|----------|
| 1     | 15.709    | 29561063 | 893515 | 96.512  | 96.894   |
| 2     | 20.800    | 1068360  | 28644  | 3.488   | 3.106    |
| Total |           | 30629423 | 922159 | 100.000 | 100.000  |

Compound 3i

==== Shimadzu LCsolution Analysis Report ====

Acquired by : Admin  
 Sample Name : GE086  
 Sample ID : GYJ  
 Data File Name : G682.lcd  
 Method File Name : 20%IPA, 1ml-min, 40min.lcm  
 Batch File Name :  
 Report File Name : Default.lcr  
 Description : IC column 20%IPA

C:\Users\User\Desktop\LC data\Gao Yaojun\G682.lcd

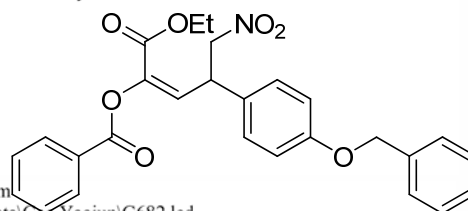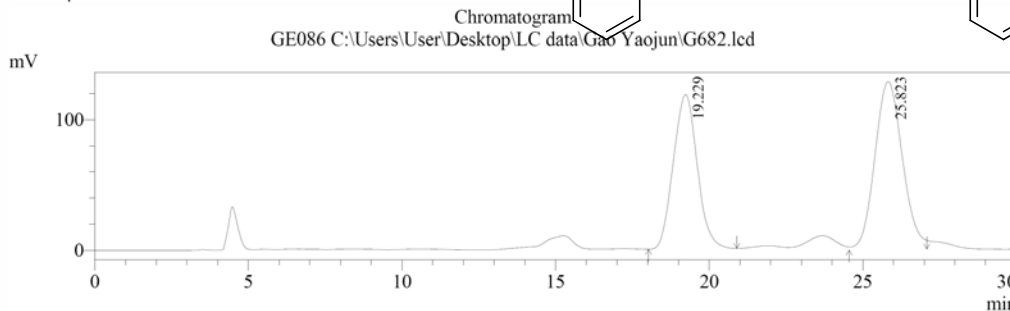

PeakTable

SPD-20A Ch1 254nm

| Peak# | Ret. Time | Area     | Height | Area %  | Height % |
|-------|-----------|----------|--------|---------|----------|
| 1     | 19.229    | 6399843  | 118228 | 44.329  | 47.890   |
| 2     | 25.823    | 8037321  | 128648 | 55.671  | 52.110   |
| Total |           | 14437165 | 246876 | 100.000 | 100.000  |

==== Shimadzu LCsolution Analysis Report ====

Acquired by : Admin  
 Sample Name : GE117  
 Sample ID : GYJ  
 Data File Name : G667.lcd  
 Method File Name : 20%IPA, 1ml-min, 40min.lcm  
 Batch File Name :  
 Report File Name : Default.lcr  
 Description : IC column 20%IPA

C:\Users\User\Desktop\LC data\Gao Yaojun\G667.lcd

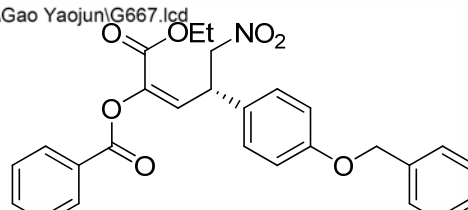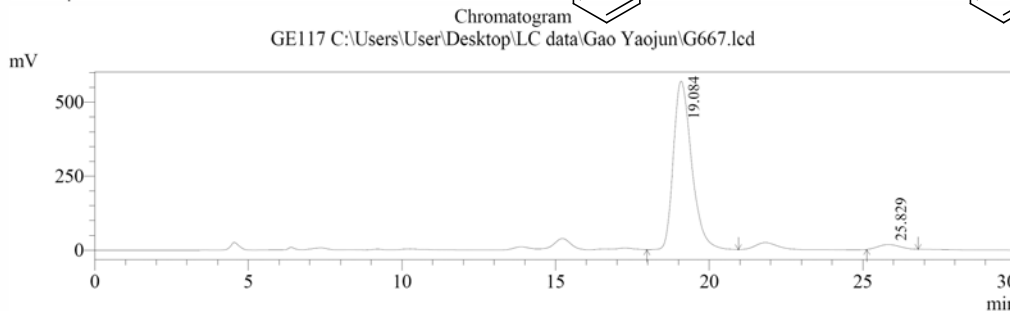

PeakTable

SPD-20A Ch1 254nm

| Peak# | Ret. Time | Area     | Height | Area %  | Height % |
|-------|-----------|----------|--------|---------|----------|
| 1     | 19.084    | 23639892 | 569585 | 96.699  | 97.189   |
| 2     | 25.829    | 806962   | 16476  | 3.301   | 2.811    |
| Total |           | 24446854 | 586061 | 100.000 | 100.000  |

Compound 3j

==== Shimadzu LCsolution Analysis Report ====

Acquired by : Admin  
 Sample Name : GE087  
 Sample ID : GYJ  
 Data File Name : G550.lcd  
 Method File Name : 20%IPA, 1ml-min, 40min.lcm  
 Batch File Name :  
 Report File Name : Default.lcr  
 Description : IC column with guard column 20%IPA

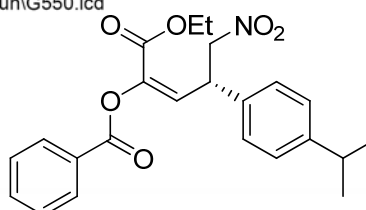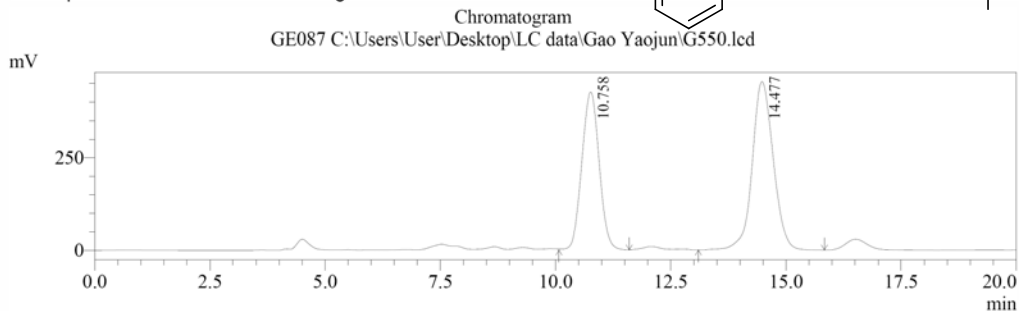

PeakTable

SPD-20A Ch1 254nm

| Peak# | Ret. Time | Area     | Height | Area %  | Height % |
|-------|-----------|----------|--------|---------|----------|
| 1     | 10.758    | 11194807 | 426522 | 43.574  | 48.395   |
| 2     | 14.477    | 14496568 | 454815 | 56.426  | 51.605   |
| Total |           | 25691375 | 881338 | 100.000 | 100.000  |

==== Shimadzu LCsolution Analysis Report ====

Acquired by : Admin  
 Sample Name : GE118  
 Sample ID : GYJ  
 Data File Name : G569.lcd  
 Method File Name : 20%IPA, 1ml-min, 40min.lcm  
 Batch File Name :  
 Report File Name : Default.lcr  
 Description : IC column with guard column 20%IPA

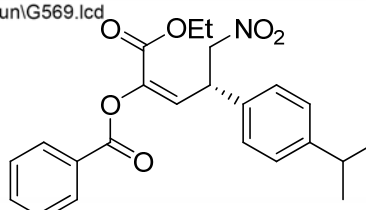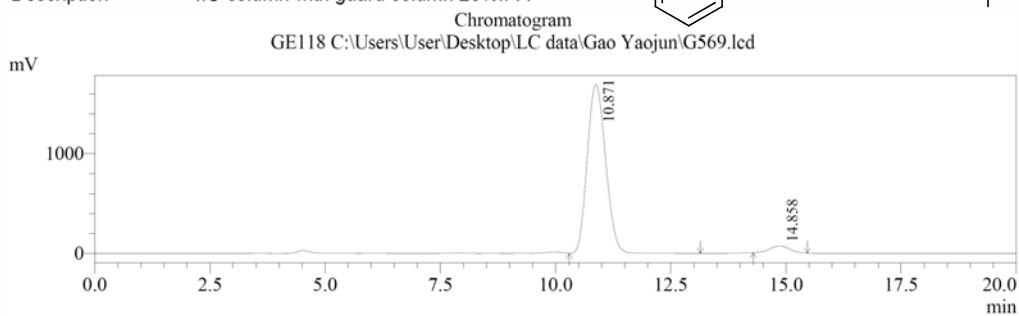

PeakTable

SPD-20A Ch1 254nm

| Peak# | Ret. Time | Area     | Height  | Area %  | Height % |
|-------|-----------|----------|---------|---------|----------|
| 1     | 10.871    | 46877732 | 1692791 | 95.802  | 96.064   |
| 2     | 14.858    | 2054272  | 69366   | 4.198   | 3.936    |
| Total |           | 48932005 | 1762157 | 100.000 | 100.000  |

Compound 3k

==== Shimadzu LCsolution Analysis Report ====

Acquired by : Admin  
 Sample Name : GE088  
 Sample ID : GYJ  
 Data File Name : G551.lcd  
 Method File Name : 20%IPA, 1ml-min, 40min.lcm  
 Batch File Name :  
 Report File Name : Default.lcr  
 Description : IC column with guard column 20%IPA

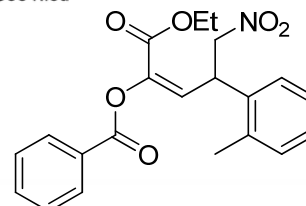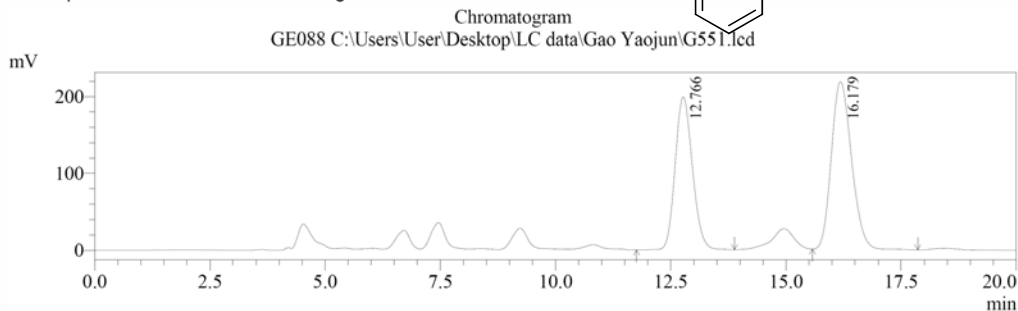

PeakTable

SPD-20A Ch1 254nm

| Peak# | Ret. Time | Area     | Height | Area %  | Height % |
|-------|-----------|----------|--------|---------|----------|
| 1     | 12.766    | 5183219  | 198974 | 43.796  | 47.692   |
| 2     | 16.179    | 6651594  | 218233 | 56.204  | 52.308   |
| Total |           | 11834813 | 417207 | 100.000 | 100.000  |

==== Shimadzu LCsolution Analysis Report ====

Acquired by : Admin  
 Sample Name : GE119  
 Sample ID : GYJ  
 Data File Name : G570.lcd  
 Method File Name : 20%IPA, 1ml-min, 40min.lcm  
 Batch File Name :  
 Report File Name : Default.lcr  
 Description : IC column with guard column 20%IPA

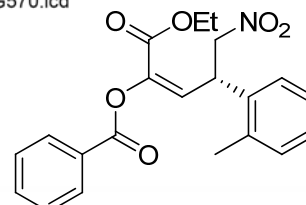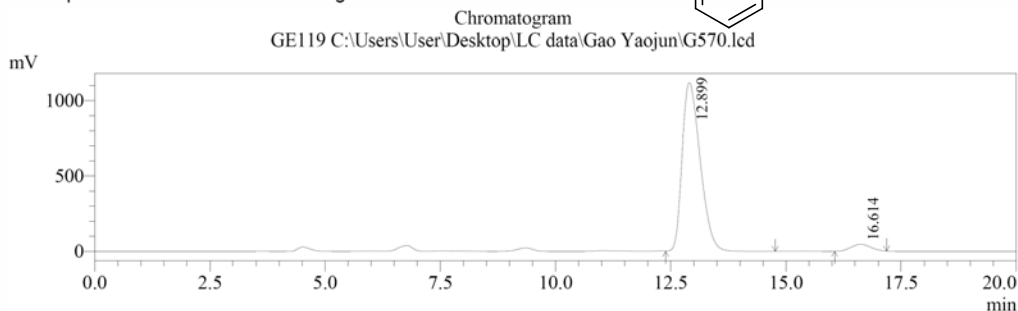

PeakTable

SPD-20A Ch1 254nm

| Peak# | Ret. Time | Area     | Height  | Area %  | Height % |
|-------|-----------|----------|---------|---------|----------|
| 1     | 12.899    | 30455168 | 1118483 | 95.776  | 96.092   |
| 2     | 16.614    | 1343054  | 45488   | 4.224   | 3.908    |
| Total |           | 31798222 | 1163970 | 100.000 | 100.000  |

Compound 3I

==== Shimadzu LCsolution Analysis Report ====

Acquired by : Admin  
 Sample Name : GY089  
 Sample ID : GYJ  
 Data File Name : G559.lcd  
 Method File Name : 20%IPA, 1ml-min, 40min.lcm  
 Batch File Name :  
 Report File Name : Default.lcr  
 Description : IC column with guard column 20%IPA

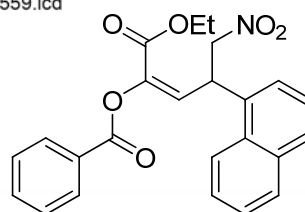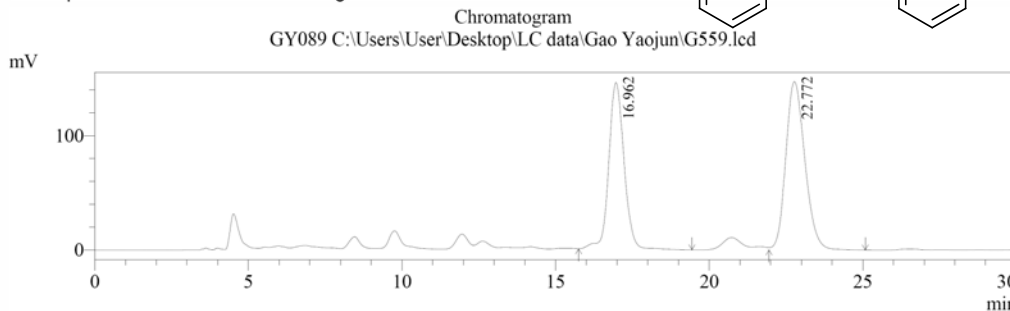

PeakTable

SPD-20A Ch1 254nm

| Peak# | Ret. Time | Area     | Height | Area %  | Height % |
|-------|-----------|----------|--------|---------|----------|
| 1     | 16.962    | 5027778  | 145599 | 44.159  | 49.749   |
| 2     | 22.772    | 6357797  | 147072 | 55.841  | 50.251   |
| Total |           | 11385575 | 292671 | 100.000 | 100.000  |

==== Shimadzu LCsolution Analysis Report ====

Acquired by : Admin  
 Sample Name : GE120  
 Sample ID : GYJ  
 Data File Name : G571.lcd  
 Method File Name : 20%IPA, 1ml-min, 40min.lcm  
 Batch File Name :  
 Report File Name : Default.lcr  
 Description : IC column with guard column 20%IPA

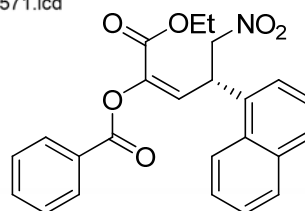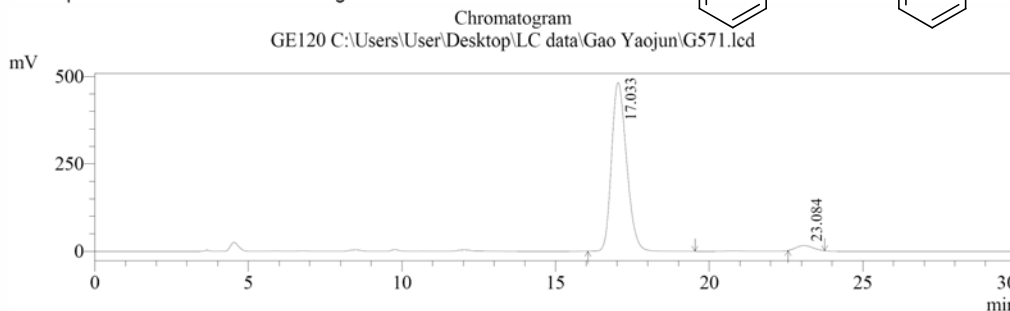

PeakTable

SPD-20A Ch1 254nm

| Peak# | Ret. Time | Area     | Height | Area %  | Height % |
|-------|-----------|----------|--------|---------|----------|
| 1     | 17.033    | 16476736 | 482281 | 96.847  | 97.092   |
| 2     | 23.084    | 536470   | 14444  | 3.153   | 2.908    |
| Total |           | 17013206 | 496726 | 100.000 | 100.000  |

Compound **3m**

==== Shimadzu LCsolution Analysis Report ====

Acquired by : Admin  
 Sample Name : GE090  
 Sample ID : GYJ  
 Data File Name : G552.lcd  
 Method File Name : 20%IPA, 1ml-min, 40min.lcm  
 Batch File Name :  
 Report File Name : Default.lcr  
 Description : IC column with guard column 20%IPA

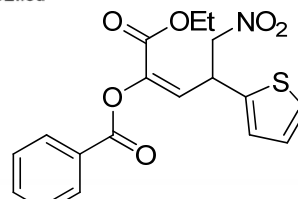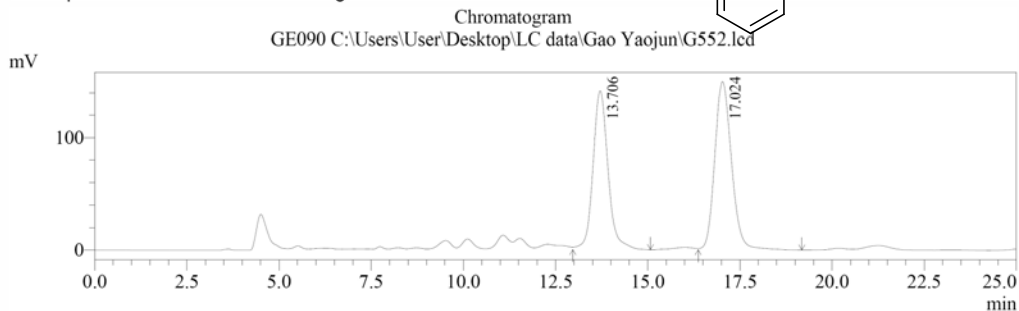

PeakTable

SPD-20A Ch1 254nm

| Peak# | Ret. Time | Area    | Height | Area %  | Height % |
|-------|-----------|---------|--------|---------|----------|
| 1     | 13.706    | 4002846 | 141125 | 45.801  | 48.559   |
| 2     | 17.024    | 4736879 | 149502 | 54.199  | 51.441   |
| Total |           | 8739725 | 290627 | 100.000 | 100.000  |

==== Shimadzu LCsolution Analysis Report ====

Acquired by : Admin  
 Sample Name : GE121  
 Sample ID : GYJ  
 Data File Name : G572.lcd  
 Method File Name : 20%IPA, 1ml-min, 40min.lcm  
 Batch File Name :  
 Report File Name : Default.lcr  
 Description : IC column with guard column 20%IPA

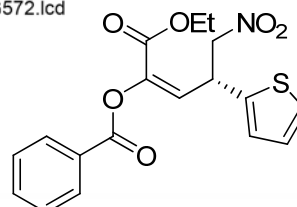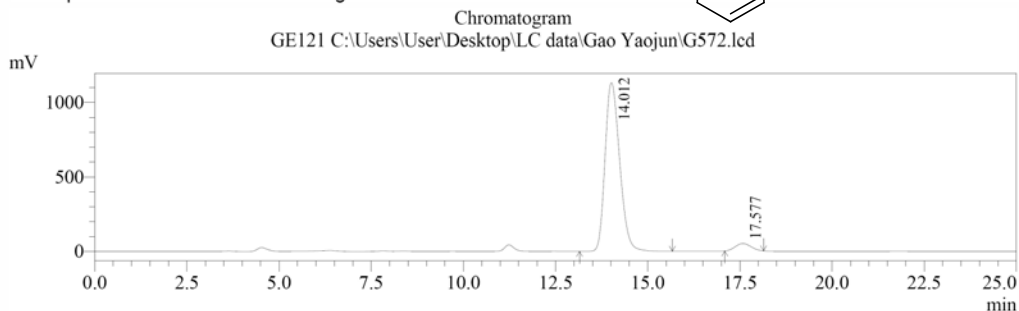

PeakTable

SPD-20A Ch1 254nm

| Peak# | Ret. Time | Area     | Height  | Area %  | Height % |
|-------|-----------|----------|---------|---------|----------|
| 1     | 14.012    | 31167444 | 1133451 | 95.456  | 95.754   |
| 2     | 17.577    | 1483729  | 50261   | 4.544   | 4.246    |
| Total |           | 32651173 | 1183712 | 100.000 | 100.000  |

Compound 3n

==== Shimadzu LCsolution Analysis Report ====

C:\Users\User\Desktop\LC data\Gao Yaojun\G562.lcd  
Acquired by : Admin  
Sample Name : GE103  
Sample ID : GYJ  
Data File Name : G562.lcd  
Method File Name : 20%IPA, 1ml-min, 40min.lcm  
Batch File Name :  
Report File Name : Default.lcr  
Description : IC column with guard column 20%IPA

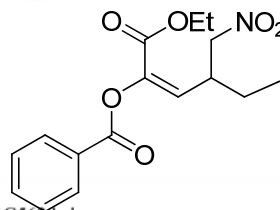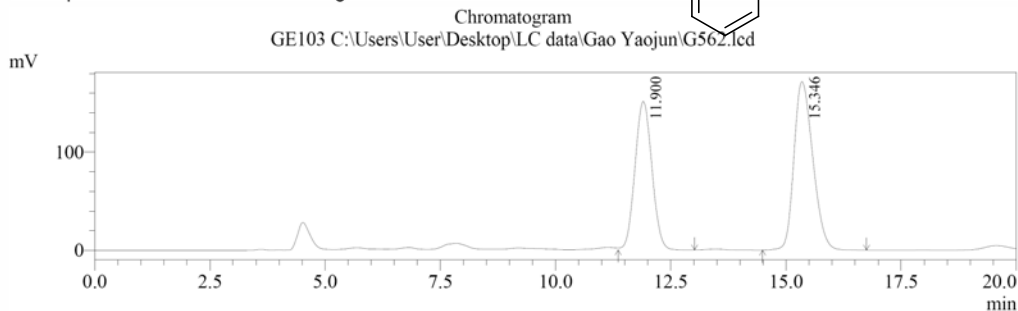

PeakTable

SPD-20A Ch1 254nm

| Peak# | Ret. Time | Area    | Height | Area %  | Height % |
|-------|-----------|---------|--------|---------|----------|
| 1     | 11.900    | 3866622 | 151138 | 44.092  | 46.835   |
| 2     | 15.346    | 4902823 | 171565 | 55.908  | 53.165   |
| Total |           | 8769445 | 322702 | 100.000 | 100.000  |

==== Shimadzu LCsolution Analysis Report ====

C:\Users\User\Desktop\LC data\Gao Yaojun\G574.lcd  
Acquired by : Admin  
Sample Name : GE123  
Sample ID : GYJ  
Data File Name : G574.lcd  
Method File Name : 20%IPA, 1ml-min, 40min.lcm  
Batch File Name :  
Report File Name : Default.lcr  
Description : IC column with guard column 20%IPA

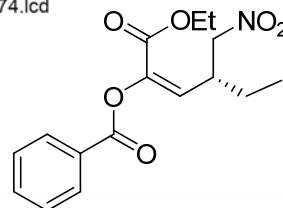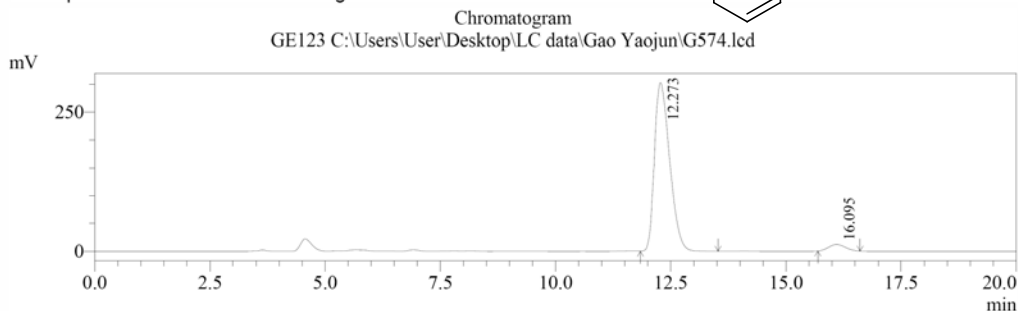

PeakTable

SPD-20A Ch1 254nm

| Peak# | Ret. Time | Area    | Height | Area %  | Height % |
|-------|-----------|---------|--------|---------|----------|
| 1     | 12.273    | 6978484 | 303131 | 95.879  | 96.236   |
| 2     | 16.095    | 299968  | 11855  | 4.121   | 3.764    |
| Total |           | 7278452 | 314986 | 100.000 | 100.000  |

Compound 3o

==== Shimadzu LCsolution Analysis Report ====

Acquired by : Admin  
Sample Name : GE091  
Sample ID : GYJ  
Data File Name : G553.lcd  
Method File Name : 20%IPA, 1ml-min, 40min.lcm  
Batch File Name :  
Report File Name : Default.lcr  
Description : IC column with guard column 20%IPA

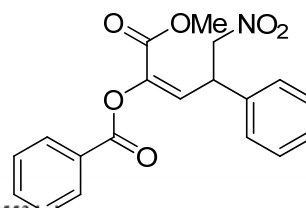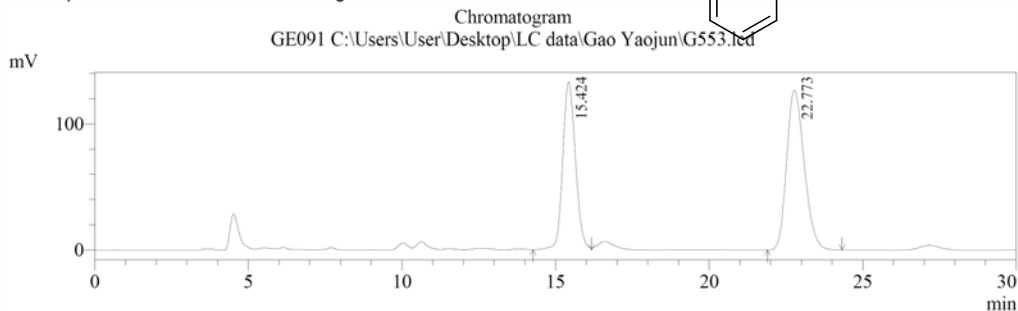

PeakTable

SPD-20A Ch1 254nm

| Peak# | Ret. Time | Area    | Height | Area %  | Height % |
|-------|-----------|---------|--------|---------|----------|
| 1     | 15.424    | 3827404 | 133351 | 43.182  | 51.304   |
| 2     | 22.773    | 5035981 | 126571 | 56.818  | 48.696   |
| Total |           | 8863385 | 259923 | 100.000 | 100.000  |

==== Shimadzu LCsolution Analysis Report ====

Acquired by : Admin  
Sample Name : GE122  
Sample ID : GYJ  
Data File Name : G573.lcd  
Method File Name : 20%IPA, 1ml-min, 40min.lcm  
Batch File Name :  
Report File Name : Default.lcr  
Description : IC column with guard column 20%IPA

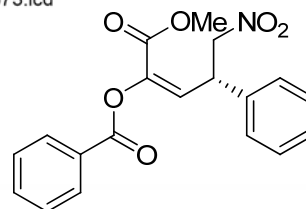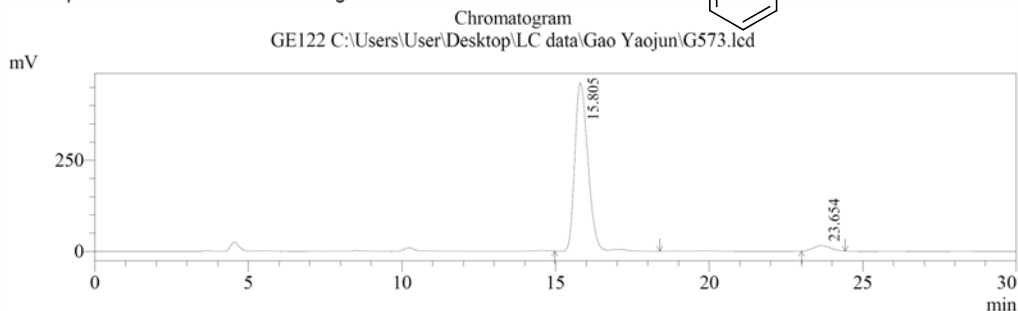

PeakTable

SPD-20A Ch1 254nm

| Peak# | Ret. Time | Area     | Height | Area %  | Height % |
|-------|-----------|----------|--------|---------|----------|
| 1     | 15.805    | 13810871 | 462639 | 95.968  | 96.853   |
| 2     | 23.654    | 580271   | 15033  | 4.032   | 3.147    |
| Total |           | 14391142 | 477672 | 100.000 | 100.000  |



Compound 3p

==== Shimadzu LCsolution Analysis Report ====

Acquired by : Admin  
 Sample Name : GE131  
 Sample ID : GYJ  
 Data File Name : G579.lcd  
 Method File Name : 20%IPA, 1ml-min, 40min.lcm  
 Batch File Name :  
 Report File Name : Default.lcr  
 Description : IC column with guard column 20%IPA

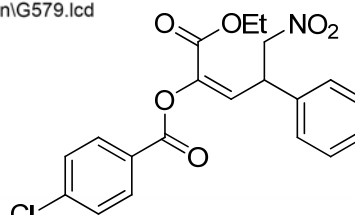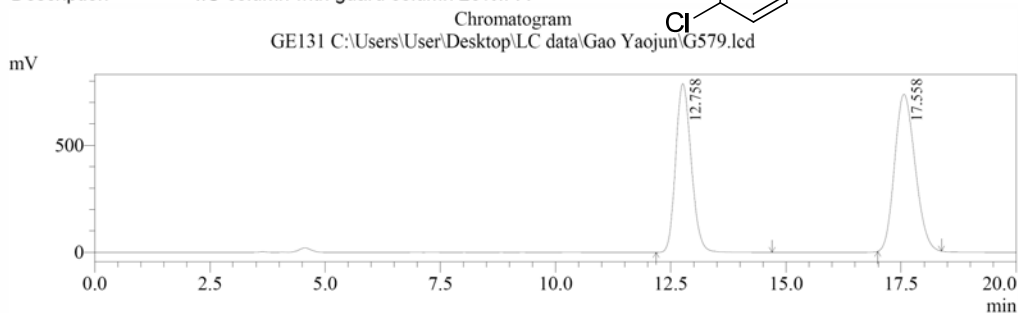

PeakTable

SPD-20A Ch1 254nm

| Peak# | Ret. Time | Area     | Height  | Area %  | Height % |
|-------|-----------|----------|---------|---------|----------|
| 1     | 12.758    | 18535379 | 788010  | 44.981  | 51.813   |
| 2     | 17.558    | 22671701 | 732868  | 55.019  | 48.187   |
| Total |           | 41207080 | 1520878 | 100.000 | 100.000  |

==== Shimadzu LCsolution Analysis Report ====

Acquired by : Admin  
 Sample Name : GE212  
 Sample ID : GYJ  
 Data File Name : G674.lcd  
 Method File Name : 20%IPA, 1ml-min, 40min.lcm  
 Batch File Name :  
 Report File Name : Default.lcr  
 Description : IC column 20%IPA

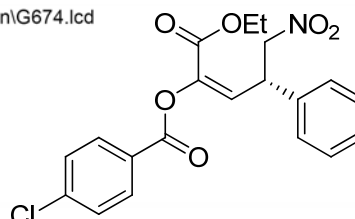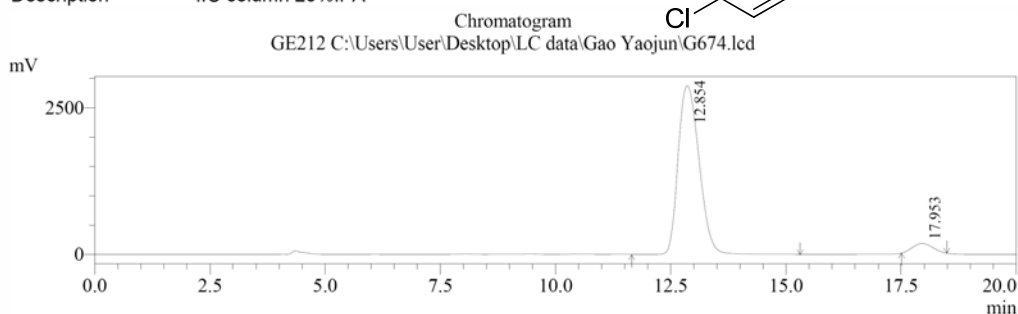

PeakTable

SPD-20A Ch1 254nm

| Peak# | Ret. Time | Area     | Height  | Area %  | Height % |
|-------|-----------|----------|---------|---------|----------|
| 1     | 12.854    | 92472785 | 2888439 | 94.883  | 94.640   |
| 2     | 17.953    | 4986556  | 163586  | 5.117   | 5.360    |
| Total |           | 97459340 | 3052025 | 100.000 | 100.000  |

Compound 3q

==== Shimadzu LCsolution Analysis Report ====

Acquired by : Admin  
 Sample Name : GE106  
 Sample ID : GYJ  
 Data File Name : G650.lcd  
 Method File Name : 20%IPA, 1ml-min, 40min.lcm  
 Batch File Name :  
 Report File Name : Default.lcr  
 Description : IC column with guard column,20%IPA

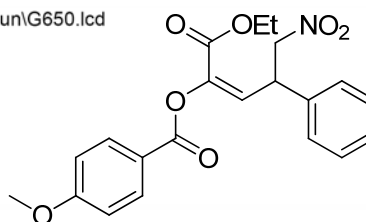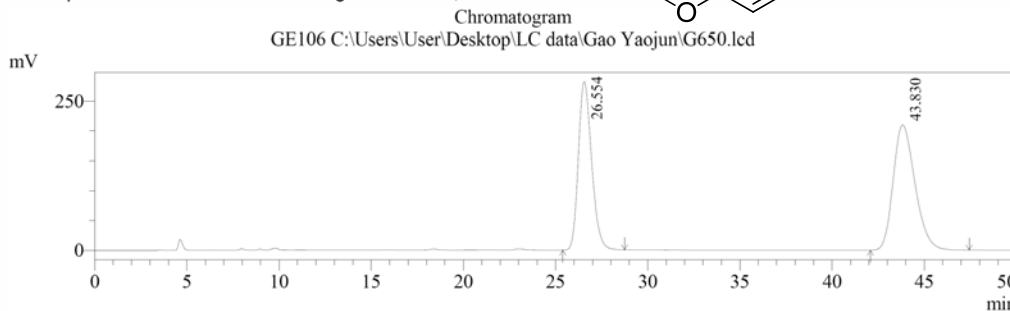

PeakTable

SPD-20A Ch1 254nm

| Peak# | Ret. Time | Area     | Height | Area %  | Height % |
|-------|-----------|----------|--------|---------|----------|
| 1     | 26.554    | 14107413 | 282231 | 44.946  | 57.360   |
| 2     | 43.830    | 17279894 | 209799 | 55.054  | 42.640   |
| Total |           | 31387307 | 492030 | 100.000 | 100.000  |

==== Shimadzu LCsolution Analysis Report ====

Acquired by : Admin  
 Sample Name : GE207  
 Sample ID : GYJ  
 Data File Name : G668.lcd  
 Method File Name : 20%IPA, 1ml-min, 40min.lcm  
 Batch File Name :  
 Report File Name : Default.lcr  
 Description : IC column 20%IPA

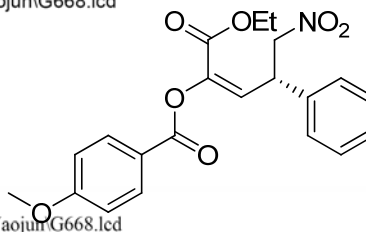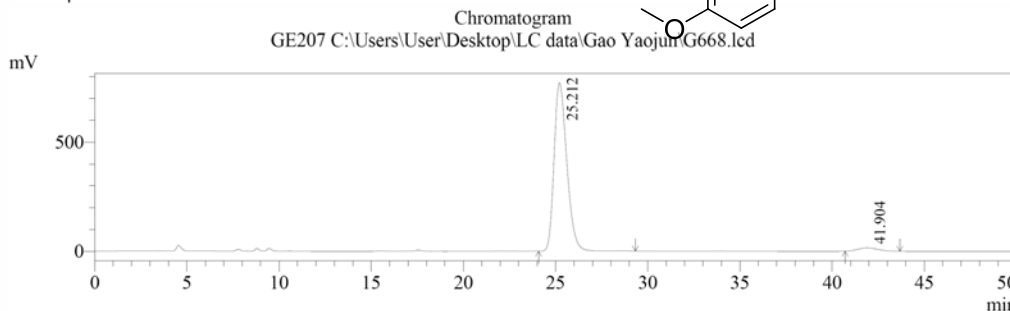

PeakTable

SPD-20A Ch1 254nm

| Peak# | Ret. Time | Area     | Height | Area %  | Height % |
|-------|-----------|----------|--------|---------|----------|
| 1     | 25.212    | 37144501 | 773033 | 96.971  | 98.050   |
| 2     | 41.904    | 1160214  | 15377  | 3.029   | 1.950    |
| Total |           | 38304715 | 788410 | 100.000 | 100.000  |

Compound 3r

==== Shimadzu LCsolution Analysis Report ====

Acquired by : Admin  
Sample Name : GE107  
Sample ID : GYJ  
Data File Name : G651.lcd  
Method File Name : 20%IPA, 1ml-min, 40min.lcm  
Batch File Name :  
Report File Name : Default.lcr  
Description : IC column with guard column,20%IPA

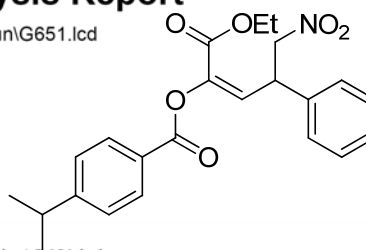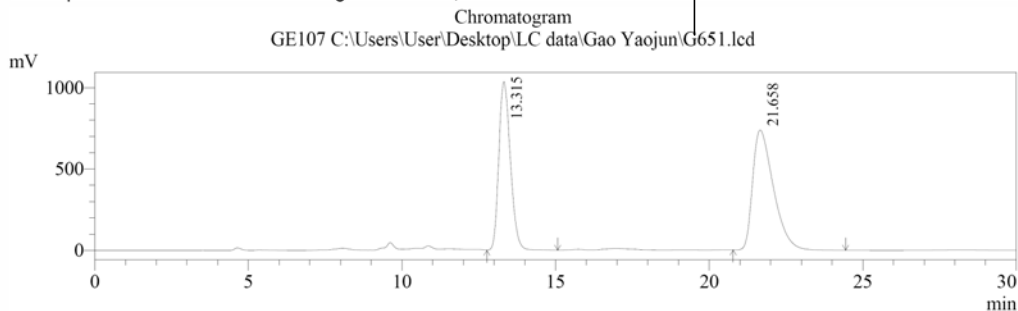

PeakTable

SPD-20A Ch1 254nm

| Peak# | Ret. Time | Area     | Height  | Area %  | Height % |
|-------|-----------|----------|---------|---------|----------|
| 1     | 13.315    | 27140715 | 1035910 | 43.988  | 58.450   |
| 2     | 21.658    | 34558945 | 736402  | 56.012  | 41.550   |
| Total |           | 61699660 | 1772312 | 100.000 | 100.000  |

==== Shimadzu LCsolution Analysis Report ====

Acquired by : Admin  
Sample Name : GE208  
Sample ID : GYJ  
Data File Name : G671.lcd  
Method File Name : 20%IPA, 1ml-min, 40min.lcm  
Batch File Name :  
Report File Name : Default.lcr  
Description : IC column 20%IPA

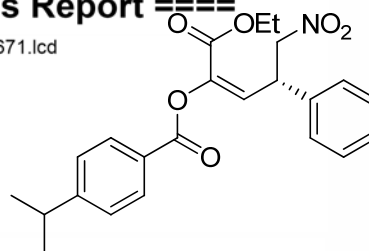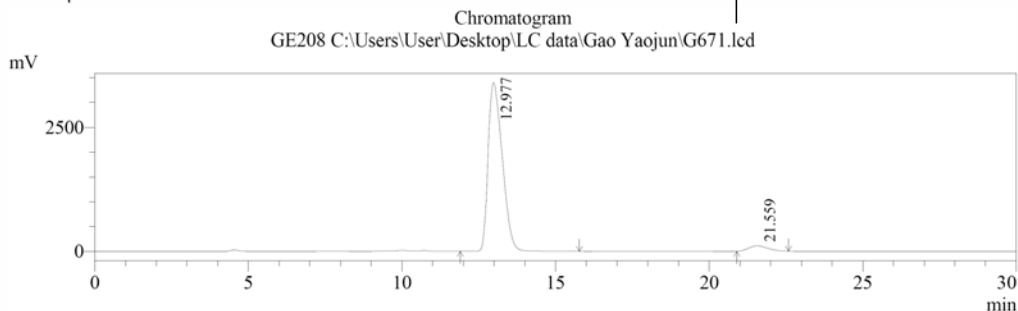

PeakTable

SPD-20A Ch1 254nm

| Peak# | Ret. Time | Area      | Height  | Area %  | Height % |
|-------|-----------|-----------|---------|---------|----------|
| 1     | 12.977    | 109541323 | 3401281 | 95.893  | 96.909   |
| 2     | 21.559    | 4691437   | 108488  | 4.107   | 3.091    |
| Total |           | 114232760 | 3509769 | 100.000 | 100.000  |

Compound 3s

==== Shimadzu LCsolution Analysis Report ====

Acquired by : Admin  
 Sample Name : GE195  
 Sample ID : GYJ  
 Data File Name : G654.lcd  
 Method File Name : 20%IPA, 1ml-min, 40min.lcm  
 Batch File Name :  
 Report File Name : Default.lcr  
 Description : IC column with guard column,20%IPA

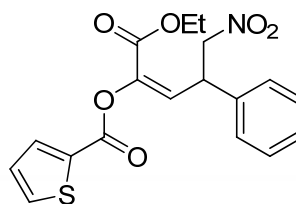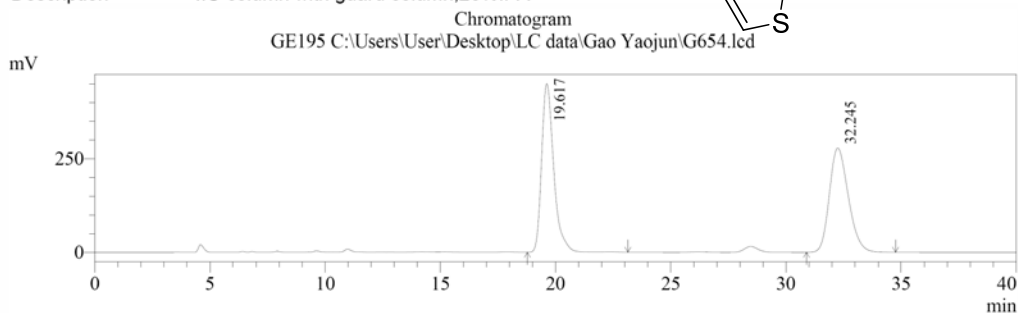

PeakTable

SPD-20A Ch1 254nm

| Peak# | Ret. Time | Area     | Height | Area %  | Height % |
|-------|-----------|----------|--------|---------|----------|
| 1     | 19.617    | 16524115 | 451063 | 50.892  | 61.796   |
| 2     | 32.245    | 15944598 | 278863 | 49.108  | 38.204   |
| Total |           | 32468713 | 729926 | 100.000 | 100.000  |

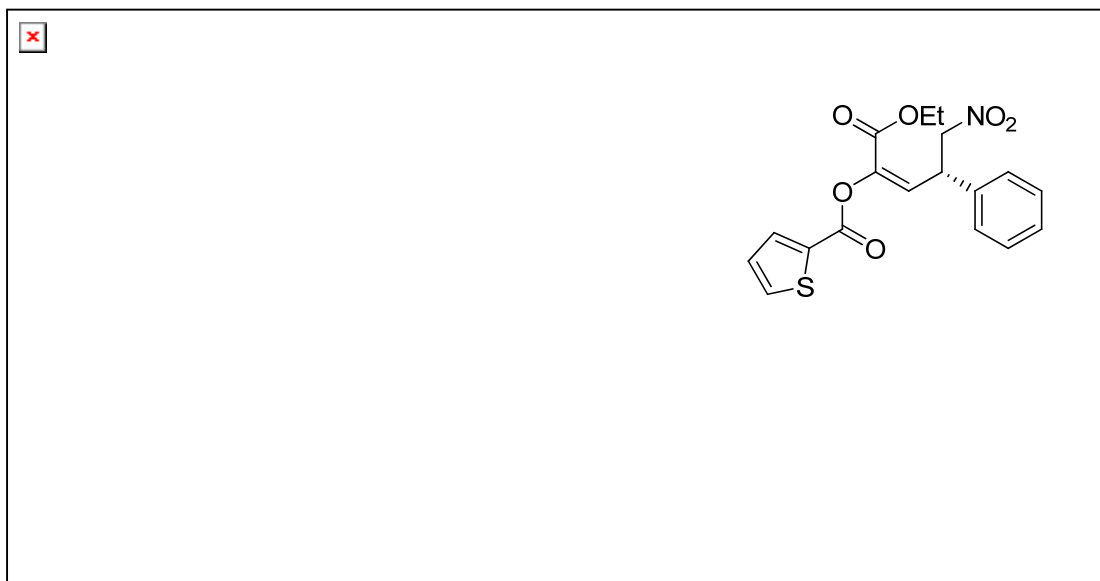

PeakTable

SPD-20A Ch1 254nm

| Peak# | Ret. Time | Area      | Height  | Area %  | Height % |
|-------|-----------|-----------|---------|---------|----------|
| 1     | 18.820    | 178087572 | 2643120 | 94.990  | 95.781   |
| 2     | 31.032    | 9393292   | 116418  | 5.010   | 4.219    |
| Total |           | 187480864 | 2759538 | 100.000 | 100.000  |

Compound 3t

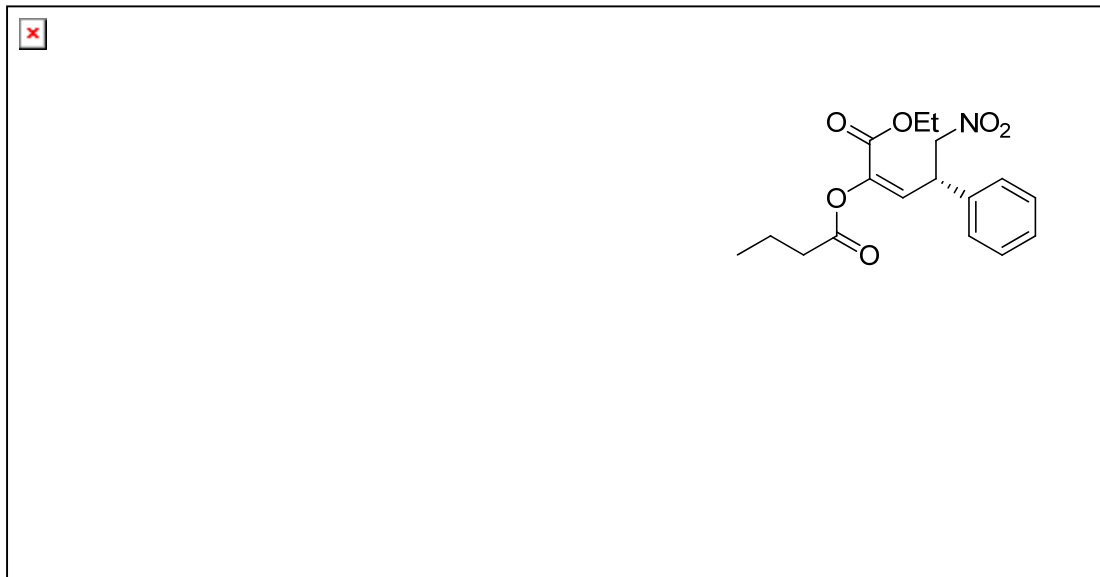

PeakTable

SPD-20A Ch1 254nm

| Peak# | Ret. Time | Area     | Height | Area %  | Height % |
|-------|-----------|----------|--------|---------|----------|
| 1     | 18.820    | 8987651  | 133373 | 46.380  | 45.504   |
| 2     | 21.817    | 10390822 | 159727 | 53.620  | 54.496   |
| Total |           | 19378472 | 293100 | 100.000 | 100.000  |

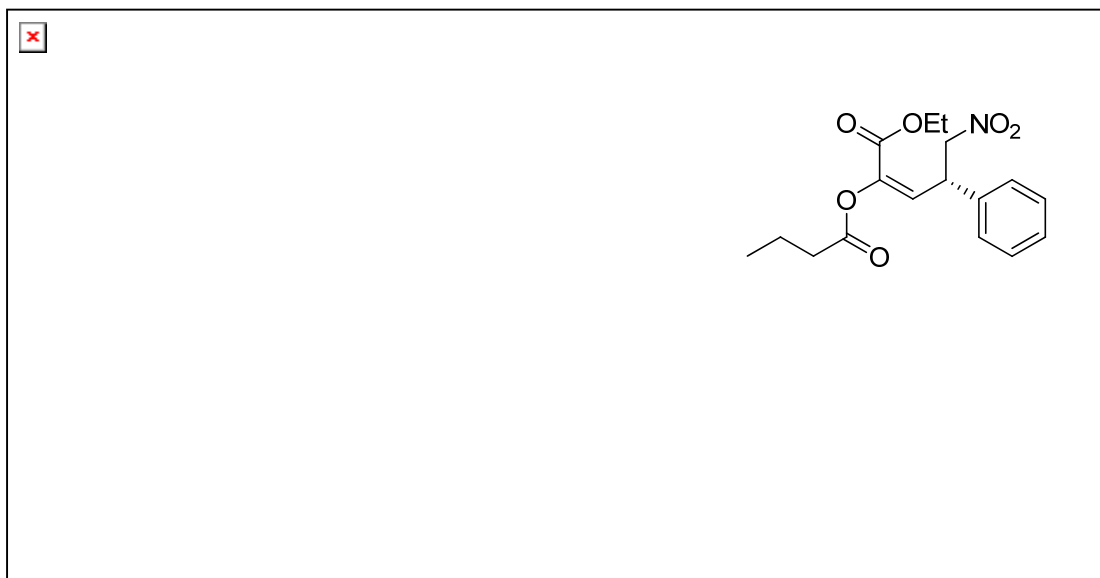

PeakTable

SPD-20A Ch1 254nm

| Peak# | Ret. Time | Area     | Height | Area %  | Height % |
|-------|-----------|----------|--------|---------|----------|
| 1     | 17.977    | 27799374 | 667391 | 87.582  | 85.223   |
| 2     | 21.527    | 3941450  | 115721 | 12.418  | 14.777   |
| Total |           | 31740824 | 783112 | 100.000 | 100.000  |
